# Supplementary material for: Designing Functionally Substituted Pyridine-Carbohydrazides for Potent Antibacterial and Devouring Antifungal Effect on Multidrug Resistant (MDR) Strains
Source: MDPI journal article supplement (doi:10.3390/molecules28010212), 2022-12-26
Supplement: s1 [file s1]

# SUPPORTING INFORMATION

## Designing Functionally Substituted Pyridine-Carbohydrazides for Potent Antibacterial and Devouring Antifungal Effect on Multidrug Resistant (MDR) Strains

Farooq-Ahmad Khan <sup>1,2,\*</sup>, Sana Yaqoob <sup>1,2</sup>, Shujaat Ali <sup>1,2</sup>, Nimra Tanveer <sup>1,2</sup>, Yan Wang <sup>2,\*</sup>, Sajda Ashraf <sup>2</sup>, Khwaja Ali Hasan <sup>3,\*</sup>, Shaden A. M. Khalifa<sup>4</sup>, Qiyang Shou <sup>5</sup>, Zaheer Ul-Haq <sup>6</sup>, Zi-Hua Jiang <sup>7</sup>, Hesham R. El-Seedi <sup>8,9,10,\*</sup>

<sup>1</sup> Third World Center for Science and Technology, International Center for Chemical and Biological Sciences, University of Karachi, Karachi-75270, Pakistan

<sup>2</sup> H.E.J. Research Institute of Chemistry, International Center for Chemical and Biological Sciences, University of Karachi, Karachi-75270, Pakistan

<sup>3</sup> Molecular and Structural Biology Research Unit, Department of Biochemistry, University of Karachi, Karachi-75270, Pakistan

<sup>4</sup> Department of Molecular Biosciences, The Wenner-Gren Institute, Stockholm University, S- 106 91 Stockholm, Sweden

<sup>5</sup> Second Clinical Medical College, Zhejiang Chinese Medical University, Hangzhou 310053, China

<sup>6</sup> Dr. Panjwani Center for Molecular Medicine and Drug Research, International Center for Chemical and Biological Sciences, University of Karachi, Karachi-75270, Pakistan

<sup>7</sup> Department of Chemistry, Lakehead University, 955 Oliver Road, Thunder Bay, Ontario, P7B 5E1, Canada

<sup>8</sup> International Research Center for Food Nutrition and Safety, Jiangsu University, Zhenjiang, 212013, China

<sup>9</sup> Pharmacognosy Group, Department of Pharmaceutical Biosciences, BMC, Uppsala University, Box 591, SE-751 24 Uppsala, Sweden

<sup>10</sup> International Joint Research Laboratory of Intelligent Agriculture and Agri-Products Processing (Jiangsu University), Jiangsu Education Department, Nanjing 210024, China

\* Correspondence: farooq.khan@iccs.edu (F.K); yan.wang@iccs.edu (Y.W); ali.hasan@uok.edu.pk (K.A.H); hesham.el-seedi@farmbio.uu.se (H.R.E.-S.)

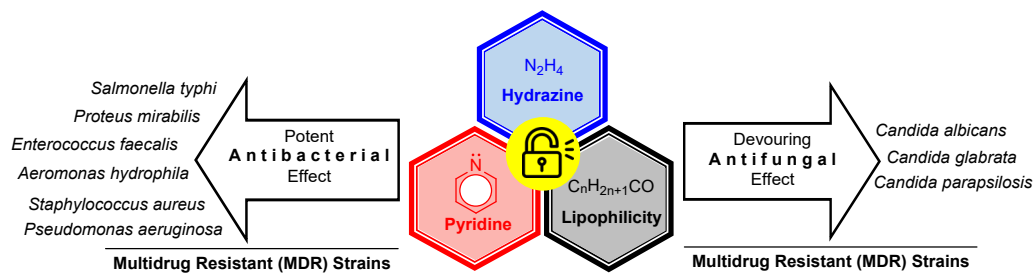

## Table of contents

|                                                                                                                  | Page # |
|------------------------------------------------------------------------------------------------------------------|--------|
| 1. <b>Figure S1.</b> IR spectrum of <i>N'</i> -Acetylpyridine-3-carbohydrazide ( <b>3</b> )                      | 3      |
| 2. <b>Figure S2.</b> <sup>1</sup> H-NMR spectrum of <i>N'</i> -Acetylpyridine-3-carbohydrazide ( <b>3</b> )      | 3      |
| 3. <b>Figure S3.</b> LR-MS (EI) spectrum of <i>N'</i> -Acetylpyridine-3-carbohydrazide ( <b>3</b> )              | 4      |
| 4. <b>Figure S4.</b> HR-MS (EI) spectral data of <i>N'</i> -Acetylpyridine-3-carbohydrazide ( <b>3</b> )         | 4      |
| 5. <b>Figure S5.</b> IR spectrum of <i>N'</i> -Butyrylpyridine-3-carbohydrazide ( <b>4</b> )                     | 5      |
| 6. <b>Figure S6.</b> <sup>1</sup> H NMR spectrum of <i>N'</i> -Butyrylpyridine-3-carbohydrazide ( <b>4</b> )     | 5      |
| 7. <b>Figure S7.</b> <sup>13</sup> C NMR spectrum of <i>N'</i> -Butyrylpyridine-3-carbohydrazide ( <b>4</b> )    | 6      |
| 8. <b>Figure S8.</b> LR-MS (EI) spectrum of <i>N'</i> -Butyrylpyridine-3-carbohydrazide ( <b>4</b> )             | 6      |
| 9. <b>Figure S9.</b> HR-MS (EI) spectral data of <i>N'</i> -Butyrylpyridine-3-carbohydrazide ( <b>4</b> )        | 7      |
| 10. <b>Figure S10.</b> IR spectrum of <i>N'</i> -Hexanoylpyridine-3-carbohydrazide ( <b>5</b> )                  | 8      |
| 11. <b>Figure S11.</b> <sup>1</sup> H NMR spectrum of <i>N'</i> -Hexanoylpyridine-3-carbohydrazide ( <b>5</b> )  | 8      |
| 12. <b>Figure S12.</b> LR-MS (EI) spectrum of <i>N'</i> -Hexanoylpyridine-3-carbohydrazide ( <b>5</b> )          | 9      |
| 13. <b>Figure S13.</b> HR-MS (EI) spectral data of <i>N'</i> -Hexanoylpyridine-3-carbohydrazide ( <b>5</b> )     | 10     |
| 14. <b>Figure S14.</b> IR spectrum of <i>N'</i> -Octanoylpyridine-3-carbohydrazide ( <b>6</b> )                  | 11     |
| 15. <b>Figure S15.</b> <sup>1</sup> H NMR spectrum of <i>N'</i> -Octanoylpyridine-3-carbohydrazide ( <b>6</b> )  | 11     |
| 16. <b>Figure S16.</b> LR-MS (EI) spectrum of <i>N'</i> -Octanoylpyridine-3-carbohydrazide ( <b>6</b> )          | 12     |
| 17. <b>Figure S17.</b> HR-MS (EI) spectral data of <i>N'</i> -Octanoylpyridine-3-carbohydrazide ( <b>6</b> )     | 13     |
| 18. <b>Figure S18.</b> IR spectrum of <i>N'</i> -Decanoylpyridine-3-carbohydrazide ( <b>7</b> )                  | 14     |
| 19. <b>Figure S19.</b> <sup>1</sup> H NMR spectrum of <i>N'</i> -Decanoylpyridine-3-carbohydrazide ( <b>7</b> )  | 14     |
| 20. <b>Figure S20.</b> LR-MS (EI) spectrum of <i>N'</i> -Decanoylpyridine-3-carbohydrazide ( <b>7</b> )          | 15     |
| 21. <b>Figure S21.</b> HR-MS (EI) spectral data of <i>N'</i> -Decanoylpyridine-3-carbohydrazide ( <b>7</b> )     | 15     |
| 22. <b>Figure S22.</b> IR spectrum of <i>N'</i> -Acetylpyridine-4-carbohydrazide ( <b>8</b> )                    | 16     |
| 23. <b>Figure S23.</b> <sup>1</sup> H NMR spectrum of <i>N'</i> -Acetylpyridine-4-carbohydrazide ( <b>8</b> )    | 16     |
| 24. <b>Figure S24.</b> LR-MS (EI) spectrum of <i>N'</i> -Acetylpyridine-4-carbohydrazide ( <b>8</b> )            | 17     |
| 25. <b>Figure S25.</b> HR-MS (EI) spectral data of <i>N'</i> -Acetylpyridine-4-carbohydrazide ( <b>8</b> )       | 17     |
| 26. <b>Figure S26.</b> IR spectrum of <i>N'</i> -Butyrylpyridine-4-carbohydrazide ( <b>9</b> )                   | 18     |
| 27. <b>Figure S27.</b> <sup>1</sup> H NMR spectrum of <i>N'</i> -Butyrylpyridine-4-carbohydrazide ( <b>9</b> )   | 18     |
| 28. <b>Figure S28.</b> <sup>13</sup> C NMR spectrum of <i>N'</i> -Butyrylpyridine-4-carbohydrazide ( <b>9</b> )  | 19     |
| 29. <b>Figure S29.</b> LR-MS (EI) spectrum of <i>N'</i> -Butyrylpyridine-4-carbohydrazide ( <b>9</b> )           | 19     |
| 30. <b>Figure S30.</b> HR-MS (EI) spectral data of <i>N'</i> -Butyrylpyridine-4-carbohydrazide ( <b>9</b> )      | 20     |
| 31. <b>Figure S31.</b> IR spectrum of <i>N'</i> -Hexanoylpyridine-4-carbohydrazide ( <b>10</b> )                 | 20     |
| 32. <b>Figure S32.</b> <sup>1</sup> H NMR spectrum of <i>N'</i> -Hexanoylpyridine-4-carbohydrazide ( <b>10</b> ) | 21     |
| 33. <b>Figure S33.</b> LR-MS (EI) spectrum of <i>N'</i> -Hexanoylpyridine-4-carbohydrazide ( <b>10</b> )         | 21     |
| 34. <b>Figure S32.</b> <sup>1</sup> H NMR spectrum of <i>N'</i> -Hexanoylpyridine-4-carbohydrazide ( <b>10</b> ) | 22     |
| 35. <b>Figure S33.</b> LR-MS (EI) spectrum of <i>N'</i> -Hexanoylpyridine-4-carbohydrazide ( <b>10</b> )         | 23     |
| 36. <b>Figure S34.</b> HR-MS (EI) spectral data of <i>N'</i> -Hexanoylpyridine-4-carbohydrazide ( <b>10</b> )    | 23     |
| 37. <b>Figure S35.</b> IR spectrum of <i>N'</i> -Octanoylpyridine-4-carbohydrazide ( <b>11</b> )                 | 24     |
| 38. <b>Figure S36.</b> <sup>1</sup> H NMR spectrum of <i>N'</i> -Octanoylpyridine-4-carbohydrazide ( <b>11</b> ) | 25     |
| 39. <b>Figure S37.</b> LR-MS (EI) spectrum of <i>N'</i> -Octanoylpyridine-4-carbohydrazide ( <b>11</b> )         | 24     |
| 40. <b>Figure S38.</b> HR-MS (EI) spectral data of <i>N'</i> -Octanoylpyridine-4-carbohydrazide ( <b>11</b> )    | 25     |
| 41. <b>Figure S39.</b> IR spectrum of <i>N'</i> -Decanoylpyridine-4-carbohydrazide ( <b>12</b> )                 | 26     |
| 42. <b>Figure S40.</b> <sup>1</sup> H NMR spectrum of <i>N'</i> -Decanoylpyridine-4-carbohydrazide ( <b>12</b> ) | 26     |
| 43. <b>Figure S41.</b> LR-MS (EI) spectrum of <i>N'</i> -Decanoylpyridine-4-carbohydrazide ( <b>12</b> )         | 27     |
| 44. <b>Figure S42.</b> HR-MS (EI) spectral data of <i>N'</i> -Decanoylpyridine-4-carbohydrazide ( <b>12</b> )    | 28     |
| 45. Time-kill curve and hemolysis assay data of compound <b>4</b> and <b>6</b> in tabular form                   | 31     |

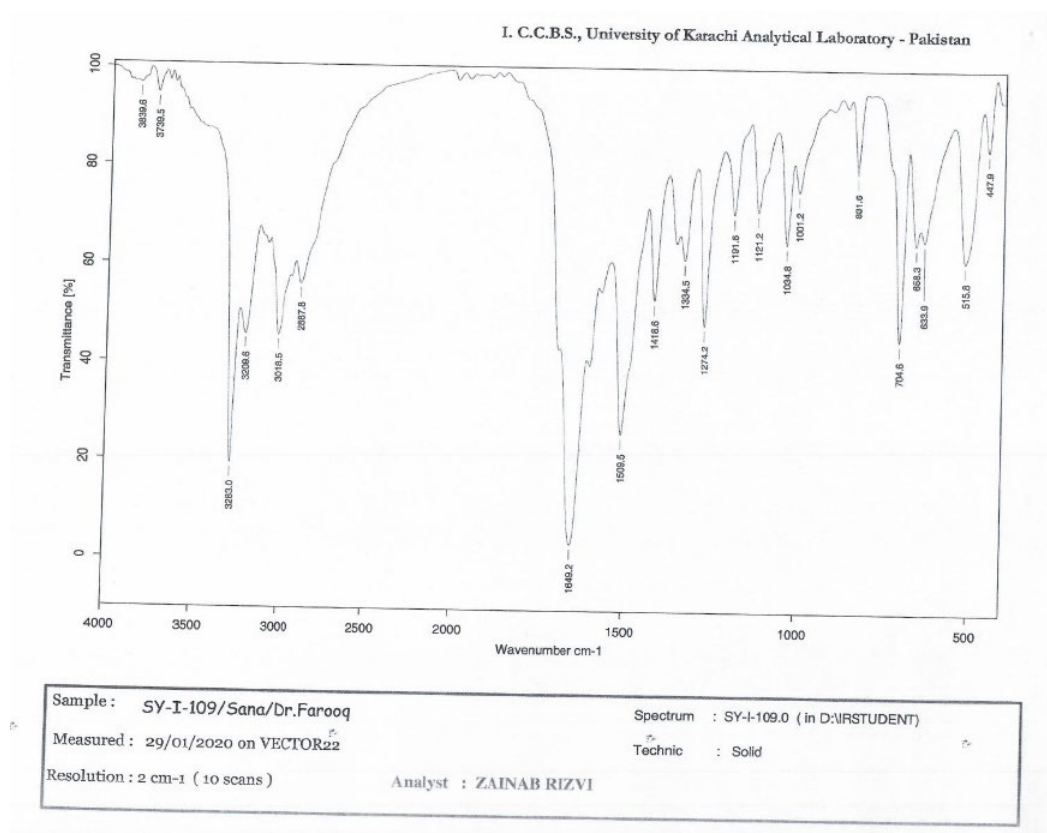

Figure S1. IR spectrum of *N'*-Acetylpyridine-3-carbohydrazide (3)

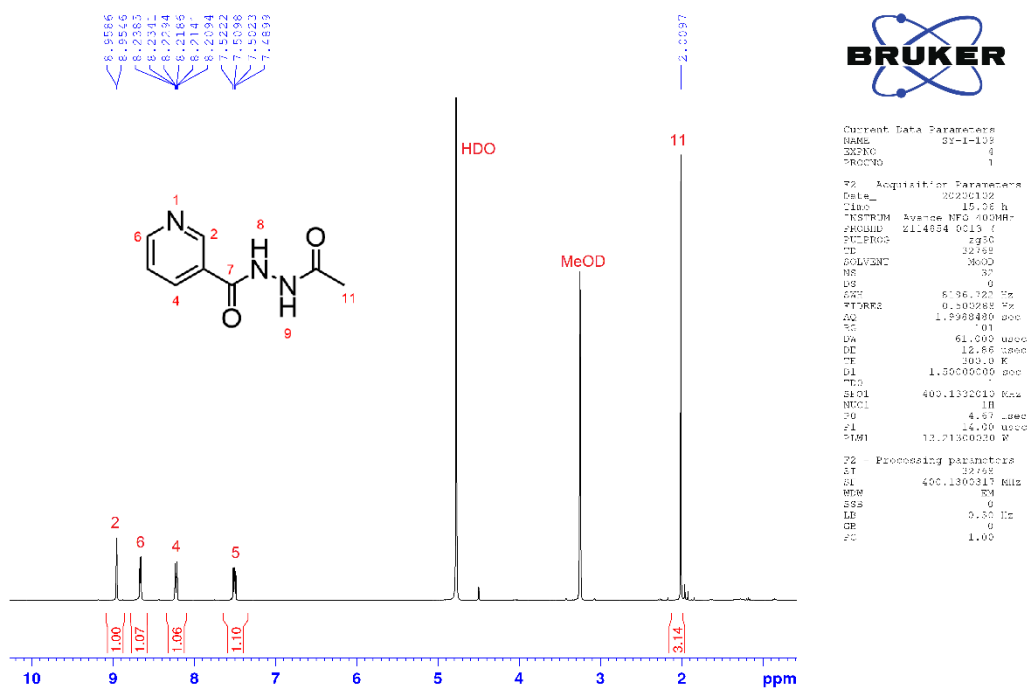

Figure S2. <sup>1</sup>H-NMR spectrum of *N'*-Acetylpyridine-3-carbohydrazide (3)

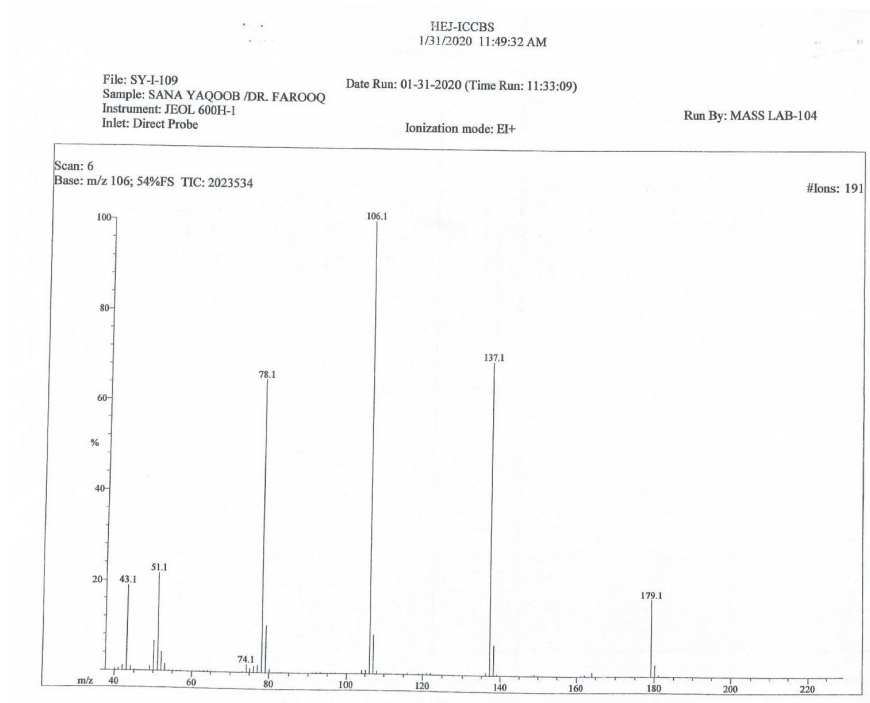

Figure S3. LR-MS (EI) spectrum of *N'*-Acetylpridine-3-carbohydrazide (3)

File : D:\Data\sy-i-109-190220-c9.RAW  
Full ms [ 49.500 - 750.500 ] - Range: 67.000 - 750.500  
Scan No. 1 of 1

| Mass     | Relative Intensity | Theoretical Mass | Delta [ppm] | Delta [mmu] | RDB  | Composition                                                 |
|----------|--------------------|------------------|-------------|-------------|------|-------------------------------------------------------------|
| 67.0558  | 1.2                | 67.0548          | 15.7        | 1.1         | 2.5  | C <sub>8</sub> H <sub>8</sub>                               |
| 69.0704  | 3.3                | 69.0704          | -0.5        | -0.0        | 1.5  | C <sub>8</sub> H <sub>8</sub>                               |
| 70.0772  | 3.8                | 70.0783          | -14.4       | -1.0        | 1.0  | C <sub>8</sub> H <sub>8</sub>                               |
| 71.0853  | 2.0                | 71.0861          | -10.9       | -0.8        | 0.5  | C <sub>8</sub> H <sub>8</sub>                               |
| 74.0466  | 1.4                | 74.0480          | -16.0       | -1.2        | 1.0  | C <sub>8</sub> H <sub>8</sub> O <sub>2</sub> N <sub>2</sub> |
| 76.0176  | 15.4               | 76.0187          | -14.2       | -1.1        | 5.5  | C <sub>8</sub> H <sub>8</sub> N <sub>2</sub>                |
|          |                    | 76.0160          | 21.1        | 1.6         | 1.0  | C <sub>8</sub> H <sub>8</sub> O <sub>2</sub>                |
| 77.0255  | 38.5               | 77.0265          | -14.1       | -1.1        | 5.0  | C <sub>8</sub> H <sub>8</sub> N <sub>2</sub>                |
|          |                    | 77.0239          | 20.7        | 1.6         | 0.5  | C <sub>8</sub> H <sub>8</sub> O <sub>2</sub>                |
| 78.0332  | 69.0               | 78.0344          | -14.8       | -1.2        | 4.5  | C <sub>8</sub> H <sub>8</sub> N <sub>2</sub>                |
|          |                    | 78.0317          | 19.6        | 1.5         | 0.0  | C <sub>8</sub> H <sub>8</sub> O <sub>2</sub>                |
| 79.0402  | 12.4               | 79.0422          | -25.0       | -2.0        | 4.0  | C <sub>8</sub> H <sub>8</sub> N <sub>2</sub>                |
|          |                    | 79.0362          | 25.9        | 2.0         | 0.0  | H <sub>2</sub> O <sub>2</sub> N <sub>2</sub>                |
| 81.0699  | 1.7                | 81.0704          | -6.6        | -0.5        | 2.5  | C <sub>8</sub> H <sub>8</sub>                               |
| 83.0851  | 2.1                | 83.0861          | -11.5       | -1.0        | 1.5  | C <sub>8</sub> H <sub>8</sub>                               |
| 90.0344  | 1.4                | 90.0344          | 0.0         | 0.0         | 5.5  | C <sub>8</sub> H <sub>8</sub> N <sub>2</sub>                |
|          |                    | 90.0317          | 28.8        | 2.7         | 1.0  | C <sub>8</sub> H <sub>8</sub> O <sub>2</sub>                |
| 91.0415  | 30.5               | 91.0422          | -7.8        | -0.7        | 5.0  | C <sub>8</sub> H <sub>8</sub> N <sub>2</sub>                |
|          |                    | 91.0395          | 23.7        | 2.0         | 0.5  | C <sub>8</sub> H <sub>8</sub> O <sub>2</sub>                |
| 92.0402  | 4.3                | 92.0374          | 29.6        | 2.7         | 5.0  | C <sub>8</sub> H <sub>8</sub> N <sub>2</sub>                |
| 97.1014  | 1.4                | 97.1017          | -3.3        | -0.3        | 1.5  | C <sub>8</sub> H <sub>8</sub>                               |
| 98.0467  | 2.5                | 98.0480          | -13.5       | -1.3        | 3.0  | C <sub>8</sub> H <sub>8</sub> O <sub>2</sub> N <sub>2</sub> |
| 103.0306 | 2.4                | 103.0296         | 9.0         | 0.9         | 6.5  | C <sub>8</sub> H <sub>8</sub> N <sub>2</sub>                |
| 104.0382 | 74.1               | 104.0374         | 7.5         | 0.8         | 6.0  | C <sub>8</sub> H <sub>8</sub> N <sub>2</sub>                |
| 105.0570 | 13.1               | 105.0578         | -7.7        | -0.8        | 5.0  | C <sub>8</sub> H <sub>8</sub> N <sub>2</sub>                |
|          |                    | 105.0552         | 17.8        | 1.9         | 0.5  | C <sub>8</sub> H <sub>8</sub> O <sub>2</sub>                |
| 106.0288 | 67.4               | 106.0293         | -4.9        | -0.5        | 5.5  | C <sub>8</sub> H <sub>8</sub> O <sub>2</sub> N <sub>2</sub> |
|          |                    | 106.0266         | 20.3        | 2.2         | 1.0  | C <sub>8</sub> H <sub>8</sub> O <sub>2</sub>                |
| 107.0342 | 5.8                | 107.0344         | -2.4        | -0.3        | 0.5  | C <sub>8</sub> H <sub>8</sub> O <sub>2</sub>                |
|          |                    | 107.0331         | 10.1        | 1.1         | 1.0  | C <sub>8</sub> H <sub>8</sub> O <sub>2</sub> N <sub>2</sub> |
|          |                    | 107.0371         | -27.5       | -2.9        | 5.0  | C <sub>8</sub> H <sub>8</sub> O <sub>2</sub> N <sub>2</sub> |
| 112.1258 | 1.1                | 112.1252         | 5.5         | 0.6         | 1.0  | C <sub>8</sub> H <sub>8</sub>                               |
| 119.0481 | 6.5                | 119.0483         | -2.2        | -0.3        | 6.0  | C <sub>8</sub> H <sub>8</sub> N <sub>2</sub>                |
|          |                    | 119.0497         | -13.4       | -1.6        | 5.5  | C <sub>8</sub> H <sub>8</sub> O <sub>2</sub>                |
|          |                    | 119.0457         | 20.4        | 2.4         | 1.5  | C <sub>8</sub> H <sub>8</sub> O <sub>2</sub> N <sub>2</sub> |
| 120.0331 | 2.7                | 120.0324         | 5.9         | 0.7         | 6.0  | C <sub>8</sub> H <sub>8</sub> O <sub>2</sub> N <sub>2</sub> |
|          |                    | 120.0297         | 28.2        | 3.4         | 1.5  | C <sub>8</sub> H <sub>8</sub> O <sub>2</sub> N <sub>2</sub> |
| 123.0321 | 1.6                | 123.0320         | 0.7         | 0.1         | 5.0  | C <sub>8</sub> H <sub>8</sub> O <sub>2</sub> N <sub>2</sub> |
|          |                    | 123.0293         | 22.5        | 2.8         | 0.5  | C <sub>8</sub> H <sub>8</sub> O <sub>2</sub>                |
| 125.0279 | 1.7                | 125.0265         | 10.9        | 1.4         | 9.0  | C <sub>8</sub> H <sub>8</sub> N <sub>2</sub>                |
| 137.0590 | 24.3               | 137.0589         | 0.4         | 0.1         | 5.0  | C <sub>8</sub> H <sub>8</sub> O <sub>2</sub> N <sub>2</sub> |
|          |                    | 137.0603         | -9.4        | -1.3        | 4.5  | C <sub>8</sub> H <sub>8</sub> O <sub>2</sub>                |
|          |                    | 137.0562         | 20.0        | 2.7         | 0.5  | C <sub>8</sub> H <sub>8</sub> O <sub>2</sub> N <sub>2</sub> |
| 138.0622 | 2.1                | 138.0641         | -13.7       | -1.9        | 0.0  | C <sub>8</sub> H <sub>8</sub> O <sub>2</sub> N <sub>2</sub> |
| 146.0333 | 1.4                | 146.0328         | 4.0         | 0.6         | 3.0  | C <sub>8</sub> H <sub>8</sub> O <sub>2</sub> N <sub>2</sub> |
|          |                    | 146.0354         | -14.4       | -2.1        | 7.5  | C <sub>8</sub> H <sub>8</sub> O <sub>2</sub>                |
|          |                    | 146.0368         | -23.6       | -3.4        | 7.0  | C <sub>8</sub> H <sub>8</sub> O <sub>2</sub>                |
| 147.0417 | 1.4                | 147.0406         | 7.4         | 1.1         | 2.5  | C <sub>8</sub> H <sub>8</sub> O <sub>2</sub> N <sub>2</sub> |
|          |                    | 147.0433         | -10.8       | -1.6        | 7.0  | C <sub>8</sub> H <sub>8</sub> O <sub>2</sub> N <sub>2</sub> |
|          |                    | 147.0446         | -19.9       | -2.9        | 6.5  | C <sub>8</sub> H <sub>8</sub> O <sub>2</sub>                |
| 149.0230 | 1.8                | 149.0225         | 3.0         | 0.4         | 7.0  | C <sub>8</sub> H <sub>8</sub> O <sub>2</sub> N <sub>2</sub> |
|          |                    | 149.0239         | -6.1        | -0.9        | 6.5  | C <sub>8</sub> H <sub>8</sub> O <sub>2</sub>                |
|          |                    | 149.0198         | 20.9        | 3.1         | 2.5  | C <sub>8</sub> H <sub>8</sub> O <sub>2</sub> N <sub>2</sub> |
|          |                    | 149.0265         | -24.0       | -3.6        | 11.0 | C <sub>8</sub> H <sub>8</sub> N <sub>2</sub>                |
| 161.0573 | 88.0               | 161.0562         | 6.6         | 1.1         | 2.5  | C <sub>8</sub> H <sub>8</sub> O <sub>2</sub> N <sub>2</sub> |
|          |                    | 161.0589         | -10.0       | -1.6        | 7.0  | C <sub>8</sub> H <sub>8</sub> O <sub>2</sub> N <sub>2</sub> |
|          |                    | 161.0603         | -18.3       | -3.0        | 6.5  | C <sub>8</sub> H <sub>8</sub> O <sub>2</sub>                |
| 162.0611 | 9.2                | 162.0641         | -19.2       | -2.9        | 2.0  | C <sub>8</sub> H <sub>8</sub> O <sub>2</sub> N <sub>2</sub> |
| 179.0688 | 6.6                | 179.0695         | -3.7        | -0.7        | 6.0  | C <sub>8</sub> H <sub>8</sub> O <sub>2</sub> N <sub>2</sub> |
|          |                    | 179.0708         | -11.2       | -2.0        | 5.5  | C <sub>8</sub> H <sub>8</sub> O <sub>2</sub>                |
|          |                    | 179.0668         | 11.2        | 2.0         | 1.5  | C <sub>8</sub> H <sub>8</sub> O <sub>2</sub> N <sub>2</sub> |
|          |                    | 179.0735         | -26.2       | -4.7        | 10.0 | C <sub>8</sub> H <sub>8</sub> N <sub>2</sub>                |

Figure S4. HR-MS (EI) spectral data of *N'*-Acetylpridine-3-carbohydrazide (3)



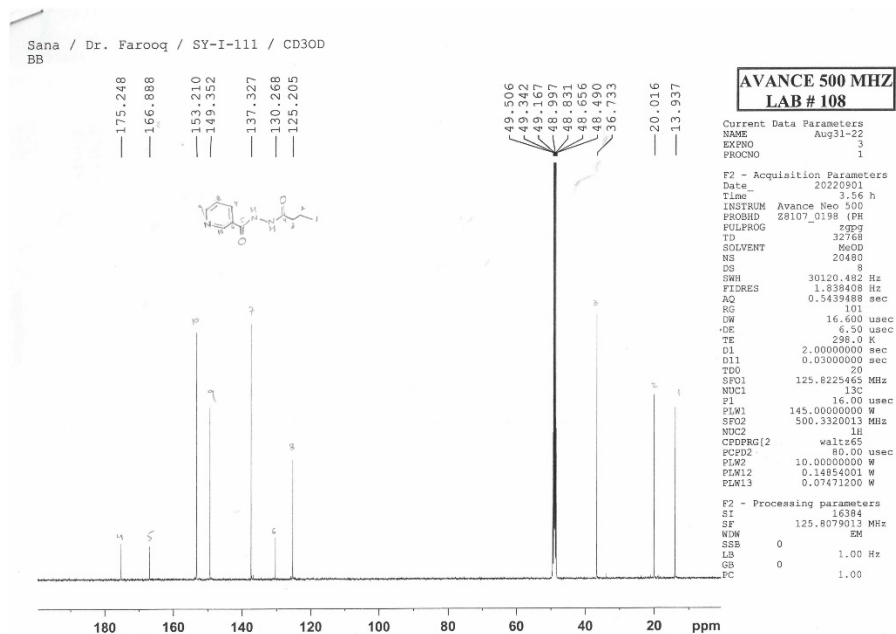

Figure S7.  $^{13}\text{C}$  NMR spectrum of *N'*-Butyrylpyridine-3-carbohydrazide (4)

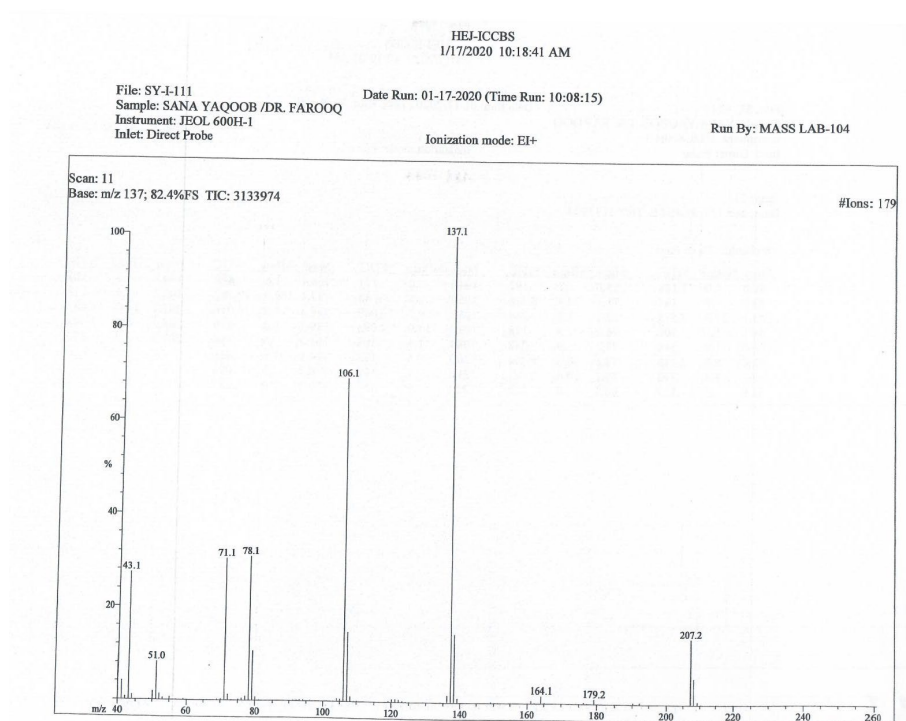

Figure S8. LR-MS (EI) spectrum of *N'*-Butyrylpyridine-3-carbohydrazide (4)

File : D:\Data\sy-i-111\_170220-c4.RAW  
Full ms [ 49.500 - 750.500 ] - Range: 49.500 - 750.500  
Scan No. 1 of 1

| Mass     | Relative Intensity | Theoretical Mass | Delta [ppm] | Delta [mmu] | RDB | Composition                                                  |
|----------|--------------------|------------------|-------------|-------------|-----|--------------------------------------------------------------|
| 50.9907  | 3.2                |                  |             |             |     |                                                              |
| 52.0214  | 3.4                |                  |             |             |     |                                                              |
| 52.0324  | 2.6                | 52.0313          | 21.1        | 1.1         | 3.0 | C <sub>4</sub> H <sub>4</sub>                                |
| 53.0164  | 1.0                |                  |             |             |     |                                                              |
| 53.0402  | 1.1                | 53.0391          | 19.7        | 1.0         | 2.5 | C <sub>4</sub> H <sub>3</sub>                                |
| 55.0422  | 3.2                | 55.0422          | 0.2         | 0.0         | 2.0 | C <sub>3</sub> H <sub>2</sub> N <sub>1</sub>                 |
| 55.0784  | 3.0                |                  |             |             |     |                                                              |
| 57.0981  | 1.9                |                  |             |             |     |                                                              |
| 60.0476  | 4.0                |                  |             |             |     |                                                              |
| 62.0386  | 1.9                | 62.0368          | 29.9        | 1.9         | 0.0 | C <sub>2</sub> H <sub>4</sub> O <sub>2</sub>                 |
| 63.0435  | 3.6                | 63.0433          | 3.5         | 0.2         | 0.0 | H <sub>5</sub> O <sub>1</sub> N <sub>3</sub>                 |
| 64.0360  | 2.5                |                  |             |             |     |                                                              |
| 64.0466  | 2.2                |                  |             |             |     |                                                              |
| 65.0405  | 1.4                | 65.0391          | 21.4        | 1.4         | 3.5 | C <sub>8</sub> H <sub>5</sub>                                |
| 69.0335  | 1.9                | 69.0340          | -7.9        | -0.5        | 2.5 | C <sub>4</sub> H <sub>5</sub> O <sub>1</sub>                 |
|          |                    | 69.0327          | 11.6        | 0.8         | 3.0 | C <sub>2</sub> H <sub>3</sub> N <sub>3</sub>                 |
| 70.0378  | 1.9                |                  |             |             |     |                                                              |
| 70.0740  | 1.4                |                  |             |             |     |                                                              |
| 71.0420  | 17.5               |                  |             |             |     |                                                              |
| 72.0423  | 1.0                |                  |             |             |     |                                                              |
| 73.0146  | 1.4                | 73.0164          | -24.9       | -1.8        | 2.0 | C <sub>2</sub> H <sub>3</sub> O <sub>2</sub> N <sub>1</sub>  |
| 74.9918  | 2.4                |                  |             |             |     |                                                              |
| 75.9953  | 4.6                | 75.9949          | 4.5         | 0.3         | 6.0 | C <sub>5</sub> O <sub>1</sub>                                |
| 77.0002  | 11.7               | 76.9987          | 19.8        | 1.5         | 1.5 | H <sub>1</sub> O <sub>3</sub> N <sub>2</sub>                 |
| 78.0064  | 44.9               | 78.0065          | -2.2        | -0.2        | 1.0 | H <sub>2</sub> O <sub>3</sub> N <sub>2</sub>                 |
| 79.0108  | 5.9                |                  |             |             |     |                                                              |
| 91.0370  | 18.1               | 91.0382          | -12.5       | -1.1        | 1.0 | C <sub>2</sub> H <sub>3</sub> O <sub>2</sub> N <sub>3</sub>  |
|          |                    | 91.0395          | -27.2       | -2.5        | 0.5 | C <sub>3</sub> H <sub>7</sub> O <sub>3</sub>                 |
| 92.0395  | 2.9                | 92.0374          | 22.8        | 2.1         | 5.0 | C <sub>5</sub> H <sub>4</sub> N <sub>2</sub>                 |
| 103.0303 | 1.0                | 103.0296         | 6.3         | 0.7         | 6.5 | C <sub>6</sub> H <sub>3</sub> N <sub>2</sub>                 |
| 104.0398 | 20.2               | 104.0374         | 23.1        | 2.4         | 6.0 | C <sub>6</sub> H <sub>4</sub> N <sub>2</sub>                 |
| 105.0210 | 5.6                | 105.0215         | -4.8        | -0.5        | 6.0 | C <sub>6</sub> H <sub>3</sub> O <sub>1</sub> N <sub>1</sub>  |
|          |                    | 105.0188         | 20.7        | 2.2         | 1.5 | C <sub>3</sub> H <sub>5</sub> O <sub>4</sub>                 |
| 105.0520 | 4.5                | 105.0538         | -17.5       | -1.8        | 1.0 | C <sub>2</sub> H <sub>7</sub> O <sub>2</sub> N <sub>3</sub>  |
| 106.0287 | 46.1               | 106.0293         | -5.4        | -0.6        | 5.5 | C <sub>6</sub> H <sub>4</sub> O <sub>1</sub> N <sub>1</sub>  |
|          |                    | 106.0266         | 19.9        | 2.1         | 1.0 | C <sub>3</sub> H <sub>6</sub> O <sub>4</sub>                 |
| 107.0335 | 4.9                | 107.0331         | 3.7         | 0.4         | 1.0 | C <sub>1</sub> H <sub>5</sub> O <sub>3</sub> N <sub>3</sub>  |
|          |                    | 107.0344         | -8.9        | -0.9        | 0.5 | C <sub>3</sub> H <sub>7</sub> O <sub>4</sub>                 |
| 117.0578 | 2.0                | 117.0578         | -0.4        | -0.0        | 6.0 | C <sub>3</sub> H <sub>7</sub> N <sub>1</sub>                 |
|          |                    | 117.0552         | 22.5        | 2.6         | 1.5 | C <sub>3</sub> H <sub>9</sub> O <sub>3</sub>                 |
| 118.0650 | 3.7                | 118.0657         | -5.4        | -0.6        | 5.5 | C <sub>3</sub> H <sub>8</sub> N <sub>1</sub>                 |
|          |                    | 118.0630         | 17.3        | 2.0         | 1.0 | C <sub>3</sub> H <sub>10</sub> O <sub>3</sub>                |
|          |                    | 118.0617         | 28.7        | 3.4         | 1.5 | C <sub>3</sub> H <sub>9</sub> O <sub>2</sub> N <sub>3</sub>  |
| 119.0431 | 9.3                | 119.0457         | -21.6       | -2.6        | 1.5 | C <sub>3</sub> H <sub>7</sub> O <sub>3</sub> N <sub>2</sub>  |
| 120.0378 | 2.0                | 120.0409         | -26.2       | -3.1        | 1.5 | C <sub>3</sub> H <sub>6</sub> O <sub>3</sub> N <sub>3</sub>  |
| 122.0478 | 1.6                | 122.0480         | -1.6        | -0.2        | 5.0 | C <sub>3</sub> H <sub>6</sub> O <sub>3</sub> N <sub>2</sub>  |
|          |                    | 122.0453         | 20.4        | 2.5         | 0.5 | C <sub>3</sub> H <sub>8</sub> O <sub>1</sub> N <sub>2</sub>  |
| 123.0315 | 7.8                | 123.0320         | -4.4        | -0.5        | 5.0 | C <sub>3</sub> H <sub>7</sub> O <sub>4</sub> N <sub>1</sub>  |
|          |                    | 123.0293         | 17.4        | 2.1         | 0.5 | C <sub>2</sub> H <sub>5</sub> O <sub>2</sub> N <sub>1</sub>  |
|          |                    | 123.0280         | 28.3        | 3.5         | 1.0 | C <sub>2</sub> H <sub>7</sub> O <sub>5</sub>                 |
| 130.0656 | 1.4                | 130.0657         | -0.9        | -0.1        | 6.5 | C <sub>2</sub> H <sub>6</sub> O <sub>4</sub> N <sub>3</sub>  |
|          |                    | 130.0630         | 19.8        | 2.6         | 2.0 | C <sub>2</sub> H <sub>9</sub> N <sub>1</sub>                 |
| 132.0807 | 1.2                | 132.0813         | -4.6        | -0.6        | 5.5 | C <sub>6</sub> H <sub>10</sub> O <sub>3</sub>                |
|          |                    | 132.0786         | 15.7        | 2.1         | 1.0 | C <sub>6</sub> H <sub>10</sub> N <sub>1</sub>                |
|          |                    | 132.0773         | 25.8        | 3.4         | 1.5 | C <sub>6</sub> H <sub>12</sub> O <sub>2</sub> N <sub>3</sub> |
| 137.0585 | 17.8               | 137.0589         | -3.2        | -0.4        | 5.0 | C <sub>6</sub> H <sub>7</sub> O <sub>1</sub> N <sub>3</sub>  |
|          |                    | 137.0603         | -13.0       | -1.8        | 4.5 | C <sub>6</sub> H <sub>9</sub> O <sub>2</sub>                 |
|          |                    | 137.0562         | 16.4        | 2.2         | 0.5 | C <sub>6</sub> H <sub>8</sub> O <sub>3</sub>                 |
| 138.0615 | 2.0                | 138.0641         | -18.5       | -2.6        | 0.0 | C <sub>3</sub> H <sub>4</sub> O <sub>4</sub> N <sub>2</sub>  |
| 149.0210 | 2.9                | 149.0198         | 7.5         | 1.1         | 2.5 | C <sub>3</sub> H <sub>10</sub> O <sub>4</sub> N <sub>2</sub> |
|          |                    | 149.0225         | -10.4       | -1.6        | 7.0 | C <sub>3</sub> H <sub>5</sub> O <sub>2</sub> N <sub>2</sub>  |
|          |                    | 149.0239         | -19.5       | -2.9        | 6.5 | C <sub>6</sub> H <sub>3</sub> O <sub>1</sub> N <sub>3</sub>  |
| 161.0570 | 100.0              | 161.0562         | 5.0         | 0.8         | 2.5 | C <sub>6</sub> H <sub>2</sub> O <sub>1</sub>                 |
|          |                    | 161.0589         | -11.6       | -1.9        | 7.0 | C <sub>6</sub> H <sub>9</sub> O <sub>1</sub> N <sub>2</sub>  |
|          |                    | 161.0603         | -20.0       | -3.2        | 6.5 | C <sub>6</sub> H <sub>7</sub> O <sub>1</sub> N <sub>3</sub>  |
| 162.0591 | 8.9                | 162.0555         | 22.2        | 3.6         | 6.5 | C <sub>10</sub> H <sub>7</sub> O <sub>2</sub>                |
| 167.0326 | 1.0                | 167.0331         | -3.1        | -0.5        | 6.0 | C <sub>6</sub> H <sub>8</sub> O <sub>2</sub> N <sub>1</sub>  |

| Mass     | Relative Intensity | Theoretical Mass | Delta [ppm] | Delta [mmu] | RDB  | Composition                                                   |
|----------|--------------------|------------------|-------------|-------------|------|---------------------------------------------------------------|
|          |                    | 167.0344         | -11.1       | -1.9        | 5.5  | C <sub>9</sub> H <sub>4</sub> O <sub>1</sub>                  |
|          |                    | 167.0371         | -27.2       | -4.5        | 10.0 | C <sub>11</sub> H <sub>4</sub> O <sub>1</sub> N <sub>1</sub>  |
| 174.0670 | 7.2                | 174.0667         | 1.4         | 0.2         | 7.5  | C <sub>9</sub> H <sub>4</sub> O <sub>1</sub> N <sub>1</sub>   |
|          |                    | 174.0681         | -6.4        | -1.1        | 7.0  | C <sub>11</sub> H <sub>10</sub> O <sub>2</sub>                |
|          |                    | 174.0641         | 16.8        | 2.9         | 3.0  | C <sub>8</sub> H <sub>10</sub> O <sub>4</sub> N <sub>2</sub>  |
| 187.0746 | 3.1                | 187.0746         | 0.2         | 0.0         | 8.0  | C <sub>10</sub> H <sub>8</sub> O <sub>1</sub> N <sub>3</sub>  |
|          |                    | 187.0759         | -7.0        | -1.3        | 7.5  | C <sub>11</sub> H <sub>11</sub> O <sub>2</sub>                |
|          |                    | 187.0719         | 14.5        | 2.7         | 3.5  | C <sub>7</sub> H <sub>11</sub> O <sub>1</sub> N <sub>2</sub>  |
| 188.0808 | 1.9                | 188.0797         | 5.7         | 1.1         | 3.0  | C <sub>6</sub> H <sub>10</sub> O <sub>1</sub> N <sub>1</sub>  |
|          |                    | 188.0824         | -8.5        | -1.6        | 7.5  | C <sub>10</sub> H <sub>10</sub> O <sub>1</sub> N <sub>3</sub> |
|          |                    | 188.0837         | -15.7       | -3.0        | 7.0  | C <sub>12</sub> H <sub>11</sub> O <sub>2</sub>                |
| 189.0899 | 7.4                | 189.0902         | -1.5        | -0.3        | 7.0  | C <sub>10</sub> H <sub>11</sub> O <sub>1</sub> N <sub>3</sub> |
|          |                    | 189.0916         | -8.6        | -1.6        | 6.5  | C <sub>10</sub> H <sub>10</sub> O <sub>2</sub>                |
|          |                    | 189.0875         | 12.7        | 2.4         | 2.5  | C <sub>6</sub> H <sub>11</sub> O <sub>1</sub> N <sub>2</sub>  |
| 190.0924 | 1.2                | 190.0954         | -15.5       | -3.0        | 2.0  | C <sub>7</sub> H <sub>14</sub> O <sub>1</sub> N <sub>2</sub>  |
|          |                    | 190.0868         | 29.5        | 5.6         | 6.5  | C <sub>11</sub> H <sub>12</sub> O <sub>2</sub> N <sub>1</sub> |
|          |                    | 190.0980         | -29.6       | -5.6        | 6.5  | C <sub>10</sub> H <sub>12</sub> O <sub>1</sub> N <sub>3</sub> |
| 207.1004 | 1.6                | 207.1008         | -2.0        | -0.4        | 6.0  | C <sub>10</sub> H <sub>13</sub> O <sub>2</sub> N <sub>3</sub> |
|          |                    | 207.1021         | -8.4        | -1.7        | 5.5  | C <sub>12</sub> H <sub>15</sub> O <sub>3</sub>                |
|          |                    | 207.0981         | 11.0        | 2.3         | 1.5  | C <sub>7</sub> H <sub>15</sub> O <sub>1</sub> N <sub>2</sub>  |
|          |                    | 207.1048         | -21.4       | -4.4        | 10.0 | C <sub>15</sub> H <sub>13</sub> N <sub>1</sub>                |

Figure S9. HR-MS (EI) spectral data of *N*'-Butyrylpridine-3-carbohydrazide (4)



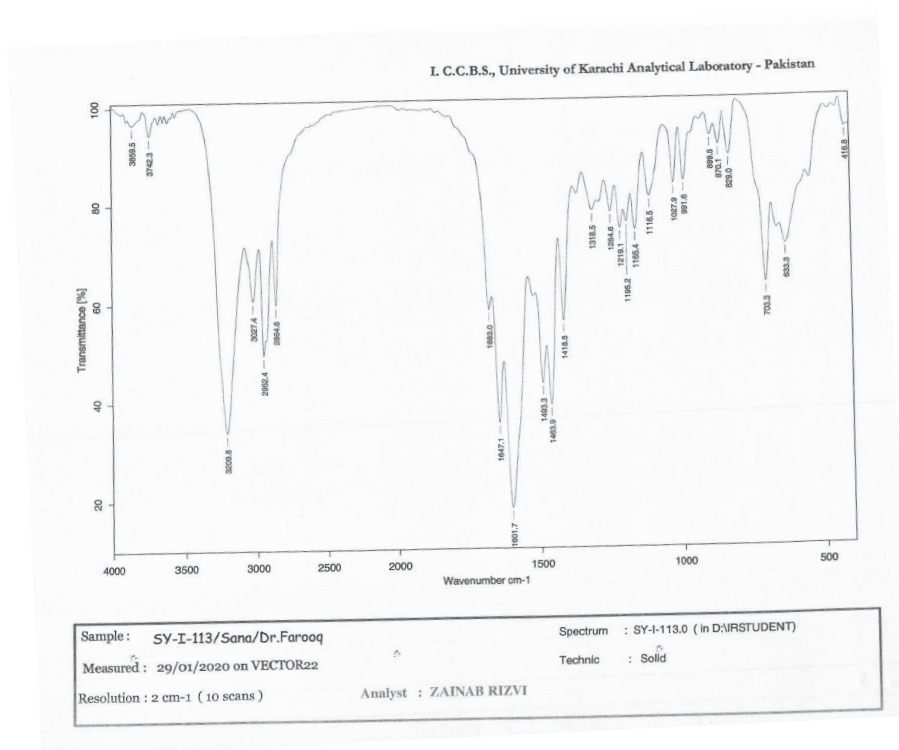

Figure S10. IR spectrum of *N'*-Hexanoylpyridine-3-carbohydrazide (5)

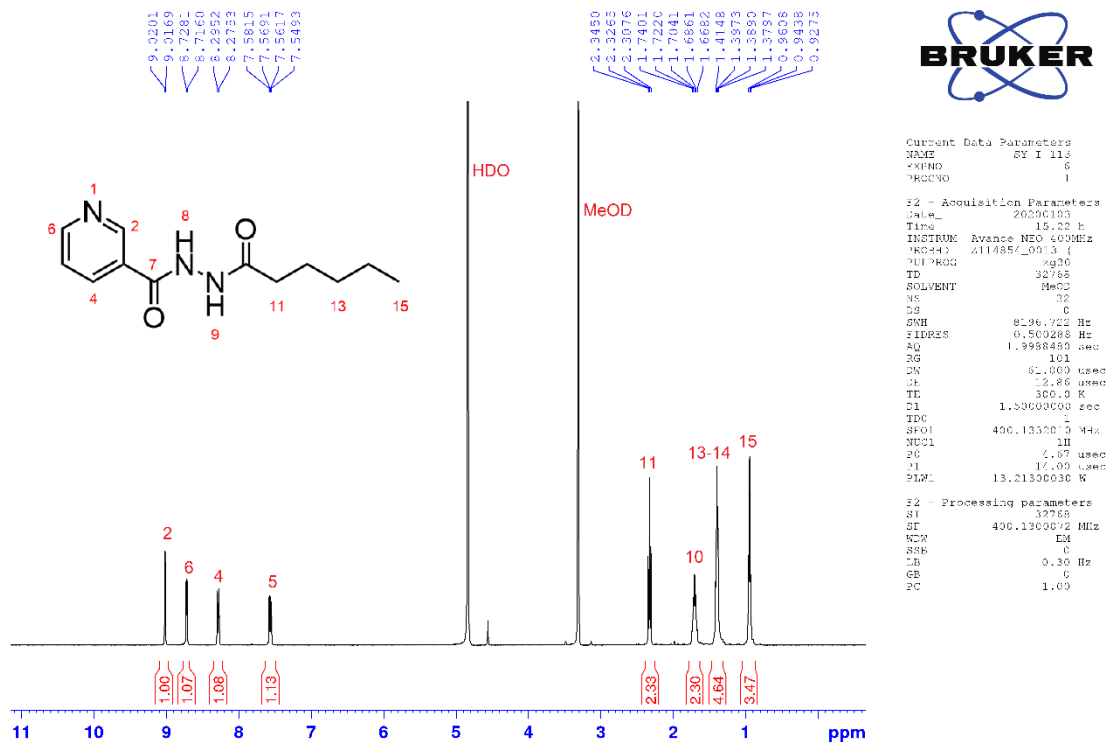

Figure S11.  $^1\text{H}$  NMR spectrum of *N'*-Hexanoylpyridine-3-carbohydrazide (5)



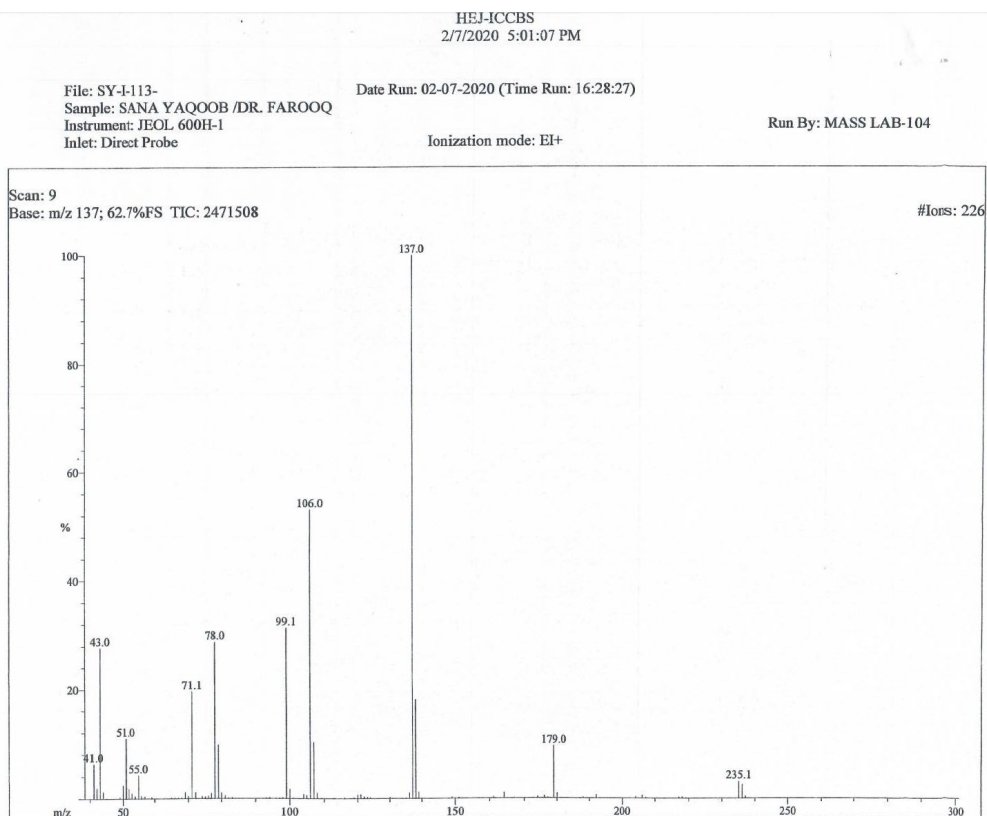

**Figure S12.** LR-MS (EI) spectrum of *N'*-Hexanoylpyridine-3-carbohydrazide (**5**)

| File : D:\Data\ay-1-113_180220-cl.RAW                  |                       |                     |                |                |     |                                                             |
|--------------------------------------------------------|-----------------------|---------------------|----------------|----------------|-----|-------------------------------------------------------------|
| Full ms [ 49.500 - 750.500 ] - Range: 76.000 - 750.500 |                       |                     |                |                |     |                                                             |
| Scan No. 1 of 1                                        |                       |                     |                |                |     |                                                             |
| Mass                                                   | Relative<br>Intensity | Theoretical<br>Mass | Delta<br>[ppm] | Delta<br>[mmu] | RDB | Composition                                                 |
| 76.0171                                                | 3.3                   | 76.0160             | 13.9           | 1.1            | 1.0 | C <sub>5</sub> H <sub>6</sub> O <sub>3</sub>                |
| 77.0255                                                | 8.6                   | 77.0239             | 20.9           | 1.6            | 0.5 | C <sub>5</sub> H <sub>6</sub> O <sub>3</sub>                |
| 78.0336                                                | 37.1                  | 78.0317             | 24.7           | 1.9            | 0.0 | C <sub>5</sub> H <sub>6</sub> O <sub>3</sub>                |
| 79.0399                                                | 5.5                   | 79.0382             | 21.5           | 1.7            | 0.0 | H <sub>5</sub> O <sub>2</sub> H <sub>3</sub>                |
| 80.0490                                                | 0.9                   |                     |                |                |     |                                                             |
| 81.0704                                                | 1.1                   |                     |                |                |     |                                                             |
| 82.0663                                                | 1.5                   |                     |                |                |     |                                                             |
| 83.0510                                                | 0.5                   |                     |                |                |     |                                                             |
| 83.0852                                                | 0.9                   |                     |                |                |     |                                                             |
| 84.0447                                                | 0.7                   |                     |                |                |     |                                                             |
| 87.0423                                                | 0.7                   | 87.0446             | -26.6          | -2.3           | 1.5 | C <sub>5</sub> H <sub>6</sub> O <sub>2</sub>                |
| 90.0350                                                | 1.0                   |                     |                |                |     |                                                             |
| 91.0421                                                | 6.2                   | 91.0395             | 28.5           | 2.6            | 0.5 | C <sub>5</sub> H <sub>6</sub> O <sub>3</sub>                |
| 92.0392                                                | 2.6                   |                     |                |                |     |                                                             |
| 93.0463                                                | 1.0                   |                     |                |                |     |                                                             |
| 94.0608                                                | 0.6                   |                     |                |                |     |                                                             |
| 95.0764                                                | 0.7                   |                     |                |                |     |                                                             |
| 96.0818                                                | 3.3                   |                     |                |                |     |                                                             |
| 97.0646                                                | 0.5                   |                     |                |                |     |                                                             |
| 97.0995                                                | 0.5                   |                     |                |                |     |                                                             |
| 98.0477                                                | 8.8                   |                     |                |                |     |                                                             |
| 99.0514                                                | 0.6                   |                     |                |                |     |                                                             |
| 99.0800                                                | 13.4                  |                     |                |                |     |                                                             |
| 100.0830                                               | 1.0                   |                     |                |                |     |                                                             |
| 103.0302                                               | 0.9                   |                     |                |                |     |                                                             |
| 104.0398                                               | 18.3                  |                     |                |                |     |                                                             |
| 105.0231                                               | 3.7                   |                     |                |                |     |                                                             |
| 105.0445                                               | 4.5                   | 105.0426            | 18.0           | 1.9            | 1.0 | C <sub>5</sub> H <sub>6</sub> O <sub>3</sub> N <sub>2</sub> |
| 106.0281                                               | 39.8                  | 106.0266            | 14.2           | 1.5            | 1.0 | C <sub>5</sub> H <sub>6</sub> O <sub>3</sub> N <sub>2</sub> |
|                                                        |                       | 106.0253            | 26.8           | 2.8            | 1.5 | C <sub>5</sub> H <sub>6</sub> O <sub>3</sub> N <sub>2</sub> |
|                                                        |                       | 107.0331            | 2.6            | 0.3            | 1.0 | C <sub>5</sub> H <sub>6</sub> O <sub>3</sub> N <sub>2</sub> |
| 107.0334                                               | 5.2                   | 107.0344            | -9.9           | -1.1           | 0.5 | C <sub>5</sub> H <sub>6</sub> O <sub>3</sub> N <sub>2</sub> |
|                                                        |                       | 108.0409            | -18.5          | -2.0           | 0.5 | C <sub>5</sub> H <sub>6</sub> O <sub>3</sub> N <sub>2</sub> |
| 108.0369                                               | 0.5                   |                     |                |                |     |                                                             |
| 111.0544                                               | 5.8                   |                     |                |                |     |                                                             |
| 111.0900                                               | 0.9                   |                     |                |                |     |                                                             |
| 112.0625                                               | 1.5                   |                     |                |                |     |                                                             |
| 116.0576                                               | 1.1                   | 116.0586            | -8.4           | -1.0           | 2.0 | C <sub>5</sub> H <sub>6</sub> O <sub>3</sub> N <sub>2</sub> |
| 117.0583                                               | 1.3                   | 117.0552            | 26.8           | 3.1            | 1.5 | C <sub>5</sub> H <sub>6</sub> O <sub>3</sub> N <sub>2</sub> |
| 118.0643                                               | 3.0                   | 118.0630            | 10.9           | 1.3            | 1.0 | C <sub>5</sub> H <sub>6</sub> O <sub>3</sub> N <sub>2</sub> |
|                                                        |                       | 118.0617            | 22.3           | 2.6            | 1.5 | C <sub>5</sub> H <sub>6</sub> O <sub>3</sub> N <sub>2</sub> |
| 119.0482                                               | 14.8                  | 119.0457            | 21.0           | 2.5            | 1.9 | C <sub>5</sub> H <sub>6</sub> O <sub>3</sub> N <sub>2</sub> |
| 120.0551                                               | 4.9                   | 120.0535            | 13.5           | 1.6            | 1.0 | C <sub>5</sub> H <sub>6</sub> O <sub>3</sub> N <sub>2</sub> |
| 121.0458                                               | 0.9                   | 121.0487            | -24.2          | -2.9           | 1.0 | C <sub>5</sub> H <sub>6</sub> O <sub>3</sub> N <sub>2</sub> |
| 122.0475                                               | 2.7                   | 122.0453            | 17.4           | 2.1            | 0.5 | C <sub>5</sub> H <sub>6</sub> O <sub>3</sub> N <sub>2</sub> |
|                                                        |                       | 122.0440            | 28.4           | 3.5            | 1.0 | C <sub>5</sub> H <sub>6</sub> O <sub>3</sub> N <sub>2</sub> |
| 123.0342                                               | 5.3                   | 123.0320            | 17.3           | 2.1            | 5.0 | C <sub>5</sub> H <sub>6</sub> O <sub>3</sub> N <sub>2</sub> |
| 123.0534                                               | 4.8                   | 123.0532            | 2.1            | 0.3            | 0.0 | C <sub>5</sub> H <sub>6</sub> O <sub>3</sub> N <sub>2</sub> |
|                                                        |                       | 123.0518            | 13.0           | 1.6            | 0.5 | C <sub>5</sub> H <sub>6</sub> O <sub>3</sub> N <sub>2</sub> |
| 124.0386                                               | 0.5                   | 124.0399            | -9.7           | -1.2           | 4.5 | C <sub>5</sub> H <sub>6</sub> O <sub>3</sub> N <sub>2</sub> |
|                                                        |                       | 124.0358            | 22.7           | 2.8            | 0.5 | C <sub>5</sub> H <sub>6</sub> O <sub>3</sub> N <sub>2</sub> |
|                                                        |                       | 124.0596            | -13.4          | -1.7           | 0.0 | C <sub>5</sub> H <sub>6</sub> O <sub>3</sub> N <sub>2</sub> |
| 124.0580                                               | 0.5                   |                     |                |                |     |                                                             |
| 125.0723                                               | 2.0                   |                     |                |                |     |                                                             |
| 130.0654                                               | 0.6                   | 130.0630            | 18.1           | 2.4            | 2.0 | C <sub>5</sub> H <sub>6</sub> O <sub>3</sub> N <sub>2</sub> |
|                                                        |                       | 130.0617            | 28.5           | 3.7            | 2.5 | C <sub>5</sub> H <sub>6</sub> O <sub>3</sub> N <sub>2</sub> |
| 130.1110                                               | 1.0                   |                     |                |                |     |                                                             |
| 131.0611                                               | 1.0                   | 131.0582            | 21.8           | 2.9            | 2.0 | C <sub>5</sub> H <sub>6</sub> O <sub>3</sub> N <sub>2</sub> |
| 132.0525                                               | 1.2                   | 132.0535            | -7.6           | -1.0           | 2.0 | C <sub>5</sub> H <sub>6</sub> O <sub>3</sub> N <sub>2</sub> |
| 133.0623                                               | 0.6                   | 133.0613            | 7.4            | 1.0            | 1.5 | C <sub>5</sub> H <sub>6</sub> O <sub>3</sub> N <sub>2</sub> |
| 137.0575                                               | 29.9                  | 137.0562            | 9.4            | 1.3            | 0.5 | C <sub>5</sub> H <sub>6</sub> O <sub>3</sub> N <sub>2</sub> |
|                                                        |                       | 137.0603            | -19.9          | -2.7           | 4.5 | C <sub>5</sub> H <sub>6</sub> O <sub>3</sub> N <sub>2</sub> |
| 138.0628                                               | 4.1                   | 138.0641            | -9.4           | -1.3           | 0.0 | C <sub>5</sub> H <sub>6</sub> O <sub>3</sub> N <sub>2</sub> |
| 146.0675                                               | 1.4                   | 146.0691            | -11.5          | -1.7           | 2.0 | C <sub>5</sub> H <sub>6</sub> O <sub>3</sub> N <sub>2</sub> |
| 148.0502                                               | 1.2                   | 148.0484            | 12.3           | 1.8            | 2.0 | C <sub>5</sub> H <sub>6</sub> O <sub>3</sub> N <sub>2</sub> |
|                                                        |                       | 148.0524            | -14.9          | -2.2           | 6.0 | C <sub>5</sub> H <sub>6</sub> O <sub>3</sub> N <sub>2</sub> |
| 149.0226                                               | 1.8                   | 149.0225            | 0.5            | 0.1            | 7.0 | C <sub>5</sub> H <sub>6</sub> O <sub>3</sub> N <sub>2</sub> |
|                                                        |                       | 149.0239            | -8.5           | -1.3           | 6.5 | C <sub>5</sub> H <sub>6</sub> O <sub>3</sub> N <sub>2</sub> |
| 160.0528                                               | 0.8                   | 160.0524            | 2.2            | 0.3            | 7.0 | C <sub>5</sub> H <sub>6</sub> O <sub>3</sub> N <sub>2</sub> |

  

| Mass     | Relative<br>Intensity | Theoretical<br>Mass | Delta<br>[ppm] | Delta<br>[mmu] | RDB | Composition                                                 |
|----------|-----------------------|---------------------|----------------|----------------|-----|-------------------------------------------------------------|
| 161.0592 | 100.0                 | 160.0484            | 27.3           | 4.4            | 3.0 | C <sub>5</sub> H <sub>6</sub> O <sub>3</sub> N <sub>2</sub> |
|          |                       | 161.0603            | -6.5           | -1.0           | 6.5 | C <sub>5</sub> H <sub>6</sub> O <sub>3</sub> N <sub>2</sub> |
| 162.0612 | 8.5                   | 161.0562            | 18.5           | 3.0            | 2.5 | C <sub>5</sub> H <sub>6</sub> O <sub>3</sub> N <sub>2</sub> |
| 163.0637 | 0.8                   | 162.0641            | -17.3          | -2.8           | 2.0 | C <sub>5</sub> H <sub>6</sub> O <sub>3</sub> N <sub>2</sub> |
|          |                       | 163.0633            | 2.3            | 0.4            | 6.0 | C <sub>5</sub> H <sub>6</sub> O <sub>3</sub> N <sub>2</sub> |
|          |                       | 163.0593            | 27.0           | 4.4            | 2.0 | C <sub>5</sub> H <sub>6</sub> O <sub>3</sub> N <sub>2</sub> |
| 167.0346 | 0.6                   | 167.0344            | 1.2            | 0.2            | 5.5 | C <sub>5</sub> H <sub>6</sub> O <sub>3</sub> N <sub>2</sub> |
|          |                       | 167.0331            | 9.2            | 1.5            | 6.0 | C <sub>5</sub> H <sub>6</sub> O <sub>3</sub> N <sub>2</sub> |
| 173.0573 | 0.7                   | 173.0562            | 6.4            | 1.1            | 3.5 | C <sub>5</sub> H <sub>6</sub> O <sub>3</sub> N <sub>2</sub> |
|          |                       | 173.0603            | -16.9          | -2.9           | 7.5 | C <sub>5</sub> H <sub>6</sub> O <sub>3</sub> N <sub>2</sub> |
| 174.0656 | 83.4                  | 174.0641            | 8.8            | 1.5            | 3.0 | C <sub>5</sub> H <sub>6</sub> O <sub>3</sub> N <sub>2</sub> |
|          |                       | 174.0681            | -14.3          | -2.5           | 7.0 | C <sub>5</sub> H <sub>6</sub> O <sub>3</sub> N <sub>2</sub> |
| 175.0724 | 17.6                  | 175.0719            | 2.9            | 0.5            | 2.5 | C <sub>5</sub> H <sub>6</sub> O <sub>3</sub> N <sub>2</sub> |
|          |                       | 175.0759            | -20.1          | -3.5           | 6.5 | C <sub>5</sub> H <sub>6</sub> O <sub>3</sub> N <sub>2</sub> |
| 176.0773 | 1.8                   | 176.0797            | -13.7          | -2.4           | 2.0 | C <sub>5</sub> H <sub>6</sub> O <sub>3</sub> N <sub>2</sub> |
| 179.0685 | 2.3                   | 179.0695            | -5.4           | -1.0           | 6.0 | C <sub>5</sub> H <sub>6</sub> O <sub>3</sub> N <sub>2</sub> |
|          |                       | 179.0708            | -12.9          | -2.3           | 5.5 | C <sub>5</sub> H <sub>6</sub> O <sub>3</sub> N <sub>2</sub> |
| 188.0835 | 22.2                  | 188.0837            | -1.3           | -0.2           | 7.0 | C <sub>5</sub> H <sub>6</sub> O <sub>3</sub> N <sub>2</sub> |
|          |                       | 188.0797            | 20.1           | 3.8            | 3.0 | C <sub>5</sub> H <sub>6</sub> O <sub>3</sub> N <sub>2</sub> |
| 189.0873 | 3.8                   | 189.0875            | -1.1           | -0.2           | 2.5 | C <sub>5</sub> H <sub>6</sub> O <sub>3</sub> N <sub>2</sub> |
|          |                       | 189.0916            | -22.4          | -4.2           | 6.5 | C <sub>5</sub> H <sub>6</sub> O <sub>3</sub> N <sub>2</sub> |
| 200.0816 | 1.1                   | 200.0797            | 9.2            | 1.8            | 4.0 | C <sub>5</sub> H <sub>6</sub> O <sub>3</sub> N <sub>2</sub> |
|          |                       | 200.0837            | -10.9          | -2.2           | 8.0 | C <sub>5</sub> H <sub>6</sub> O <sub>3</sub> N <sub>2</sub> |
| 202.0963 | 1.4                   | 202.0954            | 4.6            | 0.9            | 3.0 | C <sub>5</sub> H <sub>6</sub> O <sub>3</sub> N <sub>2</sub> |
|          |                       | 202.0994            | -15.3          | -3.1           | 7.0 | C <sub>5</sub> H <sub>6</sub> O <sub>3</sub> N <sub>2</sub> |
| 215.1059 | 0.9                   | 215.1072            | -6.1           | -1.3           | 7.5 | C <sub>5</sub> H <sub>6</sub> O <sub>3</sub> N <sub>2</sub> |
|          |                       | 215.1032            | 12.6           | 2.7            | 3.5 | C <sub>5</sub> H <sub>6</sub> O <sub>3</sub> N <sub>2</sub> |
| 216.1138 | 2.4                   | 216.1150            | -5.6           | -1.2           | 7.0 | C <sub>5</sub> H <sub>6</sub> O <sub>3</sub> N <sub>2</sub> |
|          |                       | 216.1110            | 13.0           | 2.8            | 3.0 | C <sub>5</sub> H <sub>6</sub> O <sub>3</sub> N <sub>2</sub> |
| 217.1215 | 10.4                  | 217.1229            | -6.1           | -1.3           | 6.5 | C <sub>5</sub> H <sub>6</sub> O <sub>3</sub> N <sub>2</sub> |
|          |                       | 217.1188            | 12.4           | 2.7            | 2.5 | C <sub>5</sub> H <sub>6</sub> O <sub>3</sub> N <sub>2</sub> |
| 218.1261 | 2.0                   | 218.1267            | -2.8           | -0.6           | 2.0 | C <sub>5</sub> H <sub>6</sub> O <sub>3</sub> N <sub>2</sub> |
|          |                       | 218.1307            | -21.2          | -4.6           | 6.0 | C <sub>5</sub> H <sub>6</sub> O <sub>3</sub> N <sub>2</sub> |
| 235.1320 | 0.6                   | 235.1321            | -0.5           | -0.1           | 6.0 | C <sub>5</sub> H <sub>6</sub> O <sub>3</sub> N <sub>2</sub> |
|          |                       | 235.1334            | -6.2           | -1.5           | 5.5 | C <sub>5</sub> H <sub>6</sub> O <sub>3</sub> N <sub>2</sub> |

Figure S13. HR-MS (EI) spectral data of N'-Hexanoylpyridine-3-carbohydrazide (5)

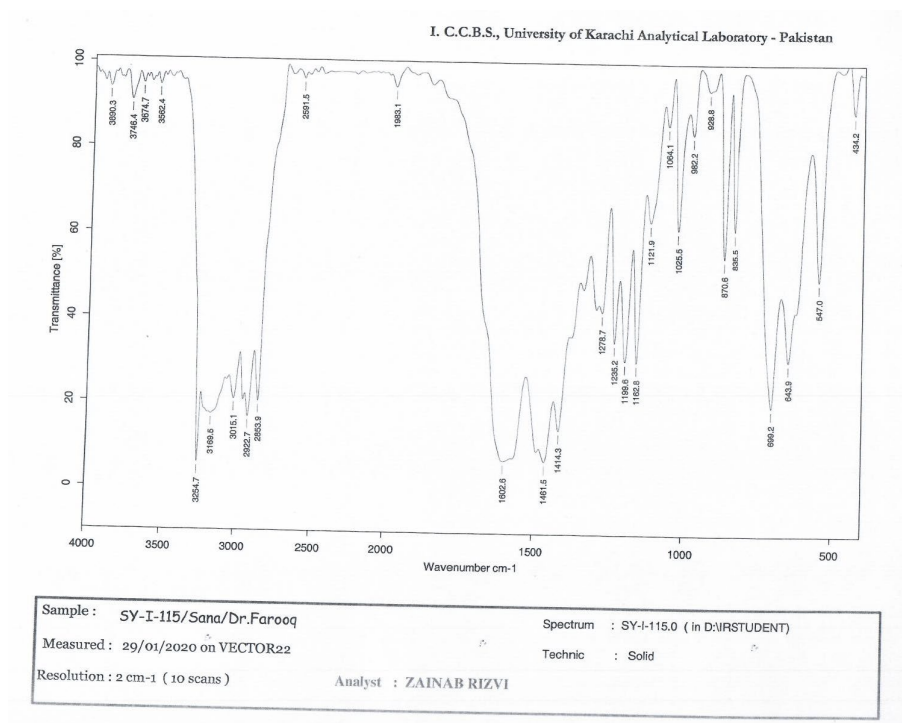

**Figure S14.** IR spectrum of *N'*-Octanoylpyridine-3-carbohydrazide (**6**)

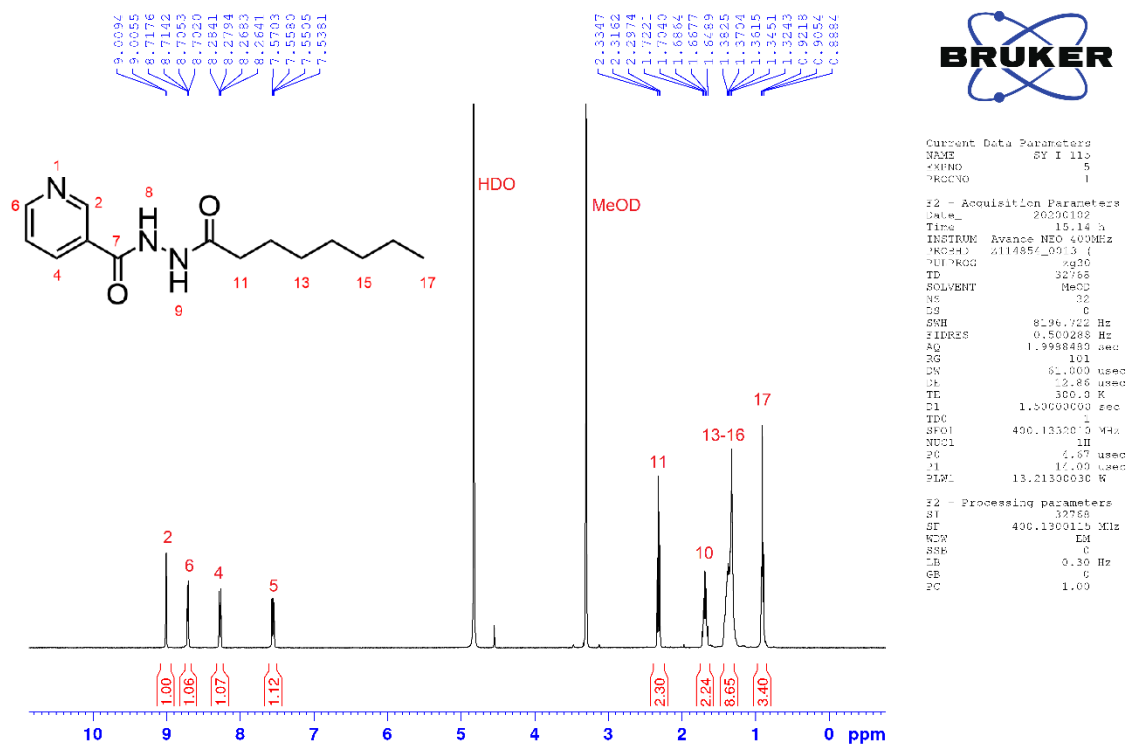

**Figure S15.** <sup>1</sup>H NMR spectrum of *N'*-Octanoylpyridine-3-carbohydrazide (**6**)

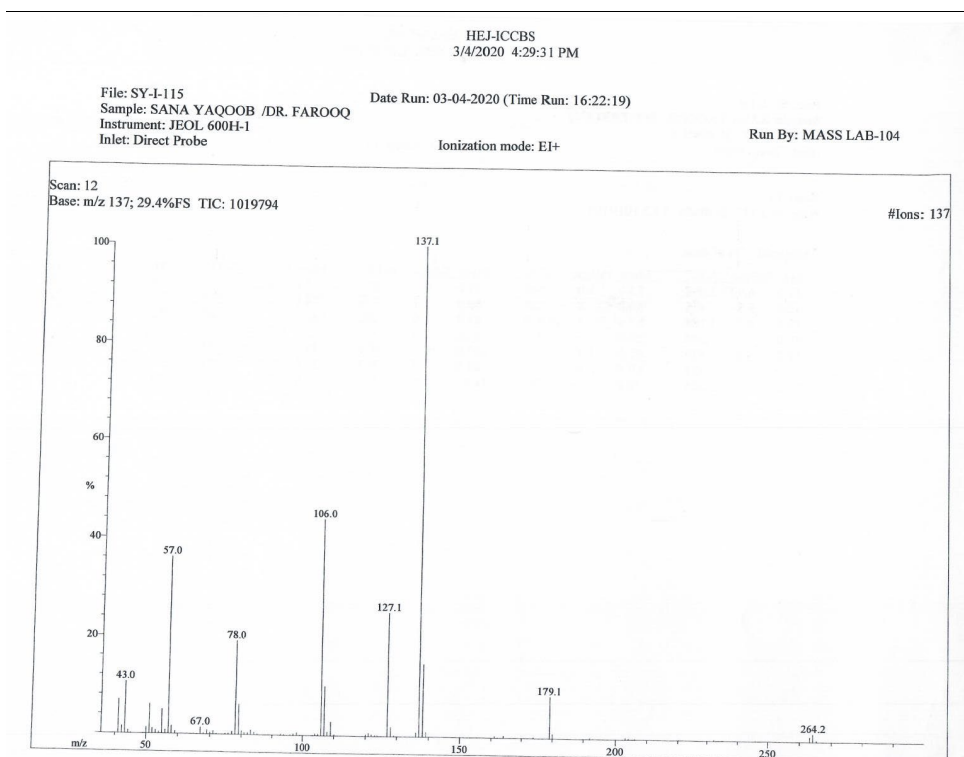

**Figure S16.** LR-MS (EI) spectrum of *N'*-Octanoylpyridine-3-carbohydrazide (**6**)

| File : D:\Data\sy-i-115-160320-e3.RAW                  |                    |                  |             |             |     |                                                             |
|--------------------------------------------------------|--------------------|------------------|-------------|-------------|-----|-------------------------------------------------------------|
| Full ms [ 49.500 - 700.500 ] - Range: 67.000 - 700.500 |                    |                  |             |             |     |                                                             |
| Scan No. 1 of 1                                        |                    |                  |             |             |     |                                                             |
| Mass                                                   | Relative Intensity | Theoretical Mass | Delta [ppm] | Delta [mmu] | RDB | Composition                                                 |
| 67.0558                                                | 2.1                | 67.0548          | 10.0        | 1.1         | 2.5 | C <sub>8</sub> H <sub>8</sub>                               |
| 69.0705                                                | 1.5                | 69.0704          | 1.1         | 0.1         | 1.5 | C <sub>8</sub> H <sub>8</sub>                               |
| 71.0866                                                | 0.7                | 71.0861          | 7.3         | 0.5         | 0.5 | C <sub>8</sub> H <sub>11</sub> N <sub>1</sub>               |
| 76.0185                                                | 1.0                | 76.0187          | -2.8        | -0.2        | 5.5 | C <sub>8</sub> H <sub>8</sub> N <sub>1</sub>                |
| 77.0264                                                | 2.8                | 77.0265          | -1.3        | -0.2        | 5.0 | C <sub>8</sub> H <sub>8</sub> N <sub>1</sub>                |
| 78.0347                                                | 24.8               | 78.0344          | 4.5         | 0.4         | 4.5 | C <sub>8</sub> H <sub>8</sub> N <sub>1</sub>                |
| 79.0416                                                | 6.4                | 79.0422          | -7.1        | -0.6        | 4.0 | C <sub>8</sub> H <sub>8</sub> N <sub>1</sub>                |
| 80.0486                                                | 0.9                | 80.0500          | -18.0       | -1.4        | 3.5 | C <sub>8</sub> H <sub>8</sub> N <sub>1</sub>                |
| 81.0702                                                | 0.6                | 81.0704          | -3.0        | -0.2        | 2.5 | C <sub>8</sub> H <sub>8</sub>                               |
| 82.0669                                                | 1.8                | 82.0657          | 15.1        | 1.2         | 2.5 | C <sub>8</sub> H <sub>8</sub> N <sub>1</sub>                |
| 83.0504                                                | 0.6                | 83.0497          | 8.8         | 0.7         | 2.5 | C <sub>8</sub> H <sub>8</sub> O <sub>1</sub>                |
|                                                        |                    | 83.0483          | 25.0        | 2.1         | 3.0 | C <sub>8</sub> H <sub>8</sub> N <sub>1</sub>                |
| 83.0834                                                | 1.2                |                  |             |             |     |                                                             |
| 84.0571                                                | 0.8                | 84.0575          | -5.1        | -0.4        | 2.0 | C <sub>8</sub> H <sub>8</sub> O <sub>1</sub>                |
|                                                        |                    | 84.0562          | 10.9        | 0.9         | 2.5 | C <sub>8</sub> H <sub>8</sub> N <sub>1</sub>                |
| 91.0422                                                | 0.7                | 91.0422          | -0.0        | -0.0        | 5.0 | C <sub>8</sub> H <sub>8</sub> N <sub>1</sub>                |
|                                                        |                    | 91.0395          | 29.4        | 2.7         | 0.5 | C <sub>8</sub> H <sub>8</sub> O <sub>1</sub>                |
| 92.0383                                                | 0.5                | 92.0374          | 9.1         | 0.8         | 5.0 | C <sub>8</sub> H <sub>8</sub> N <sub>1</sub>                |
| 96.0812                                                | 1.0                | 96.0813          | -1.6        | -0.2        | 2.5 | C <sub>8</sub> H <sub>8</sub> N <sub>1</sub>                |
| 97.0896                                                | 0.7                | 97.0891          | 4.9         | 0.5         | 2.0 | C <sub>8</sub> H <sub>8</sub> N <sub>1</sub>                |
| 98.0715                                                | 0.9                | 98.0718          | -2.8        | -0.3        | 2.5 | C <sub>8</sub> H <sub>8</sub> N <sub>1</sub>                |
|                                                        |                    | 98.0732          | -16.5       | -1.6        | 2.0 | C <sub>8</sub> H <sub>8</sub> O <sub>1</sub>                |
| 104.0378                                               | 4.5                | 104.0374         | 3.2         | 0.3         | 6.0 | C <sub>8</sub> H <sub>8</sub> N <sub>1</sub>                |
|                                                        |                    | 104.0348         | 29.0        | 3.0         | 1.5 | C <sub>8</sub> H <sub>8</sub> O <sub>1</sub> N <sub>1</sub> |
| 105.0438                                               | 1.0                | 105.0426         | 11.9        | 1.3         | 1.0 | C <sub>8</sub> H <sub>8</sub> O <sub>1</sub> N <sub>1</sub> |
|                                                        |                    | 105.0453         | -13.6       | -1.4        | 5.5 | C <sub>8</sub> H <sub>8</sub> N <sub>1</sub>                |
| 106.0283                                               | 46.1               | 106.0293         | -9.7        | -1.0        | 5.5 | C <sub>8</sub> H <sub>8</sub> O <sub>1</sub> N <sub>1</sub> |
|                                                        |                    | 106.0266         | 15.6        | 1.7         | 1.0 | C <sub>8</sub> H <sub>8</sub> O <sub>1</sub>                |
|                                                        |                    | 106.0233         | 28.3        | 3.0         | 1.5 | C <sub>8</sub> H <sub>8</sub> O <sub>1</sub> N <sub>1</sub> |
| 107.0356                                               | 9.3                | 107.0344         | 11.2        | 1.2         | 0.5 | C <sub>8</sub> H <sub>8</sub> O <sub>1</sub>                |
|                                                        |                    | 107.0371         | -13.8       | -1.5        | 5.0 | C <sub>8</sub> H <sub>8</sub> O <sub>1</sub> N <sub>1</sub> |
|                                                        |                    | 107.0331         | 23.8        | 2.5         | 1.0 | C <sub>8</sub> H <sub>8</sub> O <sub>1</sub> N <sub>1</sub> |
| 108.0399                                               | 0.8                | 108.0409         | -9.0        | -1.0        | 0.5 | C <sub>8</sub> H <sub>8</sub> O <sub>1</sub> N <sub>1</sub> |
|                                                        |                    | 108.0423         | -21.5       | -2.3        | 0.0 | C <sub>8</sub> H <sub>8</sub> O <sub>1</sub>                |
| 109.1009                                               | 2.8                | 109.1017         | -7.3        | -0.8        | 2.5 | C <sub>8</sub> H <sub>8</sub> N <sub>1</sub>                |
| 119.0479                                               | 2.1                | 119.0483         | -3.6        | -0.4        | 6.0 | C <sub>8</sub> H <sub>8</sub> N <sub>1</sub>                |
|                                                        |                    | 119.0497         | -14.9       | -1.8        | 5.5 | C <sub>8</sub> H <sub>8</sub> O <sub>1</sub>                |
|                                                        |                    | 119.0457         | 16.9        | 2.2         | 1.5 | C <sub>8</sub> H <sub>8</sub> O <sub>1</sub> N <sub>1</sub> |
| 120.0546                                               | 1.5                | 120.0535         | 8.9         | 1.1         | 1.0 | C <sub>8</sub> H <sub>8</sub> O <sub>1</sub> N <sub>1</sub> |
|                                                        |                    | 120.0562         | -13.4       | -1.6        | 5.5 | C <sub>8</sub> H <sub>8</sub> N <sub>1</sub>                |
|                                                        |                    | 120.0575         | -24.6       | -3.0        | 5.0 | C <sub>8</sub> H <sub>8</sub> O <sub>1</sub>                |
| 121.0405                                               | 0.8                | 121.0402         | 2.9         | 0.4         | 5.5 | C <sub>8</sub> H <sub>8</sub> O <sub>1</sub> N <sub>1</sub> |
|                                                        |                    | 121.0375         | 25.1        | 3.0         | 1.0 | C <sub>8</sub> H <sub>8</sub> O <sub>1</sub> N <sub>1</sub> |
| 122.0476                                               | 1.0                | 122.0480         | -3.0        | -0.4        | 5.0 | C <sub>8</sub> H <sub>8</sub> O <sub>1</sub> N <sub>1</sub> |
|                                                        |                    | 122.0453         | 18.9        | 2.3         | 0.5 | C <sub>8</sub> H <sub>8</sub> O <sub>1</sub> N <sub>1</sub> |
| 123.0522                                               | 0.8                | 123.0532         | -9.2        | -1.0        | 0.0 | C <sub>8</sub> H <sub>8</sub> O <sub>1</sub> N <sub>1</sub> |
|                                                        |                    | 123.0558         | -30.0       | -3.7        | 4.5 | C <sub>8</sub> H <sub>8</sub> O <sub>1</sub> N <sub>1</sub> |
| 127.1132                                               | 20.2               | 127.1123         | 6.8         | 0.9         | 1.5 | C <sub>8</sub> H <sub>8</sub> O <sub>1</sub>                |
|                                                        |                    | 127.1109         | 17.3        | 2.2         | 2.0 | C <sub>8</sub> H <sub>8</sub> N <sub>1</sub>                |
| 128.1153                                               | 1.7                | 128.1198         | -26.8       | -3.4        | 1.5 | C <sub>8</sub> H <sub>8</sub> N <sub>1</sub>                |
| 136.0516                                               | 0.7                | 136.0511         | 4.0         | 0.6         | 5.5 | C <sub>8</sub> H <sub>8</sub> O <sub>1</sub> N <sub>1</sub> |
|                                                        |                    | 136.0524         | -5.8        | -0.8        | 5.0 | C <sub>8</sub> H <sub>8</sub> O <sub>1</sub>                |
|                                                        |                    | 136.0484         | 23.7        | 3.2         | 1.0 | C <sub>8</sub> H <sub>8</sub> O <sub>1</sub> N <sub>1</sub> |
| 137.0585                                               | 100.0              | 137.0589         | -2.7        | -0.4        | 5.0 | C <sub>8</sub> H <sub>8</sub> O <sub>1</sub> N <sub>1</sub> |
|                                                        |                    | 137.0603         | -12.5       | -1.7        | 4.5 | C <sub>8</sub> H <sub>8</sub> O <sub>1</sub>                |
|                                                        |                    | 137.0562         | 16.9        | 2.3         | 0.5 | C <sub>8</sub> H <sub>8</sub> O <sub>1</sub> N <sub>1</sub> |
| 138.0644                                               | 12.0               | 138.0641         | 2.6         | 0.4         | 0.0 | C <sub>8</sub> H <sub>8</sub> O <sub>1</sub>                |
|                                                        |                    | 138.0667         | -16.9       | -2.3        | 4.5 | C <sub>8</sub> H <sub>8</sub> O <sub>1</sub> N <sub>1</sub> |
|                                                        |                    | 138.0681         | -26.6       | -3.7        | 4.0 | C <sub>8</sub> H <sub>8</sub> O <sub>1</sub> N <sub>1</sub> |
| 139.0667                                               | 0.9                | 139.0633         | 25.4        | 3.4         | 4.0 | C <sub>8</sub> H <sub>8</sub> O <sub>1</sub> N <sub>1</sub> |
| 161.0591                                               | 13.5               | 161.0588         | 1.3         | 0.2         | 7.0 | C <sub>8</sub> H <sub>8</sub> O <sub>1</sub> N <sub>1</sub> |
|                                                        |                    | 161.0603         | -7.0        | -1.1        | 6.5 | C <sub>8</sub> H <sub>8</sub> O <sub>1</sub>                |
|                                                        |                    | 161.0562         | 18.0        | 2.9         | 2.0 | C <sub>8</sub> H <sub>8</sub> O <sub>1</sub> N <sub>1</sub> |
| 162.0620                                               | 1.5                | 162.0641         | -12.7       | -2.1        | 2.0 | C <sub>8</sub> H <sub>8</sub> O <sub>1</sub> N <sub>1</sub> |
|                                                        |                    | 162.0667         | -29.2       | -4.7        | 6.5 | C <sub>8</sub> H <sub>8</sub> O <sub>1</sub> N <sub>1</sub> |
| 174.0662                                               | 11.5               | 174.0667         | -3.4        | -0.6        | 7.5 | C <sub>8</sub> H <sub>8</sub> O <sub>1</sub> N <sub>1</sub> |
|                                                        |                    | 174.0681         | -11.1       | -1.9        | 7.0 | C <sub>11</sub> H <sub>15</sub> O <sub>2</sub>              |

  

| Mass     | Relative Intensity | Theoretical Mass | Delta [ppm] | Delta [mmu] | RDB  | Composition                                                   |
|----------|--------------------|------------------|-------------|-------------|------|---------------------------------------------------------------|
| 175.0725 | 2.6                | 174.0641         | 12.0        | 2.1         | 3.0  | C <sub>9</sub> H <sub>13</sub> O <sub>1</sub> N <sub>1</sub>  |
|          |                    | 175.0719         | 3.6         | 0.6         | 2.5  | C <sub>9</sub> H <sub>13</sub> O <sub>1</sub> N <sub>1</sub>  |
|          |                    | 175.0746         | -11.7       | -2.1        | 7.0  | C <sub>9</sub> H <sub>13</sub> O <sub>1</sub> N <sub>1</sub>  |
| 179.0698 | 6.2                | 175.0759         | -19.4       | -3.4        | 6.5  | C <sub>11</sub> H <sub>15</sub> O <sub>2</sub>                |
|          |                    | 179.0695         | 2.1         | 0.4         | 6.0  | C <sub>9</sub> H <sub>13</sub> O <sub>1</sub> N <sub>1</sub>  |
|          |                    | 179.0708         | -5.4        | -1.0        | 5.5  | C <sub>9</sub> H <sub>13</sub> O <sub>1</sub>                 |
|          |                    | 179.0668         | 17.0        | 3.1         | 1.5  | C <sub>9</sub> H <sub>13</sub> O <sub>1</sub> N <sub>1</sub>  |
|          |                    | 179.0735         | -20.4       | -3.7        | 10.0 | C <sub>13</sub> H <sub>17</sub> N <sub>1</sub>                |
| 180.0708 | 0.7                | 180.0687         | 11.6        | 2.1         | 10.0 | C <sub>13</sub> H <sub>17</sub> N <sub>1</sub>                |
|          |                    | 180.0746         | -21.0       | -3.8        | 1.0  | C <sub>9</sub> H <sub>13</sub> O <sub>1</sub> N <sub>1</sub>  |
|          |                    | 180.0661         | 26.5        | 4.8         | 5.5  | C <sub>9</sub> H <sub>13</sub> O <sub>1</sub> N <sub>1</sub>  |
| 188.0819 | 1.3                | 188.0824         | -2.6        | -0.5        | 7.5  | C <sub>10</sub> H <sub>14</sub> O <sub>1</sub> N <sub>1</sub> |
|          |                    | 188.0837         | -9.7        | -1.8        | 7.0  | C <sub>12</sub> H <sub>16</sub> O <sub>2</sub>                |
|          |                    | 188.0797         | 11.7        | 2.2         | 3.0  | C <sub>9</sub> H <sub>13</sub> O <sub>1</sub> N <sub>1</sub>  |
| 202.0978 | 2.9                | 202.0980         | -1.1        | -0.2        | 7.5  | C <sub>11</sub> H <sub>15</sub> O <sub>1</sub> N <sub>1</sub> |
|          |                    | 202.0994         | -7.7        | -1.6        | 7.0  | C <sub>13</sub> H <sub>17</sub> O <sub>2</sub>                |
|          |                    | 202.0954         | 12.2        | 2.5         | 3.0  | C <sub>9</sub> H <sub>13</sub> O <sub>1</sub> N <sub>1</sub>  |
| 203.1049 | 4.8                | 203.1059         | -5.0        | -1.0        | 7.0  | C <sub>11</sub> H <sub>15</sub> O <sub>1</sub> N <sub>1</sub> |
|          |                    | 203.1032         | 8.2         | 1.7         | 2.5  | C <sub>9</sub> H <sub>13</sub> O <sub>1</sub> N <sub>1</sub>  |
|          |                    | 203.1072         | -11.6       | -2.3        | 6.5  | C <sub>13</sub> H <sub>17</sub> O <sub>2</sub>                |
| 204.1101 | 0.8                | 204.1110         | -4.5        | -0.9        | 2.0  | C <sub>14</sub> H <sub>19</sub> O <sub>1</sub> N <sub>1</sub> |
|          |                    | 204.1137         | -17.6       | -3.6        | 6.5  | C <sub>14</sub> H <sub>19</sub> O <sub>1</sub> N <sub>1</sub> |
|          |                    | 204.1150         | -24.2       | -4.9        | 6.0  | C <sub>14</sub> H <sub>19</sub> O <sub>1</sub>                |
| 216.1145 | 4.3                | 216.1150         | -2.7        | -0.6        | 7.0  | C <sub>14</sub> H <sub>19</sub> O <sub>1</sub>                |
|          |                    | 216.1137         | 3.6         | 0.8         | 7.5  | C <sub>14</sub> H <sub>19</sub> O <sub>1</sub> N <sub>1</sub> |
|          |                    | 216.1110         | 16.0        | 3.4         | 3.0  | C <sub>9</sub> H <sub>13</sub> O <sub>1</sub> N <sub>1</sub>  |
| 217.1200 | 1.4                | 217.1188         | 5.4         | 1.2         | 2.5  | C <sub>9</sub> H <sub>13</sub> O <sub>1</sub> N <sub>1</sub>  |
|          |                    | 217.1215         | -6.9        | -1.5        | 7.0  | C <sub>14</sub> H <sub>19</sub> O <sub>1</sub> N <sub>1</sub> |
|          |                    | 217.1229         | -13.1       | -2.9        | 6.5  | C <sub>14</sub> H <sub>19</sub> O <sub>1</sub>                |
| 230.1306 | 0.6                | 230.1307         | -0.2        | -0.1        | 7.0  | C <sub>15</sub> H <sub>19</sub> O <sub>1</sub>                |
|          |                    | 230.1293         | 5.6         | 1.3         | 7.5  | C <sub>15</sub> H <sub>19</sub> O <sub>1</sub> N <sub>1</sub> |
|          |                    | 230.1267         | 17.2        | 4.0         | 3.0  | C <sub>15</sub> H <sub>19</sub> O <sub>1</sub> N <sub>1</sub> |
| 245.1537 | 0.8                | 245.1542         | -1.8        | -0.4        | 6.5  | C <sub>14</sub> H <sub>19</sub> O <sub>1</sub> N <sub>1</sub> |
|          |                    | 245.1528         | 3.7         | 0.9         | 7.0  | C <sub>14</sub> H <sub>19</sub> O <sub>1</sub> N <sub>1</sub> |
|          |                    | 245.1501         | 14.6        | 3.6         | 2.5  | C <sub>11</sub> H <sub>15</sub> O <sub>1</sub> N <sub>1</sub> |
| 263.1636 | 0.6                | 263.1634         | 0.9         | 0.2         | 6.0  | C <sub>18</sub> H <sub>21</sub> O <sub>1</sub> N <sub>1</sub> |
|          |                    | 263.1647         | -4.2        | -1.1        | 5.5  | C <sub>14</sub> H <sub>19</sub> O <sub>1</sub> N <sub>1</sub> |
|          |                    | 263.1607         | 11.1        | 2.9         | 1.5  | C <sub>13</sub> H <sub>17</sub> O <sub>1</sub> N <sub>1</sub> |
|          |                    | 263.1674         | -14.4       | -3.8        | 10.0 | C <sub>13</sub> H <sub>17</sub> O <sub>1</sub> N <sub>1</sub> |

Figure S17. HR-MS (EI) spectral data of N'-Octanoylpyridine-3-carbohydrazide (6)

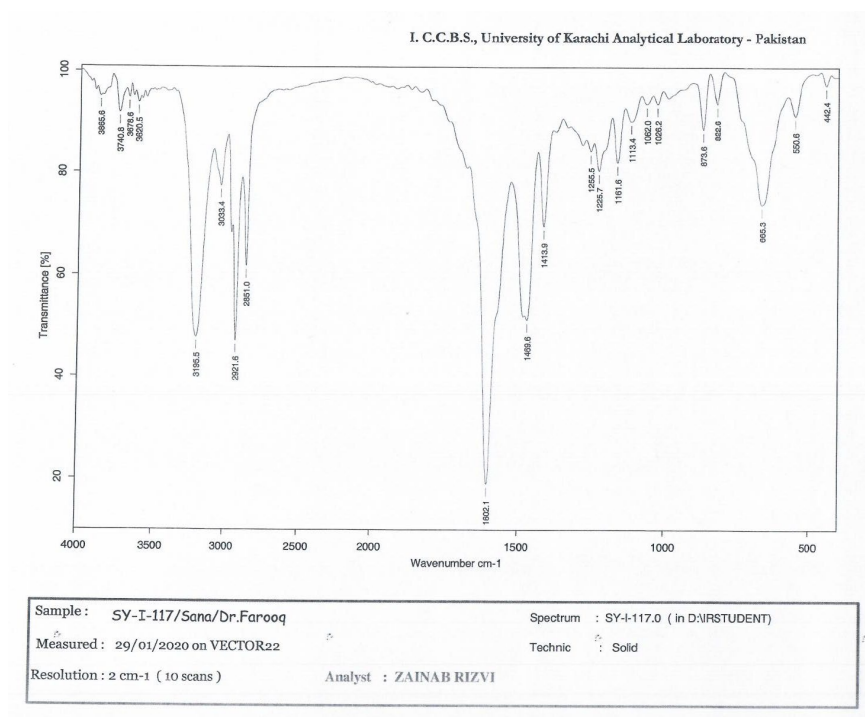

**Figure S18.** IR spectrum of *N'*-Decanoylpyridine-3-carbohydrazide (7)

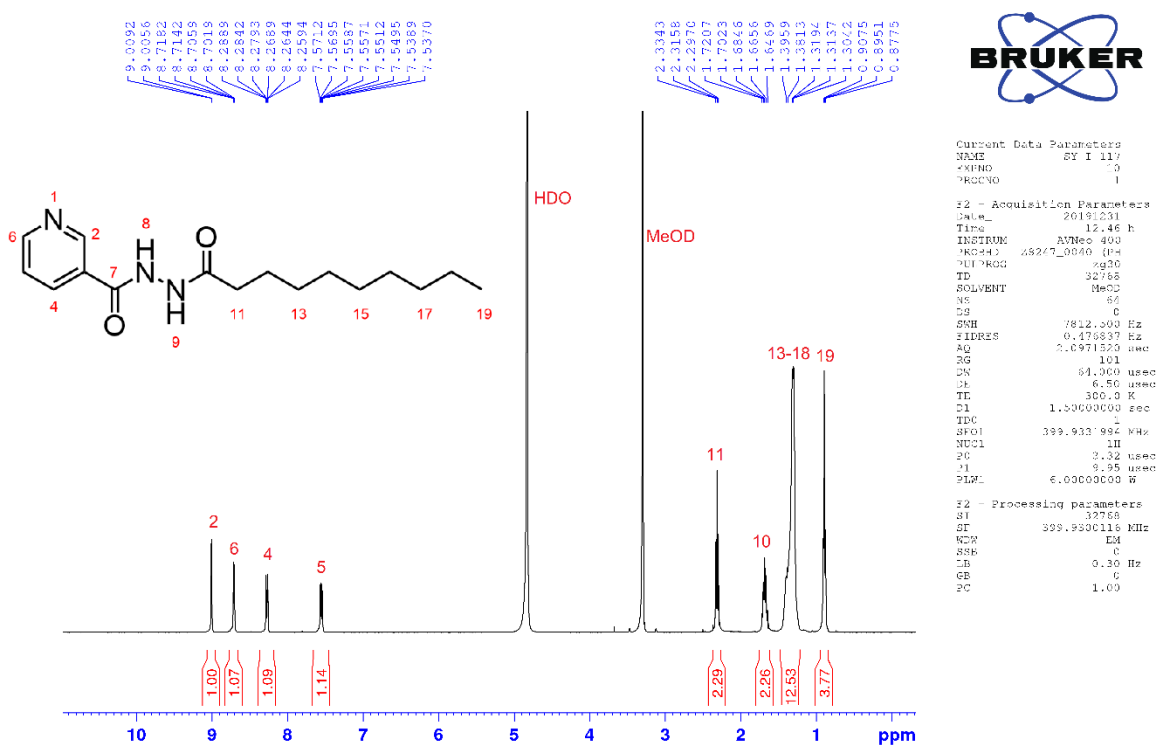

**Figure S19.** <sup>1</sup>H NMR spectrum of *N'*-Decanoylpyridine-3-carbohydrazide (7)

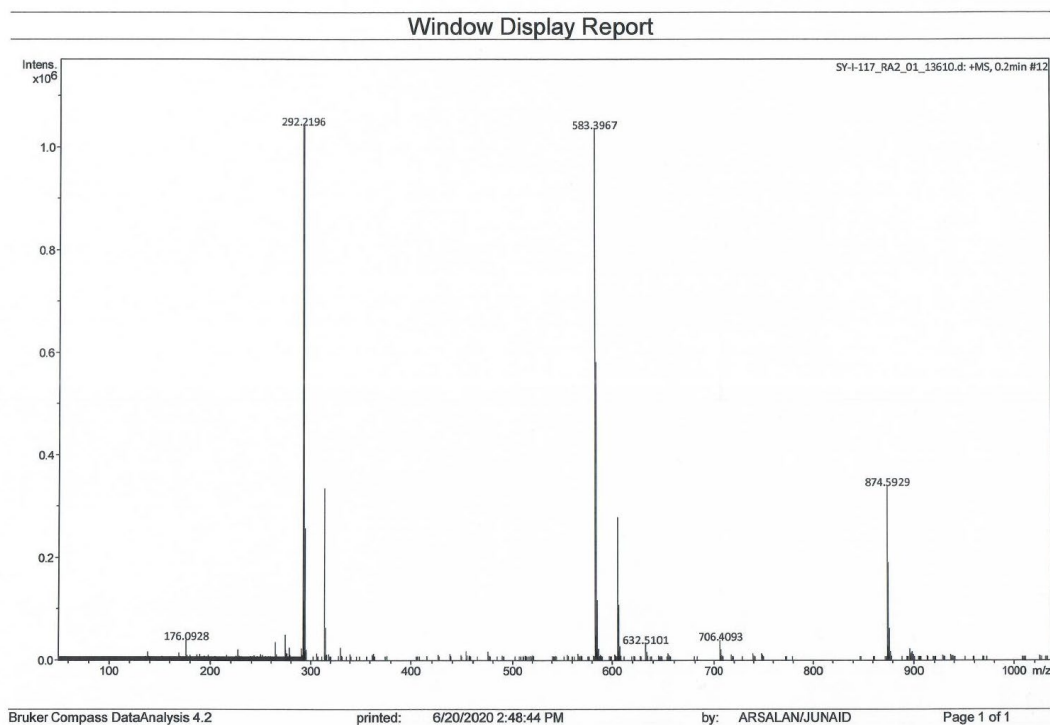

**Figure S20.** LR-MS (EI) spectrum of *N'*-Decanoylpyridine-3-carbohydrazide (**7**)

Lower formula:  Generate

Upper formula: C<sub>16</sub> Help

C 0-16

Note: for m < 2000 the elements C, H, N, and O are considered implicitly.

Adducts, pos. M+H ☐ Collect adducts

Adducts, neg. M-H ☐

Measured m/z 292.2021 Tolerance: 10 ppm Charge: 1

| Meas. m/z | # | Ion Formula                                                   | m/z      | err [ppm] | mSigma | #mSigma | Score  | rdb | e <sup>-</sup> | Conf | N-Rule |
|-----------|---|---------------------------------------------------------------|----------|-----------|--------|---------|--------|-----|----------------|------|--------|
| 292.2021  | 1 | C <sub>16</sub> H <sub>26</sub> N <sub>3</sub> O <sub>2</sub> | 292.2020 | -0.6      | 66.3   | 1       | 100.00 | 5.5 | even           | ok   |        |
| 292.2021  | 2 | C <sub>12</sub> H <sub>22</sub> N <sub>9</sub>                | 292.1993 | -9.8      | 79.7   | 2       | 9.77   | 6.5 | even           | ok   |        |

☐ Automatically locate monoisotopic peak Maximum number of formulae 500

☒ Check rings plus double bonds Minimum -0.5 Maximum 40

Electron configuration even

☒ Filter H/C element ratio Minimum H/C: 0 Maximum H/C: 3

☒ Estimate carbon number ☒ Generate immediately

Copy to SmartFormula Parameters Show Pattern

**Figure S21.** HR-MS (EI) spectral data of *N'*-Decanoylpyridine-3-carbohydrazide (**7**)



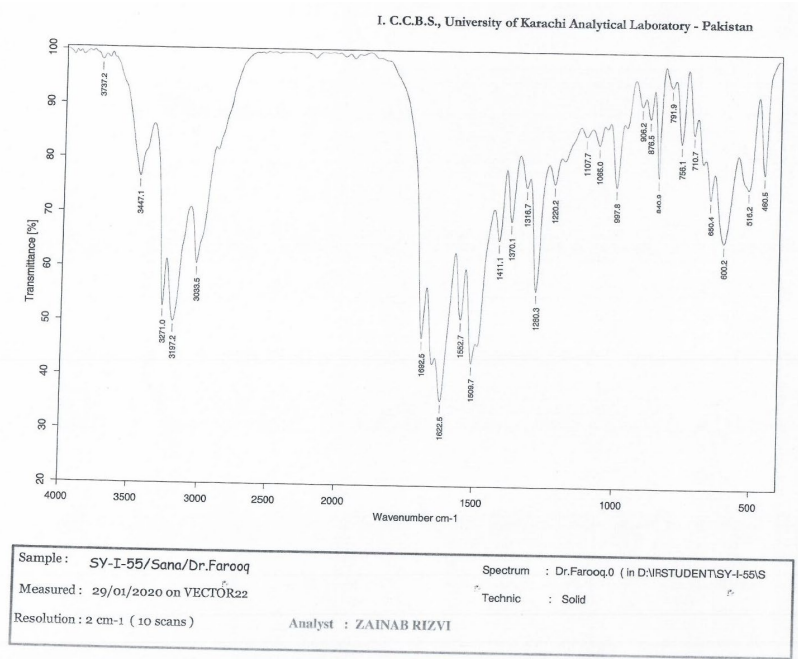

Figure S22. IR spectrum of *N'*-Acetylpyridine-4-carbohydrazide (8)

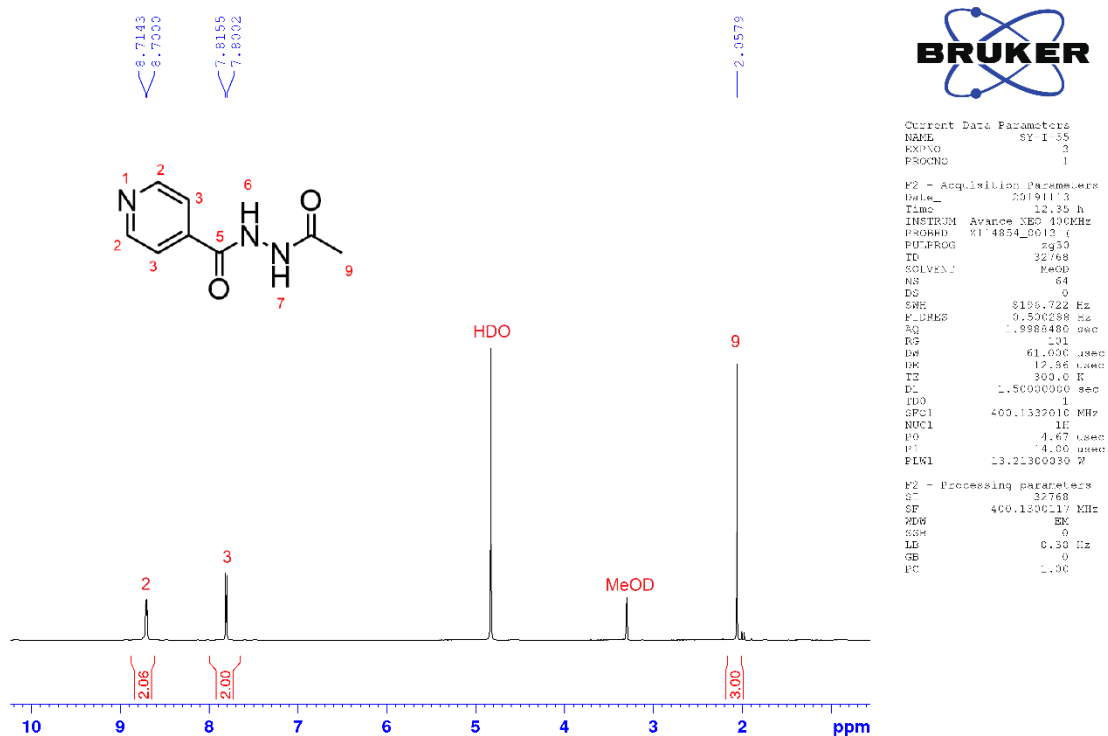

Figure S23. <sup>1</sup>H NMR spectrum of *N'*-Acetylpyridine-4-carbohydrazide (8)

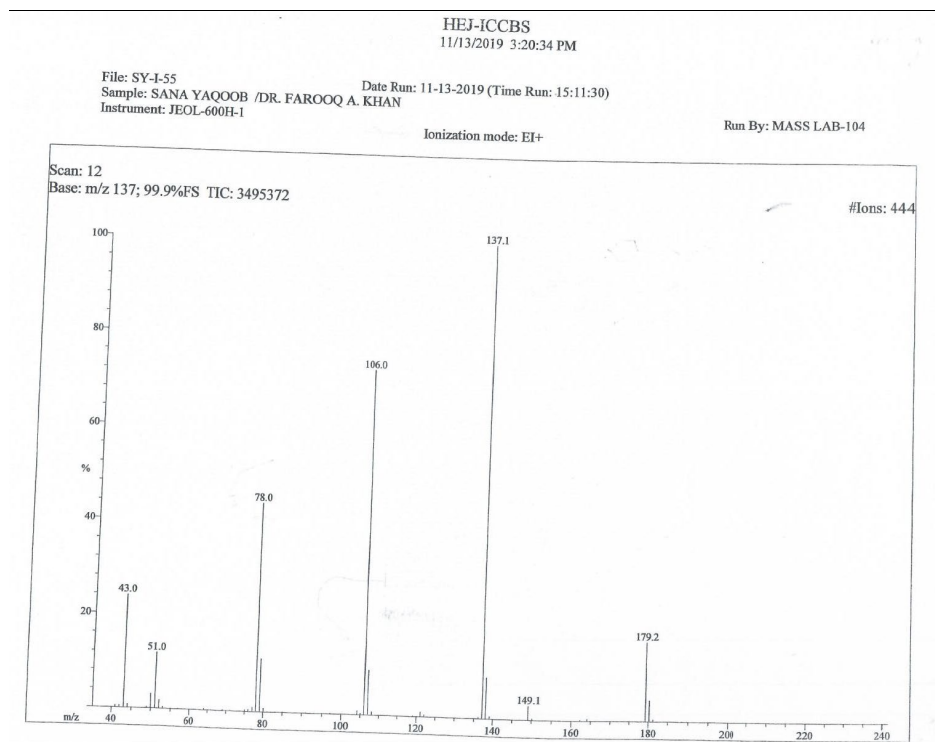

Figure S24. LR-MS (EI) spectrum of *N'*-Acetylpyridine-4-carbohydrazide (8)

File : D:\Data\sy-i-55-140220-es.RAW  
Full ms [ 49.500 - 750.500 ] - Range: 62.000 - 750.500  
Scan No. 1 of 1

| Mass     | Relative Intensity | Theoretical Mass | Delta [ppm] | Delta [amu] | RDB | Composition                                                 |
|----------|--------------------|------------------|-------------|-------------|-----|-------------------------------------------------------------|
| 62.0255  | 2.5                | 62.0242          | 21.4        | 1.3         | 0.5 | C <sub>8</sub> H <sub>8</sub> O <sub>3</sub> N <sub>2</sub> |
| 63.0314  | 4.2                | 63.0320          | -9.2        | -0.6        | 0.0 | C <sub>8</sub> H <sub>8</sub> O <sub>3</sub> N <sub>2</sub> |
| 64.0364  | 5.8                |                  |             |             |     |                                                             |
| 65.0337  | 2.0                |                  |             |             |     |                                                             |
| 76.0163  | 4.6                | 76.0160          | 3.2         | 0.2         | 1.0 | C <sub>8</sub> H <sub>8</sub> O <sub>3</sub>                |
| 77.0241  | 10.6               | 76.0147          | 20.9        | 1.6         | 1.5 | C <sub>8</sub> H <sub>8</sub> O <sub>3</sub> N <sub>2</sub> |
|          |                    | 77.0239          | 2.6         | 0.2         | 0.5 | C <sub>8</sub> H <sub>8</sub> O <sub>3</sub>                |
| 78.0322  | 73.5               | 77.0225          | 20.0        | 1.5         | 1.0 | C <sub>8</sub> H <sub>8</sub> O <sub>3</sub> N <sub>2</sub> |
|          |                    | 78.0317          | 5.9         | 0.5         | 0.0 | C <sub>8</sub> H <sub>8</sub> O <sub>3</sub>                |
|          |                    | 78.0304          | 23.1        | 1.8         | 0.5 | C <sub>8</sub> H <sub>8</sub> O <sub>3</sub> N <sub>2</sub> |
| 79.0391  | 11.6               | 79.0382          | 11.6        | 0.9         | 0.0 | C <sub>8</sub> H <sub>8</sub> O <sub>3</sub> N <sub>2</sub> |
| 91.0410  | 21.3               | 91.0395          | 16.4        | 1.5         | 0.5 | C <sub>8</sub> H <sub>8</sub> O <sub>3</sub>                |
| 92.0424  | 2.4                |                  |             |             |     |                                                             |
| 104.0418 | 22.4               |                  |             |             |     |                                                             |
| 105.0292 | 3.3                | 105.0300         | -7.9        | -0.8        | 1.5 | C <sub>8</sub> H <sub>8</sub> O <sub>3</sub> N <sub>2</sub> |
| 105.0573 | 7.9                | 105.0552         | 20.2        | 2.1         | 0.5 | C <sub>8</sub> H <sub>8</sub> O <sub>3</sub>                |
| 106.0283 | 73.6               | 106.0266         | 16.2        | 1.7         | 1.0 | C <sub>8</sub> H <sub>8</sub> O <sub>3</sub> N <sub>2</sub> |
|          |                    | 106.0253         | 28.9        | 3.1         | 1.5 | C <sub>8</sub> H <sub>8</sub> O <sub>3</sub> N <sub>2</sub> |
| 107.0328 | 6.7                | 107.0331         | -2.9        | -0.3        | 1.0 | C <sub>8</sub> H <sub>8</sub> O <sub>3</sub> N <sub>2</sub> |
|          |                    | 107.0344         | -15.5       | -1.7        | 0.5 | C <sub>8</sub> H <sub>8</sub> O <sub>3</sub>                |
| 119.0472 | 7.5                | 119.0457         | 13.3        | 1.6         | 1.5 | C <sub>8</sub> H <sub>8</sub> O <sub>3</sub> N <sub>2</sub> |
| 120.0359 | 1.6                |                  |             |             |     |                                                             |
| 122.0480 | 2.5                | 122.0453         | 22.2        | 2.7         | 0.5 | C <sub>8</sub> H <sub>8</sub> O <sub>3</sub> N <sub>2</sub> |
| 123.0313 | 14.8               | 123.0320         | -5.8        | -0.7        | 5.0 | C <sub>8</sub> H <sub>8</sub> O <sub>3</sub> N <sub>2</sub> |
|          |                    | 123.0280         | 26.9        | 3.3         | 1.0 | C <sub>8</sub> H <sub>8</sub> O <sub>3</sub> N <sub>2</sub> |
| 124.0350 | 1.1                | 124.0358         | -6.6        | -0.8        | 0.5 | C <sub>8</sub> H <sub>8</sub> O <sub>3</sub> N <sub>2</sub> |
| 132.0460 | 2.4                | 132.0423         | 28.3        | 3.7         | 2.0 | C <sub>8</sub> H <sub>8</sub> O <sub>3</sub>                |
| 137.0588 | 49.2               | 137.0603         | -10.3       | -1.4        | 4.5 | C <sub>8</sub> H <sub>8</sub> O <sub>3</sub>                |
|          |                    | 137.0562         | 19.0        | 2.6         | 0.5 | C <sub>8</sub> H <sub>8</sub> O <sub>3</sub> N <sub>2</sub> |
| 138.0610 | 3.7                | 138.0641         | -22.1       | -3.0        | 0.0 | C <sub>8</sub> H <sub>8</sub> O <sub>3</sub> N <sub>2</sub> |
| 149.0474 | 1.6                | 149.0477         | -1.8        | -0.3        | 6.0 | C <sub>8</sub> H <sub>8</sub> O <sub>3</sub> N <sub>2</sub> |
|          |                    | 149.0437         | 25.2        | 3.8         | 2.0 | C <sub>8</sub> H <sub>8</sub> O <sub>3</sub> N <sub>2</sub> |
| 161.0578 | 100.0              | 161.0562         | 10.0        | 1.6         | 2.5 | C <sub>8</sub> H <sub>8</sub> O <sub>3</sub> N <sub>2</sub> |
|          |                    | 161.0603         | -15.0       | -2.4        | 6.5 | C <sub>8</sub> H <sub>8</sub> O <sub>3</sub> N <sub>2</sub> |
| 162.0611 | 8.7                | 162.0641         | -18.1       | -2.9        | 2.0 | C <sub>8</sub> H <sub>8</sub> O <sub>3</sub> N <sub>2</sub> |
| 163.0426 | 1.5                | 163.0395         | 19.2        | 3.1         | 6.5 | C <sub>8</sub> H <sub>8</sub> O <sub>3</sub> N <sub>2</sub> |
|          |                    | 163.0382         | 27.4        | 4.5         | 7.0 | C <sub>8</sub> H <sub>8</sub> O <sub>3</sub> N <sub>2</sub> |
| 179.0696 | 5.2                | 179.0695         | 0.9         | 0.2         | 6.0 | C <sub>8</sub> H <sub>8</sub> O <sub>3</sub> N <sub>2</sub> |
|          |                    | 179.0708         | -6.6        | -1.2        | 5.5 | C <sub>8</sub> H <sub>8</sub> O <sub>3</sub> N <sub>2</sub> |

Figure S25. HR-MS (EI) spectral data of *N'*-Acetylpyridine-4-carbohydrazide (8)

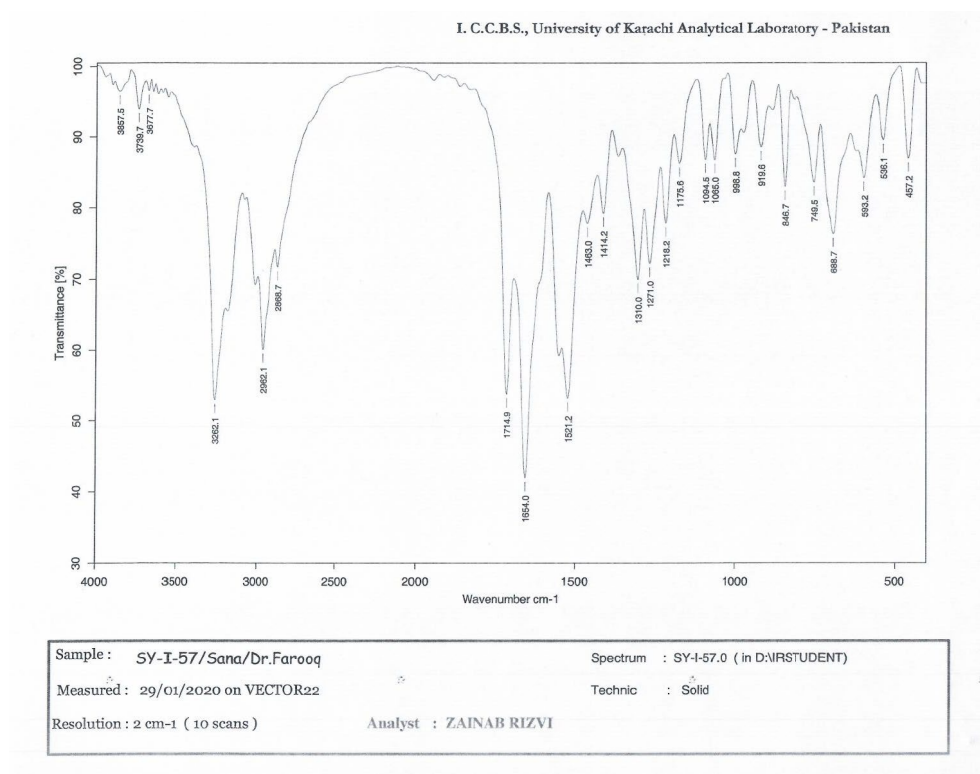

**Figure S26.** IR spectrum of *N'*-Butyrylpyridine-4-carbohydrazide (**9**)

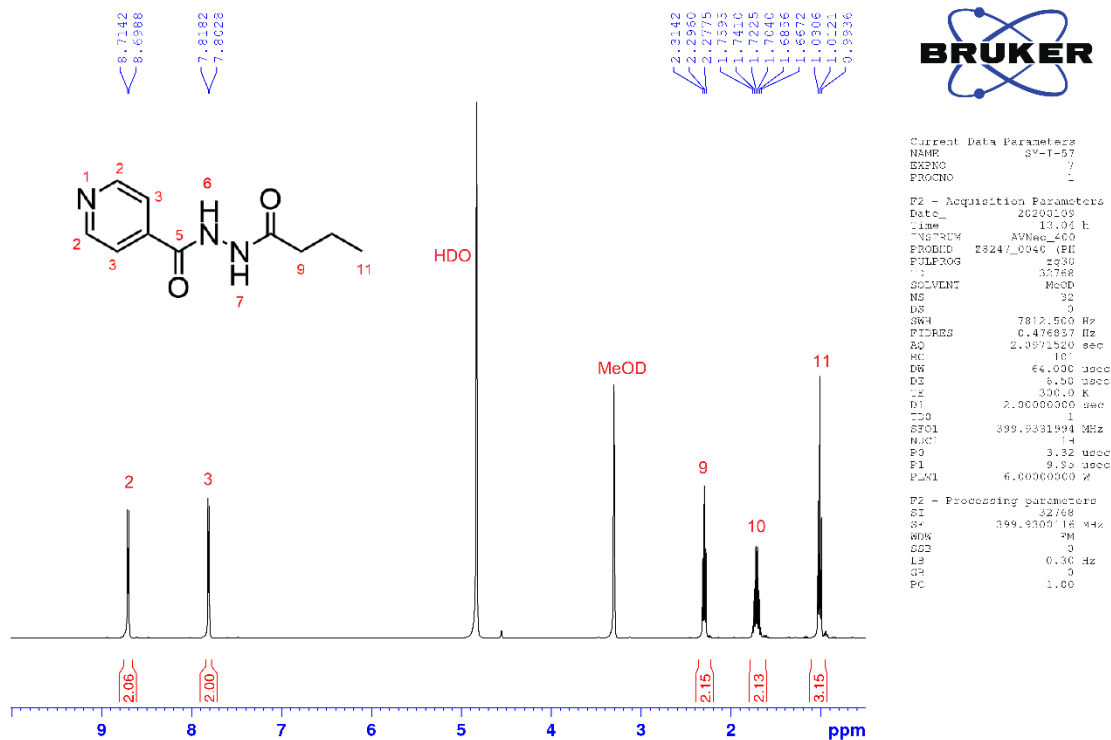

Figure S27.  $^1\text{H}$  NMR spectrum of *N'*-Butyrylpyridine-4-carbohydrazide (9)

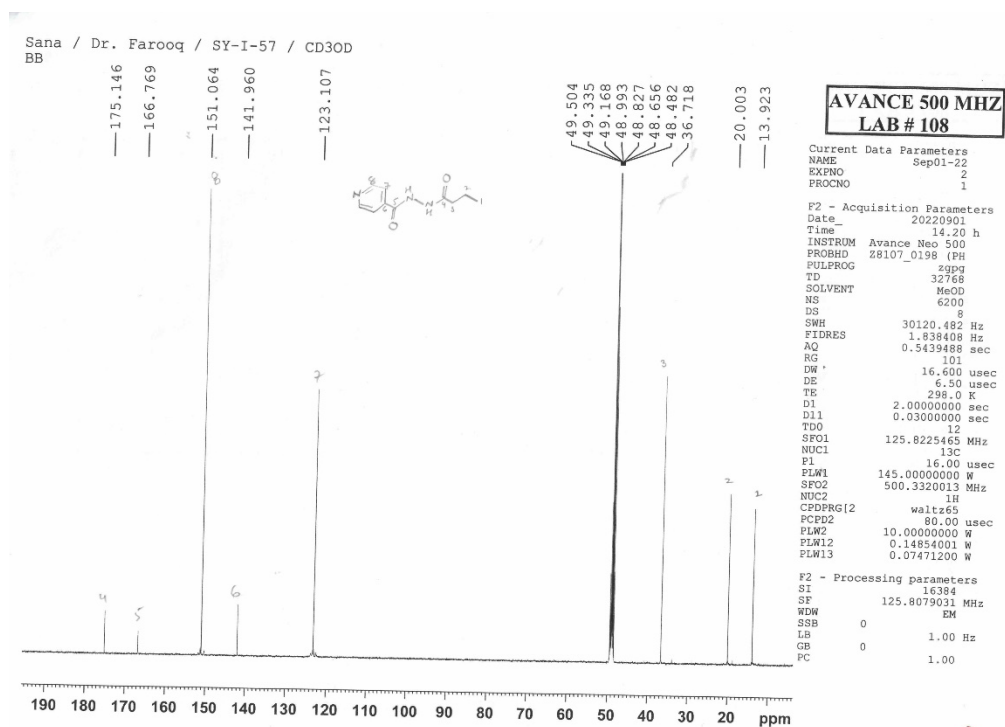

**Figure S28.**  $^{13}\text{C}$  NMR spectrum of *N*-Butyrylpyridine-4-carbohydrazide (**9**)

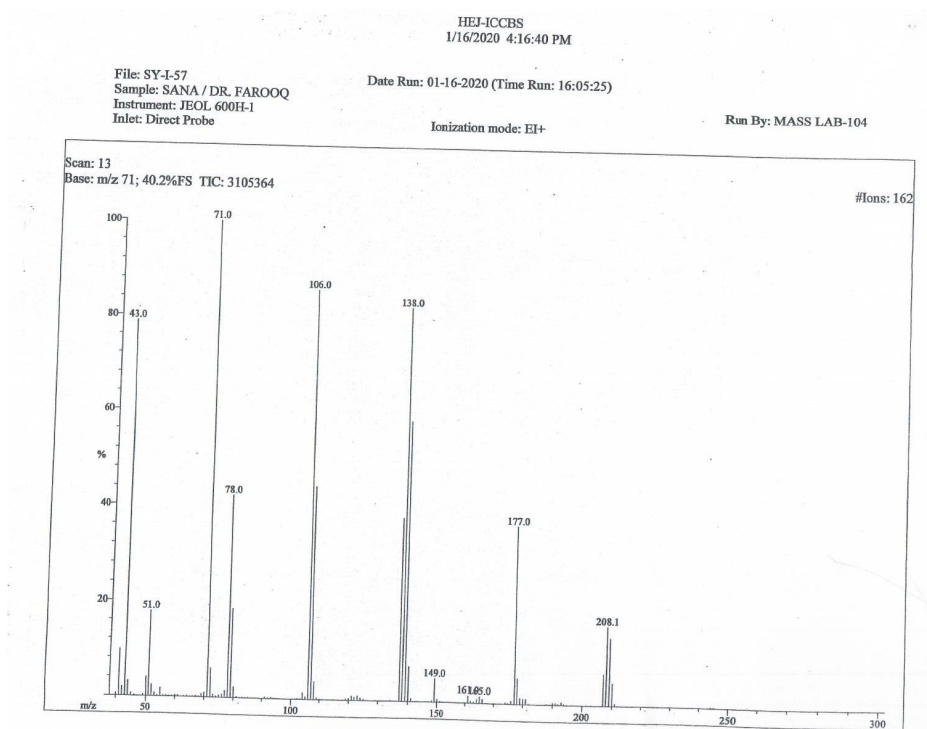

**Figure S29.** LR-MS (EI) spectrum of *N*-Butyrylpyridine-4-carbohydrazide (**9**)

File : D:\Data\sy-i-57-140220-c3.RAW  
Full ms [ 49.500 - 750.500 ] - Range: 72.000 - 750.500  
Scan No. 1 of 1

| Mass     | Relative Intensity | Theoretical Mass | Delta [ppm] | Delta [amu] | RDB | Composition                                                 |
|----------|--------------------|------------------|-------------|-------------|-----|-------------------------------------------------------------|
| 72.9906  | 3.2                | 72.9926          | -26.8       | -2.0        | 2.5 | C <sub>2</sub> H <sub>2</sub> O <sub>3</sub>                |
| 74.9736  | 1.0                |                  |             |             |     |                                                             |
| 75.9803  | 2.4                | 75.9797          | 9.0         | 0.7         | 2.0 | C <sub>2</sub> O <sub>4</sub>                               |
| 76.9892  | 6.3                | 76.9875          | 22.4        | 1.7         | 1.5 | C <sub>2</sub> H <sub>2</sub> O <sub>4</sub>                |
| 77.9978  | 26.0               |                  |             |             |     |                                                             |
| 83.0167  | 1.6                |                  |             |             |     |                                                             |
| 91.0136  | 7.2                |                  |             |             |     |                                                             |
| 92.0141  | 1.2                | 91.0144          | -8.8        | -0.8        | 1.5 | C <sub>2</sub> H <sub>3</sub> O <sub>3</sub> N <sub>2</sub> |
| 105.0125 | 2.2                |                  |             |             |     |                                                             |
| 106.9949 | 4.7                | 106.9967         | -17.3       | -1.8        | 2.0 | H <sub>2</sub> O <sub>4</sub> N <sub>2</sub>                |
| 118.0591 | 1.1                | 118.0617         | -21.4       | -2.5        | 1.5 | C <sub>2</sub> H <sub>4</sub> O <sub>4</sub> N <sub>2</sub> |
| 119.0471 | 6.7                | 119.0457         | 11.8        | 1.4         | 1.5 | C <sub>2</sub> H <sub>4</sub> O <sub>4</sub> N <sub>2</sub> |
| 120.0542 | 1.4                | 120.0535         | 6.2         | 0.7         | 1.0 | C <sub>2</sub> H <sub>4</sub> O <sub>4</sub> N <sub>2</sub> |
| 122.0532 | 1.5                | 122.0566         | -27.3       | -3.3        | 0.5 | C <sub>2</sub> H <sub>4</sub> O <sub>4</sub> N <sub>2</sub> |
| 123.0392 | 3.9                | 123.0406         | -11.3       | -1.4        | 0.5 | C <sub>2</sub> H <sub>4</sub> O <sub>4</sub> N <sub>2</sub> |
| 137.0590 | 8.2                | 137.0603         | -9.1        | -1.3        | 4.5 | C <sub>2</sub> H <sub>4</sub> O <sub>4</sub> N <sub>2</sub> |
| 138.0622 | 1.2                | 138.0641         | -20.2       | -2.8        | 0.5 | C <sub>2</sub> H <sub>4</sub> O <sub>4</sub> N <sub>2</sub> |
| 161.0589 | 100.0              | 161.0603         | -8.6        | -1.4        | 0.0 | C <sub>2</sub> H <sub>4</sub> O <sub>4</sub> N <sub>2</sub> |
| 162.0603 | 9.2                | 161.0562         | 16.4        | 2.6         | 6.5 | C <sub>2</sub> H <sub>4</sub> O <sub>4</sub> N <sub>2</sub> |
|          |                    | 162.0641         | -22.9       | -3.7        | 2.0 | C <sub>2</sub> H <sub>4</sub> O <sub>4</sub> N <sub>2</sub> |
|          |                    | 162.0555         | 29.9        | 4.8         | 6.5 | C <sub>2</sub> H <sub>4</sub> O <sub>4</sub> N <sub>2</sub> |
| 174.0672 | 8.6                | 174.0681         | -5.1        | -0.9        | 7.0 | C <sub>2</sub> H <sub>4</sub> O <sub>4</sub> N <sub>2</sub> |
|          |                    | 174.0641         | 18.0        | 3.1         | 3.0 | C <sub>2</sub> H <sub>4</sub> O <sub>4</sub> N <sub>2</sub> |
| 175.0696 | 1.1                | 175.0719         | -13.2       | -2.3        | 6.0 | C <sub>2</sub> H <sub>4</sub> O <sub>4</sub> N <sub>2</sub> |
| 177.0784 | 1.9                | 177.0790         | -3.5        | -0.6        | 2.5 | C <sub>2</sub> H <sub>4</sub> O <sub>4</sub> N <sub>2</sub> |
|          |                    | 177.0750         | 19.2        | 3.4         | 2.0 | C <sub>2</sub> H <sub>4</sub> O <sub>4</sub> N <sub>2</sub> |
| 187.0748 | 2.0                | 187.0739         | -6.1        | -1.1        | 7.5 | C <sub>2</sub> H <sub>4</sub> O <sub>4</sub> N <sub>2</sub> |
|          |                    | 187.0719         | 15.4        | 2.9         | 3.5 | C <sub>2</sub> H <sub>4</sub> O <sub>4</sub> N <sub>2</sub> |
| 188.0820 | 2.0                | 188.0837         | -9.4        | -1.8        | 7.0 | C <sub>2</sub> H <sub>4</sub> O <sub>4</sub> N <sub>2</sub> |
|          |                    | 188.0797         | 12.0        | 2.3         | 3.0 | C <sub>2</sub> H <sub>4</sub> O <sub>4</sub> N <sub>2</sub> |
| 189.0896 | 2.4                | 189.0916         | -10.2       | -1.9        | 6.5 | C <sub>2</sub> H <sub>4</sub> O <sub>4</sub> N <sub>2</sub> |
|          |                    | 189.0875         | 11.1        | 2.1         | 2.5 | C <sub>2</sub> H <sub>4</sub> O <sub>4</sub> N <sub>2</sub> |
| 207.1014 | 2.0                | 207.1008         | 2.8         | 0.6         | 6.0 | C <sub>2</sub> H <sub>4</sub> O <sub>4</sub> N <sub>2</sub> |
|          |                    | 207.1021         | -3.7        | -0.8        | 5.5 | C <sub>2</sub> H <sub>4</sub> O <sub>4</sub> N <sub>2</sub> |

**Figure S30.** HR-MS (EI) spectral data of *N*-Butyrylpyridine-4-carbohydrazide (**9**)

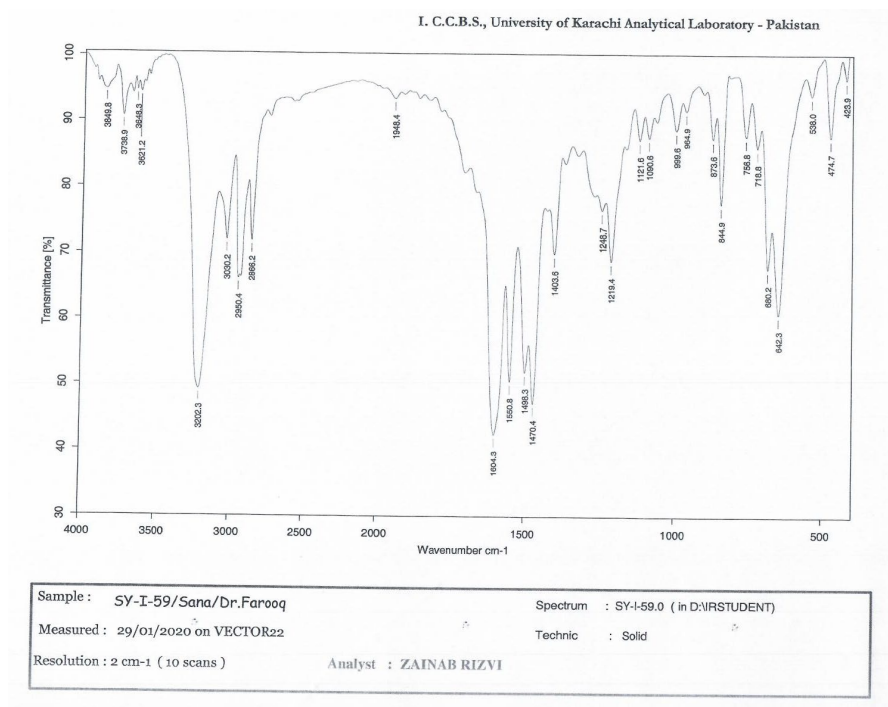

Figure S31. IR spectrum of *N'*-Hexanoylpyridine-4-carbohydrazide (10)

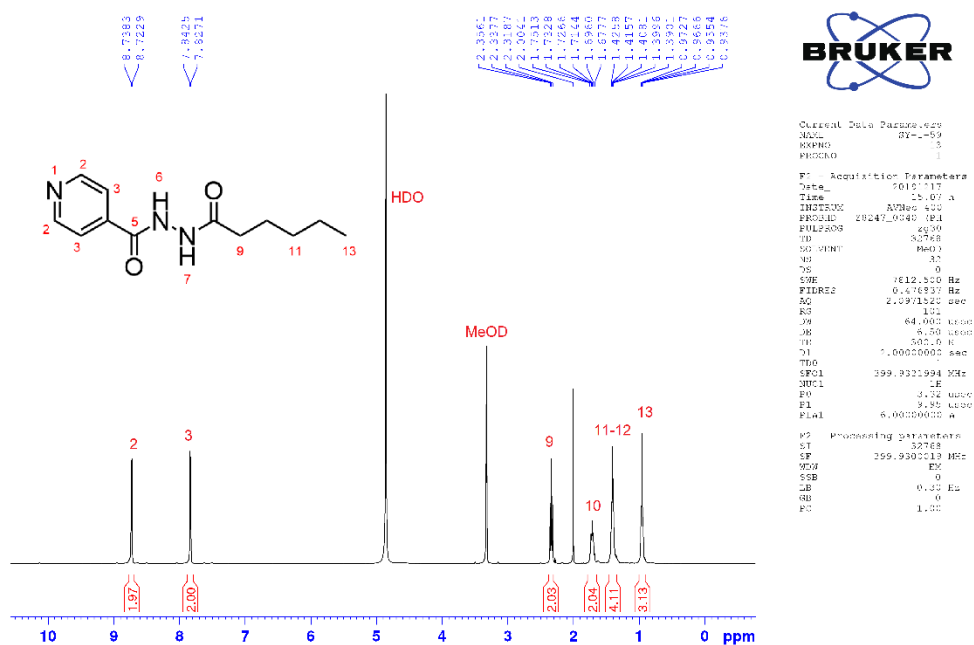

Figure S32.  $^1\text{H}$  NMR spectrum of *N'*-Hexanoylpyridine-4-carbohydrazide (10)

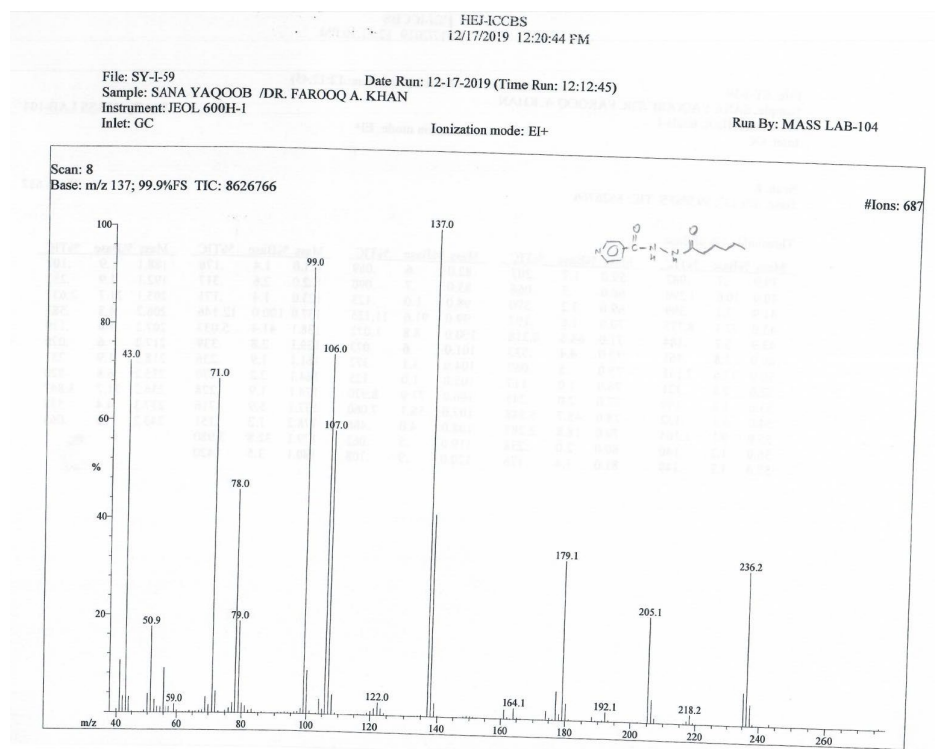

**Figure S33.** LR-MS (EI) spectrum of *N'*-Hexanoylpyridine-4-carbohydrazide (**10**)



File : D:\Data\sy-1-59-020120-c4.RAW  
Full ms [ 49.500 - 700.500 ] - Range: 77.000 - 700.500  
Scan No. 1 of 1

| Mass     | Relative Intensity | Theoretical Mass | Delta [ppm] | Delta [mmu] | RDB  | Composition                                                   |
|----------|--------------------|------------------|-------------|-------------|------|---------------------------------------------------------------|
| 77.9991  | 46.9               | 77.9980          | 14.3        | 1.1         | 5.5  | C <sub>4</sub> O <sub>2</sub> N <sub>1</sub>                  |
| 80.0093  | 1.5                | 80.0110          | -20.4       | -1.6        | 0.0  | C <sub>3</sub> H <sub>4</sub> O <sub>4</sub>                  |
| 81.0305  | 1.5                | 81.0327          | -26.9       | -2.2        | 4.0  | C <sub>3</sub> H <sub>3</sub> N <sub>3</sub>                  |
| 82.0288  | 3.3                | 82.0293          | -6.1        | -0.5        | 3.5  | C <sub>4</sub> H <sub>4</sub> O <sub>2</sub> N <sub>2</sub>   |
| 91.0400  | 1.9                | 91.0395          | 5.6         | 0.5         | 0.5  | C <sub>3</sub> H <sub>4</sub> O <sub>3</sub>                  |
|          |                    | 91.0382          | 20.4        | 1.9         | 1.0  | C <sub>3</sub> H <sub>4</sub> O <sub>2</sub> N <sub>3</sub>   |
|          |                    | 91.0422          | -23.8       | -2.2        | 5.0  | C <sub>4</sub> H <sub>4</sub> N <sub>1</sub>                  |
| 96.0809  | 3.2                | 96.0813          | -4.2        | -0.4        | 2.5  | C <sub>4</sub> H <sub>10</sub> N <sub>1</sub>                 |
| 99.0795  | 75.6               | 99.0796          | -1.1        | -0.1        | 2.0  | C <sub>4</sub> H <sub>8</sub> N <sub>2</sub>                  |
|          |                    | 99.0810          | -14.7       | -1.5        | 1.5  | C <sub>6</sub> H <sub>11</sub> O <sub>1</sub>                 |
| 100.0823 | 4.7                |                  |             |             |      |                                                               |
| 103.0285 | 1.6                | 103.0296         | -11.0       | -1.1        | 6.5  | C <sub>2</sub> H <sub>3</sub> N <sub>2</sub>                  |
|          |                    | 103.0269         | 15.0        | 1.5         | 2.0  | C <sub>2</sub> H <sub>3</sub> O <sub>3</sub> N <sub>1</sub>   |
| 104.0370 | 30.7               | 104.0374         | -4.6        | -0.5        | 6.0  | C <sub>6</sub> H <sub>8</sub> N <sub>2</sub>                  |
|          |                    | 104.0348         | 21.1        | 2.2         | 1.5  | C <sub>3</sub> H <sub>4</sub> O <sub>2</sub> N <sub>1</sub>   |
| 105.0413 | 3.7                | 105.0426         | -12.3       | -1.3        | 1.0  | C <sub>3</sub> H <sub>7</sub> O <sub>3</sub> N <sub>1</sub>   |
| 106.0292 | 66.8               | 106.0293         | -0.9        | -0.1        | 5.5  | C <sub>4</sub> H <sub>4</sub> O <sub>2</sub> N <sub>1</sub>   |
|          |                    | 106.0266         | 24.4        | 2.6         | 1.0  | C <sub>4</sub> H <sub>4</sub> O <sub>4</sub>                  |
| 107.0361 | 33.7               | 107.0371         | -9.1        | -1.0        | 5.0  | C <sub>4</sub> H <sub>4</sub> O <sub>1</sub> N <sub>2</sub>   |
|          |                    | 107.0344         | 16.0        | 1.7         | 0.5  | C <sub>4</sub> H <sub>5</sub> O <sub>4</sub>                  |
|          |                    | 107.0331         | 28.5        | 3.1         | 1.0  | C <sub>4</sub> H <sub>5</sub> O <sub>3</sub> N <sub>3</sub>   |
| 108.0401 | 2.4                | 108.0409         | -7.7        | -0.8        | 0.5  | C <sub>4</sub> H <sub>6</sub> O <sub>3</sub> N <sub>2</sub>   |
|          |                    | 108.0423         | -20.2       | -2.2        | 0.0  | C <sub>4</sub> H <sub>8</sub> O <sub>4</sub>                  |
| 119.0479 | 6.9                | 119.0483         | -3.5        | -0.4        | 6.0  | C <sub>4</sub> H <sub>5</sub> N <sub>3</sub>                  |
|          |                    | 119.0497         | -14.8       | -1.8        | 5.5  | C <sub>4</sub> H <sub>5</sub> N <sub>3</sub>                  |
|          |                    | 119.0457         | 19.0        | 2.3         | 1.5  | C <sub>4</sub> H <sub>7</sub> O <sub>1</sub> N <sub>2</sub>   |
| 120.0535 | 2.9                | 120.0535         | -0.3        | -0.0        | 1.0  | C <sub>4</sub> H <sub>7</sub> O <sub>3</sub> N <sub>2</sub>   |
|          |                    | 120.0562         | -22.7       | -2.7        | 5.5  | C <sub>4</sub> H <sub>8</sub> O <sub>3</sub> N <sub>2</sub>   |
| 121.0413 | 1.1                | 121.0402         | 9.0         | 1.1         | 5.5  | C <sub>4</sub> H <sub>6</sub> N <sub>3</sub>                  |
| 122.0471 | 2.9                | 122.0480         | -7.6        | -0.9        | 5.5  | C <sub>4</sub> H <sub>9</sub> O <sub>1</sub> N <sub>2</sub>   |
|          |                    | 122.0453         | 14.4        | 1.8         | 5.0  | C <sub>4</sub> H <sub>6</sub> O <sub>1</sub> N <sub>2</sub>   |
| 123.0326 | 5.2                | 123.0320         | 4.3         | 0.5         | 0.5  | C <sub>3</sub> H <sub>8</sub> O <sub>4</sub> N <sub>1</sub>   |
|          |                    | 123.0293         | 26.1        | 3.2         | 5.0  | C <sub>4</sub> H <sub>8</sub> O <sub>2</sub> N <sub>1</sub>   |
| 137.0595 | 100.0              | 137.0589         | 4.2         | 0.6         | 0.5  | C <sub>3</sub> H <sub>7</sub> O <sub>5</sub>                  |
|          |                    | 137.0603         | -5.6        | -0.8        | 5.0  | C <sub>4</sub> H <sub>7</sub> O <sub>1</sub> N <sub>3</sub>   |
|          |                    | 137.0562         | 23.8        | 3.3         | 4.5  | C <sub>4</sub> H <sub>8</sub> O <sub>2</sub>                  |
| 138.0644 | 14.9               | 138.0641         | 2.2         | 0.3         | 0.5  | C <sub>4</sub> H <sub>8</sub> O <sub>4</sub> N <sub>2</sub>   |
|          |                    | 138.0667         | -17.2       | -2.4        | 0.0  | C <sub>4</sub> H <sub>10</sub> O <sub>1</sub> N <sub>2</sub>  |
|          |                    | 138.0681         | -26.9       | -3.7        | 4.5  | C <sub>4</sub> H <sub>8</sub> O <sub>1</sub> N <sub>3</sub>   |
| 139.0667 | 1.2                | 139.0633         | 23.9        | 3.3         | 4.0  | C <sub>4</sub> H <sub>10</sub> O <sub>2</sub>                 |
| 161.0583 | 38.1               | 161.0589         | -4.0        | -0.6        | 4.0  | C <sub>4</sub> H <sub>9</sub> O <sub>2</sub> N <sub>1</sub>   |
|          |                    | 161.0603         | -12.3       | -2.0        | 7.0  | C <sub>4</sub> H <sub>9</sub> O <sub>1</sub> N <sub>3</sub>   |
|          |                    | 161.0562         | 12.6        | 2.0         | 6.5  | C <sub>4</sub> H <sub>8</sub> O <sub>2</sub> N <sub>2</sub>   |
| 162.0615 | 3.7                | 162.0641         | -16.0       | -2.6        | 2.5  | C <sub>4</sub> H <sub>10</sub> O <sub>1</sub> N <sub>2</sub>  |
| 174.0660 | 31.9               | 174.0667         | -4.3        | -0.7        | 2.0  | C <sub>4</sub> H <sub>8</sub> O <sub>2</sub> N <sub>2</sub>   |
|          |                    | 174.0681         | 11.1        | 1.9         | 7.5  | C <sub>4</sub> H <sub>8</sub> O <sub>1</sub> N <sub>3</sub>   |
|          |                    | 174.0746         | -12.0       | -2.1        | 3.0  | C <sub>4</sub> H <sub>10</sub> O <sub>1</sub> N <sub>2</sub>  |
| 175.0737 | 6.8                | 175.0746         | -4.9        | -0.8        | 7.0  | C <sub>4</sub> H <sub>10</sub> O <sub>2</sub>                 |
|          |                    | 175.0719         | 10.5        | 1.8         | 7.0  | C <sub>4</sub> H <sub>9</sub> O <sub>1</sub> N <sub>3</sub>   |
|          |                    | 175.0759         | -12.5       | -2.2        | 2.5  | C <sub>4</sub> H <sub>11</sub> O <sub>1</sub> N <sub>2</sub>  |
| 177.1152 | 2.7                | 177.1154         | -1.0        | -0.2        | 6.5  | C <sub>4</sub> H <sub>11</sub> O <sub>2</sub>                 |
|          |                    | 177.1127         | 14.1        | 2.5         | 5.0  | C <sub>4</sub> H <sub>13</sub> O <sub>1</sub> N <sub>1</sub>  |
|          |                    | 177.1113         | 21.7        | 3.8         | 0.5  | C <sub>4</sub> H <sub>9</sub> O <sub>1</sub>                  |
| 179.0699 | 11.8               | 179.0695         | 2.3         | 0.4         | 1.0  | C <sub>6</sub> H <sub>15</sub> O <sub>3</sub> N <sub>3</sub>  |
|          |                    | 179.0708         | -5.2        | -0.9        | 6.0  | C <sub>6</sub> H <sub>9</sub> O <sub>2</sub> N <sub>3</sub>   |
|          |                    | 179.0668         | 17.3        | 3.1         | 5.5  | C <sub>10</sub> H <sub>11</sub> O <sub>3</sub> N <sub>2</sub> |
|          |                    | 179.0735         | -20.1       | -3.6        | 1.5  | C <sub>9</sub> H <sub>11</sub> O <sub>3</sub> N <sub>2</sub>  |
| 180.0717 | 1.2                | 180.0687         | 16.2        | 2.9         | 10.0 | C <sub>13</sub> H <sub>9</sub> N <sub>1</sub>                 |
|          |                    | 180.0746         | -16.4       | -3.0        | 10.0 | C <sub>12</sub> H <sub>4</sub> N <sub>2</sub>                 |
| 188.0814 | 9.5                | 188.0824         | -5.4        | -1.0        | 1.0  | C <sub>9</sub> H <sub>15</sub> O <sub>3</sub> N <sub>2</sub>  |
|          |                    | 188.0797         | 8.8         | 1.7         | 7.5  | C <sub>10</sub> H <sub>10</sub> O <sub>1</sub> N <sub>3</sub> |
|          |                    | 188.0837         | -12.6       | -2.4        | 3.0  | C <sub>7</sub> H <sub>12</sub> O <sub>4</sub> N <sub>2</sub>  |
| 189.0871 | 1.7                | 189.0875         | -2.2        | -0.4        | 7.0  | C <sub>12</sub> H <sub>12</sub> O <sub>2</sub>                |
|          |                    | 189.0902         | -16.3       | -3.1        | 2.5  | C <sub>7</sub> H <sub>13</sub> O <sub>4</sub> N <sub>2</sub>  |
|          |                    | 189.0916         | -23.4       | -4.4        | 7.0  | C <sub>10</sub> H <sub>11</sub> O <sub>1</sub> N <sub>3</sub> |
| 205.1090 | 7.2                | 205.1103         | -6.5        | -1.3        | 6.5  | C <sub>12</sub> H <sub>13</sub> O <sub>2</sub>                |
|          |                    | 205.1076         | 6.6         | 1.4         | 6.0  | C <sub>12</sub> H <sub>15</sub> O <sub>2</sub> N <sub>1</sub> |
|          |                    |                  |             |             | 1.5  | C <sub>9</sub> H <sub>13</sub> O <sub>5</sub>                 |

| Mass     | Relative Intensity | Theoretical Mass | Delta [ppm] | Delta [mmu] | RDB  | Composition                                                   |
|----------|--------------------|------------------|-------------|-------------|------|---------------------------------------------------------------|
|          |                    | 205.1063         | 13.2        | 2.7         | 2.0  | C <sub>7</sub> H <sub>15</sub> O <sub>4</sub> N <sub>3</sub>  |
| 206.1075 | 1.6                | 206.1055         | 9.6         | 2.0         | 6.0  | C <sub>11</sub> H <sub>14</sub> O <sub>2</sub> N <sub>2</sub> |
|          |                    | 206.1096         | -9.9        | -2.0        | 10.0 | C <sub>16</sub> H <sub>14</sub>                               |
|          |                    | 206.1028         | 22.6        | 4.7         | 1.5  | C <sub>9</sub> H <sub>16</sub> O <sub>3</sub> N <sub>1</sub>  |
| 217.1225 | 3.1                | 217.1229         | -1.6        | -0.4        | 6.5  | C <sub>14</sub> H <sub>12</sub> O <sub>2</sub>                |
|          |                    | 217.1215         | 4.5         | 1.0         | 7.0  | C <sub>12</sub> H <sub>15</sub> O <sub>1</sub> N <sub>3</sub> |
|          |                    | 217.1188         | 16.9        | 3.7         | 2.5  | C <sub>9</sub> H <sub>17</sub> O <sub>1</sub> N <sub>2</sub>  |
| 235.1312 | 1.8                | 235.1321         | -3.8        | -0.9        | 6.0  | C <sub>12</sub> H <sub>17</sub> O <sub>2</sub> N <sub>3</sub> |
|          |                    | 235.1294         | 7.6         | 1.8         | 1.5  | C <sub>9</sub> H <sub>19</sub> O <sub>1</sub> N <sub>2</sub>  |
|          |                    | 235.1334         | -9.5        | -2.2        | 5.5  | C <sub>14</sub> H <sub>14</sub> O <sub>3</sub>                |
|          |                    | 235.1361         | -20.9       | -4.9        | 10.0 | C <sub>17</sub> H <sub>17</sub> N <sub>1</sub>                |

Figure S34. HR-MS (EI) spectral data of *N*-Hexanoylpyridine-4-carbohydrazide (10)



HEJ-ICCBS  
2/18/2020 12:13:10 PM

File: SY-J-97  
Sample: SANA YAQOOB /DR. FAROOQ  
Instrument: JEOL 600H-1  
Inlet: Direct Probe

Date Run: 02-18-2020 (Time Run: 11:52:06)

Run By: MASS LAB-104

Ionization mode: EI+

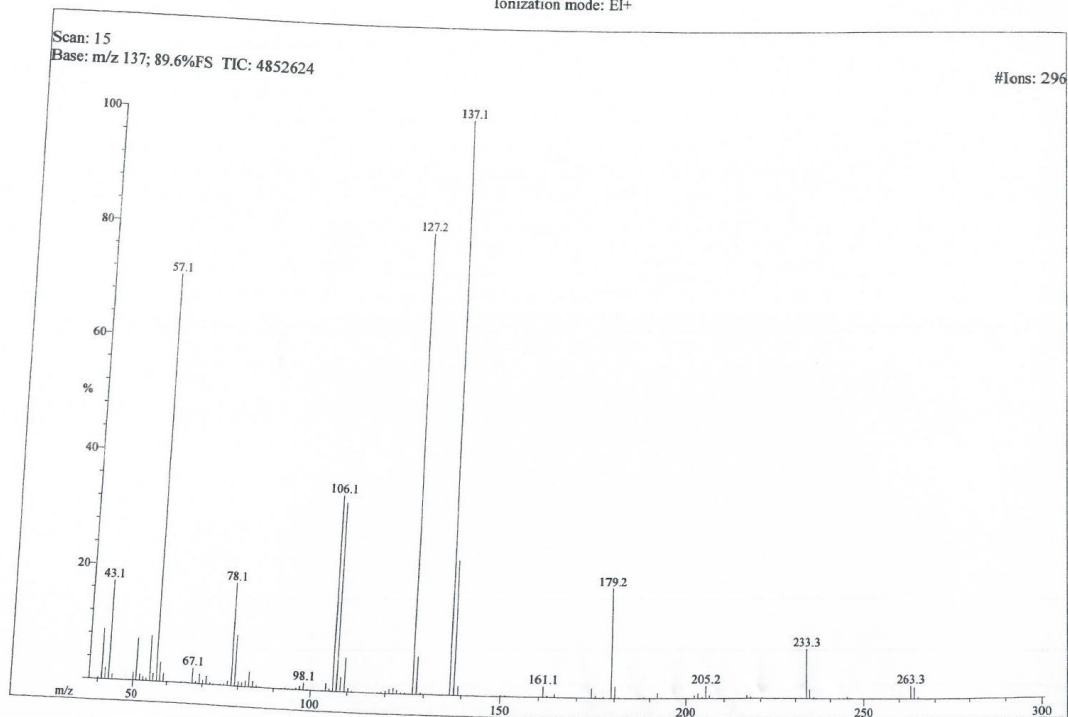

**Figure S37.** LR-MS (EI) spectrum of *N'*-Octanoylpyridine-4-carbohydrazide (**11**)

File : D:\Data\sy-1-97-130320-c9.RAW  
Full ms [ 49.500 - 700.500 ] - Range: 92.000 - 265.000  
Scan No. 1 of 1

| Mass     | Relative<br>Intensity | Theoretical<br>Mass | Delta<br>[ppm] | Delta<br>[mmu] | RDB  | Composition                                                  |
|----------|-----------------------|---------------------|----------------|----------------|------|--------------------------------------------------------------|
| 92.0357  | 0.6                   | 92.0348             | 9.9            | 0.9            | 0.5  | C <sub>2</sub> H <sub>6</sub> O <sub>3</sub> N <sub>1</sub>  |
| 93.0694  | 0.8                   | 92.0374             | -19.2          | -1.8           | 5.0  | C <sub>3</sub> H <sub>8</sub> N <sub>2</sub>                 |
| 94.0703  | 0.7                   | 93.0704             | -10.8          | -1.0           | 3.5  | C <sub>3</sub> H <sub>8</sub>                                |
| 95.0867  | 1.8                   | 95.0861             | 6.3            | 0.6            | 2.5  | C <sub>7</sub> H <sub>11</sub>                               |
| 96.0859  | 2.1                   |                     |                |                |      |                                                              |
| 97.0678  | 1.2                   | 97.0653             | 25.5           | 2.5            | 2.5  | C <sub>6</sub> H <sub>8</sub> O <sub>1</sub>                 |
| 97.1001  | 2.7                   | 97.1017             | -16.7          | -1.6           | 1.5  | C <sub>9</sub> H <sub>13</sub>                               |
| 98.0724  | 2.6                   | 98.0718             | 6.4            | 0.6            | 2.5  | C <sub>4</sub> H <sub>6</sub> N <sub>3</sub>                 |
|          |                       | 98.0732             | -7.3           | -0.7           | 2.0  | C <sub>6</sub> H <sub>10</sub> O <sub>1</sub>                |
| 98.1077  | 0.6                   | 98.1096             | -18.5          | -1.8           | 1.0  | C <sub>7</sub> H <sub>14</sub>                               |
| 99.0734  | 0.5                   |                     |                |                |      |                                                              |
| 100.0749 | 0.6                   | 100.0762            | -13.2          | -1.3           | 1.5  | C <sub>9</sub> H <sub>10</sub> O <sub>2</sub> N <sub>1</sub> |
| 104.0383 | 5.3                   | 104.0374            | 8.4            | 0.9            | 6.0  | C <sub>6</sub> H <sub>8</sub> N <sub>2</sub>                 |
| 105.0461 | 1.7                   | 105.0453            | 8.3            | 0.9            | 5.5  | C <sub>6</sub> H <sub>8</sub> N <sub>2</sub>                 |
| 106.0290 | 42.0                  | 106.0293            | -2.9           | -0.3           | 5.5  | C <sub>6</sub> H <sub>8</sub> O <sub>1</sub> N <sub>1</sub>  |
|          |                       | 106.0266            | 22.4           | 2.4            | 1.0  | C <sub>3</sub> H <sub>4</sub> O <sub>4</sub>                 |
| 107.0366 | 31.2                  | 107.0371            | -4.3           | -0.5           | 5.0  | C <sub>6</sub> H <sub>8</sub> O <sub>1</sub> N <sub>1</sub>  |
|          |                       | 107.0344            | 20.7           | 2.2            | 0.5  | C <sub>3</sub> H <sub>4</sub> O <sub>4</sub>                 |
| 107.0849 | 0.6                   | 107.0861            | -11.2          | -1.2           | 3.5  | C <sub>3</sub> H <sub>4</sub> O <sub>4</sub>                 |
| 108.0414 | 2.5                   | 108.0409            | 4.4            | 0.5            | 0.5  | C <sub>3</sub> H <sub>4</sub> O <sub>4</sub>                 |
|          |                       | 108.0423            | -8.1           | -0.9           | 0.0  | C <sub>3</sub> H <sub>4</sub> O <sub>4</sub> N <sub>3</sub>  |
| 108.0870 | 0.5                   |                     |                |                |      |                                                              |
| 109.1017 | 8.3                   | 109.1017            | -0.7           | -0.1           | 2.5  | C <sub>8</sub> H <sub>13</sub>                               |
| 110.1037 | 1.7                   |                     |                |                |      |                                                              |
| 111.0816 | 0.6                   | 111.0810            | 5.1            | 0.6            | 2.5  | C <sub>7</sub> H <sub>11</sub> O <sub>1</sub>                |
|          |                       | 111.0796            | 17.2           | 1.9            | 3.0  | C <sub>3</sub> H <sub>4</sub> N <sub>3</sub>                 |
| 111.1159 | 0.9                   | 111.1174            | -13.4          | -1.5           | 1.5  | C <sub>8</sub> H <sub>13</sub>                               |
| 112.0783 | 0.8                   | 112.0762            | 18.5           | 2.1            | 2.5  | C <sub>6</sub> H <sub>10</sub> O <sub>1</sub> N <sub>1</sub> |
| 114.0921 | 0.8                   | 114.0919            | 1.8            | 0.2            | 1.5  | C <sub>6</sub> H <sub>10</sub> O <sub>1</sub> N <sub>1</sub> |
| 118.0602 | 0.6                   | 118.0617            | -12.2          | -1.4           | 1.5  | C <sub>3</sub> H <sub>4</sub> O <sub>4</sub> N <sub>3</sub>  |
|          |                       | 118.0630            | -23.6          | -2.8           | 1.0  | C <sub>5</sub> H <sub>10</sub> O <sub>3</sub>                |
| 119.0480 | 4.4                   | 119.0483            | -3.1           | -0.4           | 6.0  | C <sub>6</sub> H <sub>8</sub> N <sub>3</sub>                 |
|          |                       | 119.0497            | -14.4          | -1.7           | 5.5  | C <sub>6</sub> H <sub>8</sub> N <sub>3</sub>                 |
| 120.0544 | 3.3                   | 119.0457            | 19.4           | 2.3            | 1.5  | C <sub>3</sub> H <sub>4</sub> O <sub>4</sub>                 |
|          |                       | 120.0535            | 7.9            | 1.0            | 1.0  | C <sub>3</sub> H <sub>4</sub> O <sub>3</sub> N <sub>2</sub>  |
|          |                       | 120.0562            | -14.4          | -1.7           | 5.5  | C <sub>3</sub> H <sub>4</sub> O <sub>3</sub> N <sub>2</sub>  |
|          |                       | 120.0575            | -25.6          | -3.1           | 5.0  | C <sub>6</sub> H <sub>8</sub> N <sub>3</sub>                 |
| 121.0417 | 1.3                   | 121.0402            | 12.6           | 1.5            | 5.5  | C <sub>6</sub> H <sub>8</sub> O <sub>1</sub> N <sub>2</sub>  |
| 122.0482 | 3.0                   | 122.0480            | 1.6            | 0.2            | 5.0  | C <sub>6</sub> H <sub>8</sub> O <sub>1</sub> N <sub>2</sub>  |
|          |                       | 122.0453            | 23.5           | 2.9            | 0.5  | C <sub>6</sub> H <sub>8</sub> O <sub>1</sub> N <sub>2</sub>  |
| 122.0981 | 1.0                   | 122.0970            | 9.4            | 1.1            | 3.5  | C <sub>3</sub> H <sub>4</sub> O <sub>4</sub> N <sub>1</sub>  |
| 123.0530 | 1.9                   | 123.0532            | -1.3           | -0.2           | 0.0  | C <sub>3</sub> H <sub>4</sub> O <sub>4</sub> N <sub>1</sub>  |
|          |                       | 123.0558            | -23.1          | -2.8           | 4.5  | C <sub>4</sub> H <sub>7</sub> O <sub>1</sub> N <sub>2</sub>  |
| 123.1129 | 0.8                   |                     |                |                |      |                                                              |
| 124.1162 | 0.7                   | 124.1126            | 29.0           | 3.6            | 2.5  | C <sub>3</sub> H <sub>4</sub> N <sub>1</sub>                 |
| 125.0968 | 0.6                   | 125.0966            | 1.1            | 0.1            | 2.5  | C <sub>3</sub> H <sub>4</sub> N <sub>1</sub>                 |
|          |                       | 125.0953            | 11.8           | 1.5            | 3.0  | C <sub>3</sub> H <sub>4</sub> N <sub>1</sub>                 |
| 126.0941 | 1.1                   | 126.0919            | 17.9           | 2.3            | 2.5  | C <sub>3</sub> H <sub>4</sub> N <sub>1</sub>                 |
| 127.1120 | 65.7                  | 127.1123            | -2.4           | -0.3           | 1.5  | C <sub>6</sub> H <sub>12</sub> O <sub>1</sub> N <sub>1</sub> |
|          |                       | 127.1109            | 8.2            | 1.0            | 2.0  | C <sub>6</sub> H <sub>12</sub> O <sub>1</sub>                |
| 128.1157 | 6.3                   | 128.1188            | -24.0          | -3.1           | 1.5  | C <sub>6</sub> H <sub>12</sub> N <sub>3</sub>                |
| 136.1133 | 0.7                   | 136.1126            | 5.2            | 0.7            | 3.5  | C <sub>6</sub> H <sub>14</sub> N <sub>3</sub>                |
| 137.0575 | 95.1                  | 137.0562            | 9.3            | 1.3            | 0.5  | C <sub>3</sub> H <sub>4</sub> O <sub>4</sub> N <sub>2</sub>  |
|          |                       | 137.0589            | -10.3          | -1.4           | 5.0  | C <sub>3</sub> H <sub>4</sub> O <sub>4</sub> N <sub>2</sub>  |
|          |                       | 137.0603            | -20.1          | -2.7           | 4.5  | C <sub>6</sub> H <sub>8</sub> O <sub>1</sub> N <sub>3</sub>  |
| 138.0654 | 20.5                  | 138.0641            | 9.5            | 1.3            | 0.0  | C <sub>6</sub> H <sub>8</sub> O <sub>1</sub>                 |
|          |                       | 138.0667            | -9.9           | -1.4           | 4.5  | C <sub>6</sub> H <sub>8</sub> O <sub>1</sub> N <sub>2</sub>  |
|          |                       | 138.0681            | -19.6          | -2.7           | 4.0  | C <sub>6</sub> H <sub>8</sub> O <sub>1</sub> N <sub>3</sub>  |
| 139.0686 | 2.2                   |                     |                |                |      |                                                              |
| 148.0512 | 0.7                   | 148.0511            | 0.9            | 0.1            | 6.5  | C <sub>3</sub> H <sub>4</sub> O <sub>2</sub> N <sub>3</sub>  |
|          |                       | 148.0524            | -8.2           | -1.2           | 6.0  | C <sub>3</sub> H <sub>4</sub> O <sub>2</sub>                 |
| 149.0243 | 0.8                   | 148.0484            | 19.0           | 2.8            | 2.0  | C <sub>3</sub> H <sub>4</sub> O <sub>2</sub> N <sub>2</sub>  |
|          |                       | 149.0239            | 3.0            | 0.4            | 6.5  | C <sub>3</sub> H <sub>4</sub> O <sub>2</sub>                 |
|          |                       | 149.0225            | 12.0           | 1.8            | 7.0  | C <sub>6</sub> H <sub>12</sub> O <sub>2</sub> N <sub>3</sub> |
| 161.0593 | 28.4                  | 149.0265            | -15.0          | -2.2           | 11.0 | C <sub>11</sub> H <sub>13</sub> N <sub>1</sub>               |
|          |                       | 161.0589            | 2.1            | 0.3            | 7.0  | C <sub>8</sub> H <sub>7</sub> O <sub>1</sub> N <sub>3</sub>  |

| Mass     | Relative<br>Intensity | Theoretical<br>Mass | Delta<br>[ppm] | Delta<br>[mmu] | RDB  | Composition                                                   |
|----------|-----------------------|---------------------|----------------|----------------|------|---------------------------------------------------------------|
|          |                       | 263.1607            | 8.0            | 2.1            | 1.5  | C <sub>11</sub> H <sub>23</sub> O <sub>2</sub> N <sub>2</sub> |
|          |                       | 263.1674            | -17.4          | -4.6           | 10.0 | C <sub>19</sub> H <sub>21</sub> N <sub>1</sub>                |
| 264.1705 | 0.8                   | 264.1712            | -2.8           | -0.7           | 5.5  | C <sub>14</sub> H <sub>22</sub> O <sub>2</sub> N <sub>3</sub> |
|          |                       | 264.1685            | 7.3            | 1.9            | 1.0  | C <sub>11</sub> H <sub>24</sub> O <sub>2</sub> N <sub>2</sub> |
|          |                       | 264.1725            | -7.9           | -2.1           | 5.0  | C <sub>11</sub> H <sub>24</sub> O <sub>3</sub>                |
|          |                       | 264.1752            | -18.1          | -4.8           | 9.5  | C <sub>19</sub> H <sub>22</sub> N <sub>1</sub>                |
|          |                       | 264.1626            | 29.5           | 7.8            | 10.0 | C <sub>10</sub> H <sub>20</sub> N <sub>2</sub>                |

Figure S38. HR-MS (EI) spectral data of N'-Octanoylpyridine-4-carbohydrazide (11)

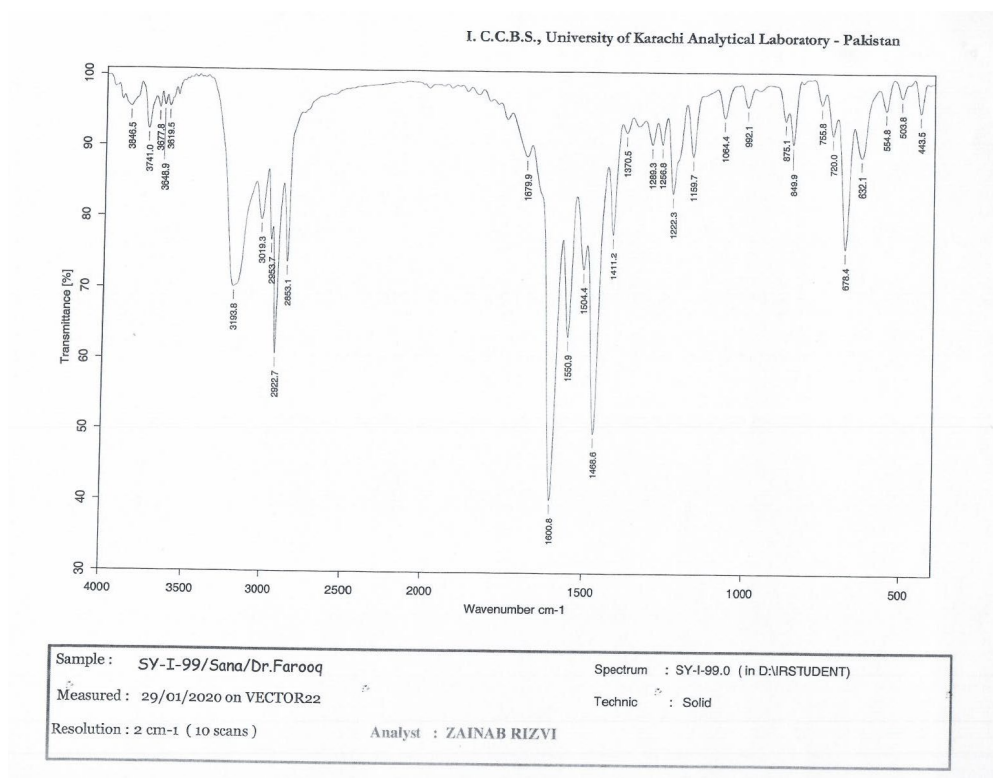

**Figure S39.** IR spectrum of *N'*-Decanoylpyridine-4-carbohydrazide (**12**)

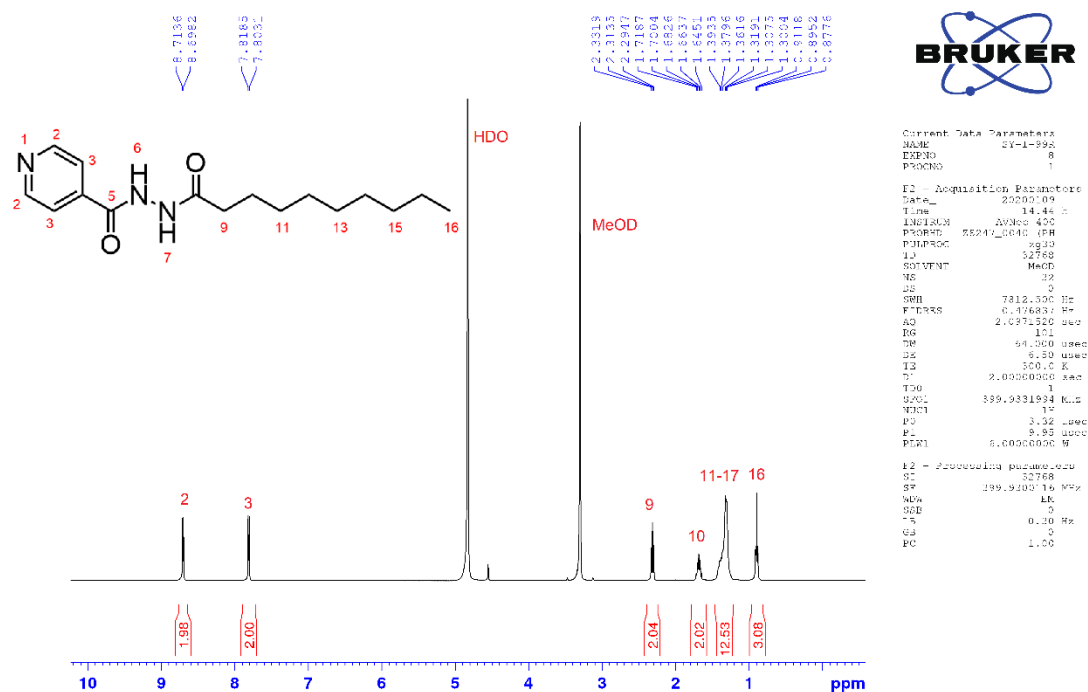

**Figure S40.**  $^1\text{H}$  NMR spectrum of *N'*-Decanoylpyridine-4-carbohydrazide (**12**)

HEJ-CCBS  
1/31/2020 11:11:43 AM

File: SY-I-99  
Sample: SANA YAQOOB /DR. FAROOQ  
Instrument: JEOL 600H-1  
Inlet: Direct Probe

Date Run: 01-31-2020 (Time Run: 09:43:06)

Ionization mode: EI+

Run By: MASS LAB-104

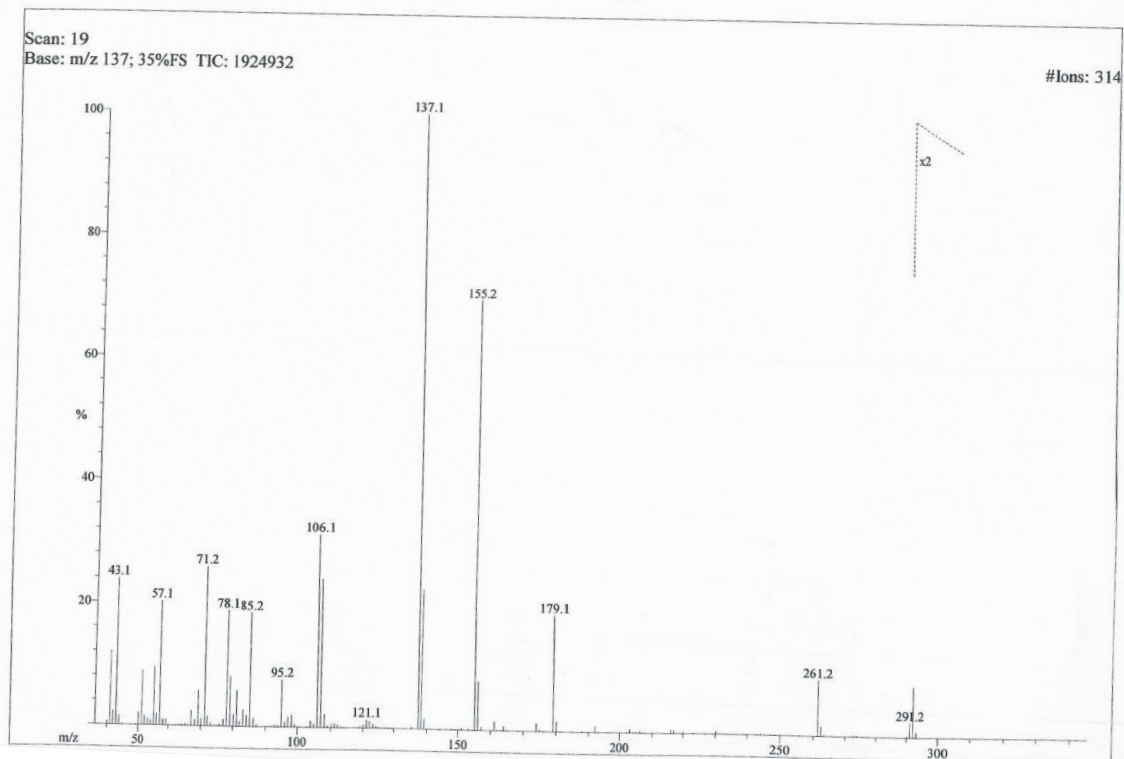

**Figure S41.** LR-MS (EI) spectrum of *N'*-Decanoylpyridine-4-carbohydrazide (**12**)



File : D:\Data\sy-i-99\_180220-cl3.RAW

Full ms [ 49.500 - 750.500 ] - Range: 101.000 - 293.000

Scan No. 1 of 1

| Mass     | Relative<br>Intensity | Theoretical<br>Mass | Delta<br>[ppm] | Delta<br>[mmu] | RDB | Composition                                                  |
|----------|-----------------------|---------------------|----------------|----------------|-----|--------------------------------------------------------------|
| 101.0157 | 0.1                   |                     |                |                | 1.5 | C <sub>5</sub> H <sub>9</sub> O <sub>2</sub>                 |
| 101.0573 | 0.2                   | 101.0603            | -28.9          | -2.9           | 2.5 | C <sub>5</sub> H <sub>4</sub> O <sub>2</sub> N <sub>3</sub>  |
| 102.0296 | 0.2                   | 102.0304            | -7.4           | -0.8           | 2.0 | C <sub>4</sub> H <sub>6</sub> O <sub>3</sub>                 |
|          |                       | 102.0317            | -20.6          | -2.1           | 2.0 | C <sub>5</sub> H <sub>6</sub> O <sub>3</sub> N <sub>2</sub>  |
| 102.0447 | 0.2                   | 102.0429            | 17.5           | 1.8            | 1.0 | C <sub>5</sub> H <sub>10</sub> O <sub>2</sub>                |
| 102.0678 | 0.0                   | 102.0681            | -3.0           | -0.3           | 2.0 | C <sub>3</sub> H <sub>5</sub> O <sub>3</sub> N <sub>1</sub>  |
| 103.0296 | 1.8                   | 103.0269            | 25.6           | 2.6            | 1.5 | C <sub>3</sub> H <sub>6</sub> O <sub>3</sub> N <sub>1</sub>  |
| 104.0368 | 28.1                  | 104.0348            | 19.5           | 2.0            | 1.0 | C <sub>3</sub> H <sub>7</sub> O <sub>3</sub> N <sub>1</sub>  |
| 104.0990 | 0.0                   |                     |                |                | 1.0 | C <sub>3</sub> H <sub>5</sub> O <sub>3</sub> N <sub>1</sub>  |
| 105.0435 | 5.2                   | 105.0426            | 8.7            | 0.9            | 1.5 | C <sub>1</sub> H <sub>5</sub> O <sub>2</sub> N <sub>4</sub>  |
|          |                       | 105.0413            | 21.5           | 2.3            | 1.0 | C <sub>3</sub> H <sub>6</sub> O <sub>4</sub>                 |
| 106.0288 | 23.7                  | 106.0266            | 20.9           | 2.2            | 0.5 | C <sub>3</sub> H <sub>7</sub> O <sub>4</sub>                 |
| 106.5438 | 0.0                   |                     |                |                | 1.0 | C <sub>2</sub> H <sub>5</sub> O <sub>3</sub> N <sub>3</sub>  |
| 107.0351 | 6.7                   | 107.0344            | 6.4            | 0.7            | 0.5 | C <sub>2</sub> H <sub>5</sub> O <sub>3</sub> N <sub>3</sub>  |
|          |                       | 107.0331            | 18.9           | 2.0            | 0.0 | C <sub>1</sub> H <sub>6</sub> O <sub>3</sub> N <sub>3</sub>  |
| 107.0835 | 0.8                   |                     |                |                | 0.5 | C <sub>3</sub> H <sub>6</sub> O <sub>4</sub>                 |
| 107.5522 | 0.1                   |                     |                |                | 0.0 | C <sub>3</sub> H <sub>6</sub> O <sub>4</sub>                 |
| 108.0407 | 0.8                   | 108.0409            | -2.1           | -0.2           | 0.5 | C <sub>3</sub> H <sub>6</sub> O <sub>4</sub>                 |
|          |                       | 108.0423            | -14.5          | -1.6           | 0.0 |                                                              |
| 108.0811 | 1.2                   |                     |                |                | 5.0 | C <sub>4</sub> H <sub>2</sub> O <sub>2</sub> N <sub>2</sub>  |
| 109.0541 | 0.4                   |                     |                |                |     |                                                              |
| 109.0926 | 0.7                   |                     |                |                |     |                                                              |
| 110.0077 | 0.0                   |                     |                |                |     |                                                              |
| 110.0116 | 0.0                   | 110.0116            | -0.3           | -0.0           | 5.0 | C <sub>4</sub> H <sub>2</sub> O <sub>2</sub> N <sub>2</sub>  |
| 110.0565 | 0.3                   |                     |                |                |     |                                                              |
| 110.0969 | 7.0                   |                     |                |                |     |                                                              |
| 111.1025 | 1.9                   |                     |                |                |     |                                                              |
| 112.0330 | 0.0                   |                     |                |                |     |                                                              |
| 112.0820 | 0.6                   |                     |                |                |     |                                                              |
| 112.1229 | 0.4                   |                     |                |                | 3.5 | C <sub>4</sub> H <sub>5</sub> O <sub>2</sub> N <sub>2</sub>  |
| 113.0380 | 0.1                   | 113.0351            | 25.7           | 2.9            | 3.0 | C <sub>4</sub> H <sub>5</sub> O <sub>2</sub> N <sub>2</sub>  |
| 113.0866 | 0.2                   |                     |                |                |     |                                                              |
| 113.1302 | 0.1                   |                     |                |                | 3.0 | C <sub>4</sub> H <sub>6</sub> O <sub>2</sub> N <sub>2</sub>  |
| 114.0437 | 0.1                   | 114.0429            | 6.5            | 0.7            | 3.0 | C <sub>4</sub> H <sub>6</sub> O <sub>2</sub> N <sub>2</sub>  |
| 114.0930 | 0.2                   |                     |                |                |     |                                                              |
| 114.1329 | 0.0                   |                     |                |                |     |                                                              |
| 114.5609 | 0.0                   |                     |                |                |     |                                                              |
| 115.0583 | 0.5                   |                     |                |                | 1.5 | C <sub>6</sub> H <sub>11</sub> O <sub>2</sub>                |
| 115.0747 | 0.5                   | 115.0759            | -10.4          | -1.2           | 1.5 | C <sub>6</sub> H <sub>11</sub> O <sub>2</sub>                |
| 116.0544 | 0.5                   |                     |                |                |     |                                                              |
| 117.0607 | 1.0                   |                     |                |                | 1.5 | C <sub>3</sub> H <sub>8</sub> O <sub>2</sub> N <sub>3</sub>  |
| 118.0620 | 1.7                   | 118.0617            | 2.6            | 0.3            | 1.0 | C <sub>5</sub> H <sub>10</sub> O <sub>3</sub>                |
|          |                       | 118.0630            | -8.7           | -1.0           | 1.5 | C <sub>3</sub> H <sub>7</sub> O <sub>3</sub> N <sub>2</sub>  |
| 119.0484 | 11.3                  | 119.0457            | 22.7           | 2.7            | 1.0 | C <sub>3</sub> H <sub>8</sub> O <sub>3</sub> N <sub>2</sub>  |
| 120.0516 | 10.1                  | 120.0535            | -16.1          | -1.9           | 0.0 | C <sub>3</sub> H <sub>11</sub> O <sub>2</sub> N <sub>3</sub> |
| 121.0444 | 1.3                   |                     |                |                | 1.0 | C <sub>3</sub> H <sub>6</sub> O <sub>4</sub> N <sub>2</sub>  |
| 121.0877 | 0.4                   | 121.0851            | 21.2           | 2.6            | 5.0 | C <sub>3</sub> H <sub>6</sub> O <sub>2</sub>                 |
| 122.0341 | 6.4                   | 122.0328            | 11.1           | 1.4            | 0.0 | C <sub>2</sub> H <sub>10</sub> O <sub>2</sub> N <sub>4</sub> |
|          |                       | 122.0368            | -21.8          | -2.7           | 1.5 | H <sub>3</sub> O <sub>4</sub> N <sub>4</sub>                 |
| 122.0825 | 1.8                   | 122.0804            | 17.4           | 2.1            |     |                                                              |
| 123.0139 | 4.8                   | 123.0154            | -12.2          | -1.5           |     |                                                              |
| 123.0814 | 0.5                   |                     |                |                | 0.5 | C <sub>1</sub> H <sub>6</sub> O <sub>4</sub> N <sub>3</sub>  |
| 123.9692 | 0.1                   |                     |                |                |     |                                                              |
| 124.0109 | 0.4                   |                     |                |                |     |                                                              |
| 124.0335 | 0.4                   | 124.0358            | -19.1          | -2.4           |     |                                                              |
| 124.0862 | 3.4                   |                     |                |                |     |                                                              |
| 124.9688 | 0.0                   |                     |                |                |     |                                                              |
| 125.0160 | 0.1                   |                     |                |                |     |                                                              |
| 125.0847 | 0.5                   |                     |                |                | 5.0 | C <sub>4</sub> H <sub>2</sub> O <sub>3</sub> N <sub>2</sub>  |
| 126.0065 | 0.0                   | 126.0065            | -0.2           | -0.0           | 3.5 | C <sub>6</sub> H <sub>8</sub> O <sub>2</sub> N <sub>1</sub>  |
| 126.0531 | 0.2                   | 126.0555            | -19.4          | -2.4           |     |                                                              |
| 126.0993 | 0.1                   |                     |                |                |     |                                                              |
| 126.8628 | 0.0                   |                     |                |                | 5.0 | C <sub>3</sub> H <sub>1</sub> O <sub>3</sub> N <sub>3</sub>  |
| 127.0018 | 0.2                   | 127.0018            | 0.4            | 0.1            | 4.5 | C <sub>5</sub> H <sub>3</sub> O <sub>4</sub>                 |
|          |                       | 127.0031            | -10.1          | -1.3           | 3.0 | C <sub>6</sub> H <sub>5</sub> O <sub>2</sub> N <sub>1</sub>  |
| 127.0631 | 0.1                   | 127.0633            | -1.7           | -0.2           |     |                                                              |
| 127.1032 | 0.0                   |                     |                |                |     |                                                              |



| Mass     | Relative Intensity | Theoretical Mass | Delta [ppm] | Delta [mmu] | RDB  | Compositor                                                    |
|----------|--------------------|------------------|-------------|-------------|------|---------------------------------------------------------------|
| 272.1744 | 1.6                | 272.1736         | 2.9         | 0.8         | 3.0  | C <sub>13</sub> H <sub>24</sub> O <sub>4</sub> N <sub>2</sub> |
|          |                    | 272.1776         | -11.8       | -3.2        | 7.0  | C <sub>18</sub> H <sub>24</sub> O <sub>2</sub>                |
| 273.0768 | 0.0                | 273.0750         | 6.9         | 1.9         | 10.0 | C <sub>13</sub> H <sub>11</sub> O <sub>4</sub> N <sub>3</sub> |
|          |                    | 273.0790         | -7.8        | -2.1        | 14.0 | C <sub>18</sub> H <sub>11</sub> O <sub>2</sub> N <sub>1</sub> |
| 273.1810 | 4.6                | 273.1814         | -1.7        | -0.5        | 2.5  | C <sub>13</sub> H <sub>25</sub> O <sub>4</sub> N <sub>2</sub> |
|          |                    | 273.1855         | -16.4       | -4.5        | 6.5  | C <sub>18</sub> H <sub>25</sub> O <sub>2</sub>                |
|          |                    | 273.1729         | 29.6        | 8.1         | 7.0  | C <sub>17</sub> H <sub>23</sub> O <sub>2</sub> N <sub>1</sub> |
| 274.1871 | 1.0                | 274.1893         | -7.9        | -2.2        | 2.0  | C <sub>13</sub> H <sub>26</sub> O <sub>4</sub> N <sub>2</sub> |
|          |                    | 274.1933         | -22.6       | -6.2        | 6.0  | C <sub>18</sub> H <sub>26</sub> O <sub>2</sub>                |
|          |                    | 274.1807         | 23.3        | 6.4         | 6.5  | C <sub>17</sub> H <sub>24</sub> O <sub>2</sub> N <sub>1</sub> |
| 275.0749 | 0.0                | 275.0780         | -11.3       | -3.1        | 9.5  | C <sub>12</sub> H <sub>11</sub> O <sub>4</sub> N <sub>4</sub> |
|          |                    | 275.0708         | 14.9        | 4.1         | 13.5 | C <sub>18</sub> H <sub>11</sub> O <sub>3</sub>                |
|          |                    | 275.0695         | 19.8        | 5.4         | 14.0 | C <sub>16</sub> H <sub>9</sub> O <sub>2</sub> N <sub>3</sub>  |
|          |                    | 275.0821         | -25.9       | -7.1        | 13.5 | C <sub>17</sub> H <sub>11</sub> O <sub>2</sub> N <sub>2</sub> |
| 275.0920 | 0.0                | 275.0906         | 4.9         | 1.4         | 9.0  | C <sub>13</sub> H <sub>13</sub> O <sub>4</sub> N <sub>3</sub> |
|          |                    | 275.0946         | -9.7        | -2.7        | 13.0 | C <sub>18</sub> H <sub>13</sub> O <sub>2</sub> N <sub>1</sub> |
| 275.1092 | 0.0                | 275.1072         | 7.1         | 2.0         | 12.5 | C <sub>19</sub> H <sub>15</sub> O <sub>2</sub>                |
|          |                    | 275.1144         | -19.1       | -5.3        | 8.5  | C <sub>13</sub> H <sub>15</sub> O <sub>3</sub> N <sub>4</sub> |
|          |                    | 275.1032         | 21.7        | 6.0         | 8.5  | C <sub>14</sub> H <sub>15</sub> O <sub>4</sub> N <sub>2</sub> |
|          |                    | 275.1158         | -24.0       | -6.6        | 8.0  | C <sub>15</sub> H <sub>17</sub> O <sub>4</sub> N <sub>1</sub> |
| 275.1813 | 0.1                | 275.1845         | -11.8       | -3.2        | 2.0  | C <sub>12</sub> H <sub>25</sub> O <sub>4</sub> N <sub>3</sub> |
|          |                    | 275.1760         | 19.3        | 5.3         | 6.5  | C <sub>16</sub> H <sub>23</sub> O <sub>2</sub> N <sub>2</sub> |
|          |                    | 275.1885         | -26.4       | -7.3        | 6.0  | C <sub>17</sub> H <sub>25</sub> O <sub>2</sub> N <sub>1</sub> |
| 276.1808 | 0.0                | 276.1798         | 3.9         | 1.1         | 2.0  | C <sub>11</sub> H <sub>24</sub> O <sub>4</sub> N <sub>4</sub> |
|          |                    | 276.1838         | -10.7       | -2.9        | 6.0  | C <sub>16</sub> H <sub>24</sub> O <sub>2</sub> N <sub>2</sub> |
|          |                    | 276.1725         | 30.0        | 8.3         | 6.0  | C <sub>17</sub> H <sub>24</sub> O <sub>3</sub>                |
| 277.0921 | 0.0                | 277.0937         | -5.7        | -1.6        | 8.5  | C <sub>12</sub> H <sub>13</sub> O <sub>4</sub> N <sub>4</sub> |
|          |                    | 277.0977         | -20.2       | -5.6        | 12.5 | C <sub>17</sub> H <sub>13</sub> O <sub>2</sub> N <sub>2</sub> |
|          |                    | 277.0865         | 20.4        | 5.6         | 12.5 | C <sub>18</sub> H <sub>13</sub> O <sub>3</sub>                |
|          |                    | 277.0851         | 25.2        | 7.0         | 13.0 | C <sub>16</sub> H <sub>11</sub> O <sub>2</sub> N <sub>3</sub> |
| 280.0901 | 0.0                | 280.0848         | 18.9        | 5.3         | 12.0 | C <sub>16</sub> H <sub>12</sub> O <sub>3</sub> N <sub>2</sub> |
|          |                    | 280.0960         | -21.2       | -6.0        | 12.0 | C <sub>15</sub> H <sub>12</sub> O <sub>2</sub> N <sub>4</sub> |
|          |                    | 280.0974         | -26.0       | -7.3        | 11.5 | C <sub>17</sub> H <sub>14</sub> O <sub>3</sub> N <sub>1</sub> |
| 280.1076 | 0.0                | 280.1086         | -3.5        | -1.0        | 11.5 | C <sub>16</sub> H <sub>14</sub> O <sub>2</sub> N <sub>3</sub> |
|          |                    | 280.1099         | -8.3        | -2.3        | 11.0 | C <sub>18</sub> H <sub>16</sub> O <sub>3</sub>                |
| 281.1102 | 0.0                | 281.1052         | 17.7        | 5.0         | 11.0 | C <sub>17</sub> H <sub>15</sub> O <sub>3</sub> N <sub>1</sub> |
|          |                    | 281.1164         | -22.2       | -6.3        | 11.0 | C <sub>16</sub> H <sub>15</sub> O <sub>2</sub> N <sub>3</sub> |
|          |                    | 281.1039         | 22.5        | 6.3         | 11.5 | C <sub>15</sub> H <sub>13</sub> O <sub>2</sub> N <sub>4</sub> |
|          |                    | 281.1178         | -27.0       | -7.6        | 10.5 | C <sub>18</sub> H <sub>17</sub> O <sub>3</sub>                |
| 282.0932 | 0.0                | 282.0892         | 14.1        | 4.0         | 11.0 | C <sub>17</sub> H <sub>14</sub> O <sub>4</sub>                |
|          |                    | 282.0879         | 18.9        | 5.3         | 11.5 | C <sub>15</sub> H <sub>12</sub> O <sub>3</sub> N <sub>3</sub> |
|          |                    | 282.1004         | -25.7       | -7.2        | 11.0 | C <sub>16</sub> H <sub>14</sub> O <sub>3</sub> N <sub>2</sub> |
| 282.1511 | 0.0                | 282.1494         | 5.9         | 1.7         | 9.5  | C <sub>18</sub> H <sub>20</sub> O <sub>2</sub> N <sub>1</sub> |
|          |                    | 282.1454         | 20.1        | 5.7         | 5.5  | C <sub>13</sub> H <sub>20</sub> O <sub>4</sub> N <sub>3</sub> |
|          |                    | 282.1580         | -24.4       | -6.9        | 5.0  | C <sub>14</sub> H <sub>22</sub> O <sub>4</sub> N <sub>2</sub> |
| 283.1167 | 0.0                | 283.1195         | -9.9        | -2.8        | 10.5 | C <sub>15</sub> H <sub>15</sub> O <sub>2</sub> N <sub>4</sub> |
|          |                    | 283.1208         | -14.6       | -4.1        | 10.0 | C <sub>17</sub> H <sub>17</sub> O <sub>3</sub> N <sub>1</sub> |
|          |                    | 283.1083         | 29.8        | 8.4         | 10.5 | C <sub>16</sub> H <sub>15</sub> O <sub>3</sub> N <sub>2</sub> |
| 285.1782 | 0.0                | 285.1814         | -11.4       | -3.3        | 3.5  | C <sub>14</sub> H <sub>25</sub> O <sub>4</sub> N <sub>2</sub> |
|          |                    | 285.1729         | 18.6        | 5.3         | 8.0  | C <sub>18</sub> H <sub>23</sub> O <sub>2</sub> N <sub>1</sub> |
|          |                    | 285.1855         | -25.5       | -7.3        | 7.5  | C <sub>19</sub> H <sub>25</sub> O <sub>2</sub>                |
| 285.2029 | 0.0                | 285.2052         | -8.1        | -2.3        | 3.0  | C <sub>14</sub> H <sub>27</sub> O <sub>3</sub> N <sub>3</sub> |
|          |                    | 285.2066         | -12.8       | -3.6        | 2.5  | C <sub>16</sub> H <sub>29</sub> O <sub>4</sub>                |
| 287.1943 | 0.0                | 287.1971         | -9.6        | -2.7        | 2.5  | C <sub>14</sub> H <sub>27</sub> O <sub>4</sub> N <sub>2</sub> |
|          |                    | 287.1885         | 20.2        | 5.8         | 7.0  | C <sub>18</sub> H <sub>25</sub> O <sub>2</sub> N <sub>1</sub> |
|          |                    | 287.2011         | -23.6       | -6.8        | 6.5  | C <sub>19</sub> H <sub>27</sub> O <sub>2</sub>                |
| 288.2010 | 0.0                | 288.2049         | -13.5       | -3.9        | 2.0  | C <sub>14</sub> H <sub>28</sub> O <sub>4</sub> N <sub>2</sub> |
|          |                    | 288.1964         | 16.2        | 4.7         | 6.5  | C <sub>18</sub> H <sub>26</sub> O <sub>2</sub> N <sub>1</sub> |
|          |                    | 288.2089         | -27.5       | -7.9        | 6.0  | C <sub>19</sub> H <sub>28</sub> O <sub>2</sub>                |
| 289.1835 | 0.0                | 289.1804         | 10.9        | 3.2         | 6.5  | C <sub>18</sub> H <sub>25</sub> O <sub>3</sub>                |
|          |                    | 289.1876         | -14.0       | -4.0        | 2.5  | C <sub>12</sub> H <sub>25</sub> O <sub>4</sub> N <sub>4</sub> |
|          |                    | 289.1790         | 15.6        | 4.5         | 7.0  | C <sub>16</sub> H <sub>23</sub> O <sub>2</sub> N <sub>3</sub> |
|          |                    | 289.1916         | -27.9       | -8.1        | 6.5  | C <sub>17</sub> H <sub>25</sub> O <sub>2</sub> N <sub>2</sub> |
| 290.0699 | 0.0                | 290.0691         | 2.8         | 0.8         | 14.0 | C <sub>17</sub> H <sub>10</sub> O <sub>3</sub> N <sub>2</sub> |
| 290.1898 | 0.0                | 290.1882         | 5.5         | 1.6         | 6.0  | C <sub>18</sub> H <sub>26</sub> O <sub>3</sub>                |
|          |                    | 290.1869         | 10.1        | 2.9         | 6.5  | C <sub>16</sub> H <sub>24</sub> O <sub>2</sub> N <sub>3</sub> |
|          |                    | 290.1954         | -19.4       | -5.6        | 2.0  | C <sub>12</sub> H <sub>26</sub> O <sub>4</sub> N <sub>4</sub> |
| 291.1937 | 0.1                | 291.1947         | -3.2        | -0.9        | 6.0  | C <sub>16</sub> H <sub>25</sub> O <sub>2</sub> N <sub>3</sub> |
|          |                    | 291.1960         | -7.8        | -2.3        | 5.5  | C <sub>18</sub> H <sub>27</sub> O <sub>3</sub>                |
| 292.2009 | 0.0                | 292.2025         | -5.5        | -1.6        | 5.5  | C <sub>16</sub> H <sub>26</sub> O <sub>2</sub> N <sub>3</sub> |

Figure S42. HR-MS (EI) spectral data of *N*-Decanoylpyridine-4-carbohydrazide (12)

**Table S1.** Time-kill assay of compound **4** against the *Pseudomonas aeruginosa* PA-01 observed onto nutrient agar plates *via* counting log CFU/mL ( $\pm$  S.D), after 24 hours

| Time (h) | MIC 0.5X (4 $\mu$ g) | MIC 1X (8 $\mu$ g) | MIC 2X (16 $\mu$ g) | Ampicillin/Cloxacillin MIC 1X (32 $\mu$ g) | <i>Pseudomonas aeruginosa</i> PA-01 |
|----------|----------------------|--------------------|---------------------|--------------------------------------------|-------------------------------------|
| 0        | 6 $\pm$ 0.19         | 6 $\pm$ 0.16       | 6 $\pm$ 0.19        | 6 $\pm$ 0.26                               | 6 $\pm$ 0.21                        |
| 4        | 6 $\pm$ 0.13         | 5 $\pm$ 0.19       | 2 $\pm$ 0.22        | 5 $\pm$ 0.29                               | 6 $\pm$ 0.19                        |
| 8        | 5.2 $\pm$ 0.18       | 3.2 $\pm$ 0.18     | 1 $\pm$ 0.27        | 5 $\pm$ 0.31                               | 6.8 $\pm$ 0.21                      |
| 12       | 3 $\pm$ 0.179        | 2 $\pm$ 0.21       | 1 $\pm$ 0.27        | 3 $\pm$ 0.37                               | 7.3 $\pm$ 0.16                      |
| 24       | 2 $\pm$ 0.18         | 1.1 $\pm$ 0.19     | 1 $\pm$ 0.24        | 2 $\pm$ 0.32                               | 7.2 $\pm$ 0.18                      |
| 48       | 1.1 $\pm$ 0.17       | 0.8 $\pm$ 0.16     | 1 $\pm$ 0.19        | 1 $\pm$ 0.36                               | 7.4 $\pm$ 0.18                      |

**Table S2.** Time-kill assay of compound **4** against the *Staphylococcus aureus* ATCC 29213 observed onto nutrient agar plates *via* counting log CFU/mL ( $\pm$  S.D), after 24 hours

| Time (h) | MIC 0.5X (4 $\mu$ g) | MIC 1X (8 $\mu$ g) | MIC 2X (16 $\mu$ g) | ampicillin/cloxacillin MIC 1X (16 $\mu$ g) | <i>Staphylococcus aureus</i> ATCC 29213 |
|----------|----------------------|--------------------|---------------------|--------------------------------------------|-----------------------------------------|
| 0        | 6 $\pm$ 0.61         | 6 $\pm$ 0.58       | 6 $\pm$ 0.47        | 6 $\pm$ 0.54                               | 6 $\pm$ 0.69                            |
| 4        | 5 $\pm$ 0.63         | 5.8 $\pm$ 0.60     | 4.91 $\pm$ 0.45     | 5.8 $\pm$ 0.51                             | 5.9 $\pm$ 0.81                          |
| 8        | 4.8 $\pm$ 0.58       | 4.3 $\pm$ 0.57     | 3.1 $\pm$ 0.41      | 5.3 $\pm$ 0.49                             | 6.3 $\pm$ 0.84                          |
| 12       | 4.67 $\pm$ 0.54      | 3.51 $\pm$ 0.51    | 2.24 $\pm$ 0.44     | 3.1 $\pm$ 0.53                             | 6.8 $\pm$ 0.79                          |
| 24       | 3.9 $\pm$ 0.56       | 2.9 $\pm$ 0.43     | 1.2 $\pm$ 0.4       | 2.9 $\pm$ 0.55                             | 7.1 $\pm$ 0.89                          |
| 48       | 4.12 $\pm$ 0.59      | 1.78 $\pm$ 0.51    | 1 $\pm$ 0.52        | 1.9 $\pm$ 0.56                             | 6.9 $\pm$ 1.17                          |

**Table S3.** Time-kill assay of compound **6** against the *Candida glabrata* ATCC 2001 observed onto SDA agar plates *via* counting log CFU/mL ( $\pm$  S.D), after 48 hours

| Time (h) | MIC 0.5X (8 $\mu$ g) | MIC 1X (16 $\mu$ g) | MIC 2X (32 $\mu$ g) | Fluconazole (32 $\mu$ g) | <i>Candida glabrata</i> ATCC 2001 |
|----------|----------------------|---------------------|---------------------|--------------------------|-----------------------------------|
| 0        | 5.88 $\pm$ 0.19      | 5.93 $\pm$ 0.16     | 5.98 $\pm$ 0.21     | 5.71 $\pm$ 0.19          | 5.75 $\pm$ 0.18                   |
| 4        | 5.59 $\pm$ 0.21      | 4.98 $\pm$ 0.24     | 5.02 $\pm$ 0.19     | 5.7 $\pm$ 0.32           | 5.75 $\pm$ 0.21                   |
| 8        | 5.31 $\pm$ 0.17      | 4.57 $\pm$ 0.21     | 4.11 $\pm$ 0.22     | 5.62 $\pm$ 0.67          | 6.1 $\pm$ 0.16                    |
| 12       | 4.92 $\pm$ 0.11      | 4.02 $\pm$ 0.13     | 3.02 $\pm$ 0.17     | 4.01 $\pm$ 0.81          | 6.89 $\pm$ 0.12                   |
| 24       | 3.96 $\pm$ 0.13      | 3.21 $\pm$ 0.18     | 2.11 $\pm$ 0.19     | 3.15 $\pm$ 1.01          | 7.02 $\pm$ 0.13                   |
| 48       | 3.01 $\pm$ 0.09      | 2.01 $\pm$ 0.19     | 1.12 $\pm$ 1.08     | 2.81 $\pm$ 1.32          | 7.04 $\pm$ 0.16                   |

**Table S4.** Comparison of percent hemolysis % ( $\pm$  S.D) observed for the compounds **4** and **6**

| Time (h) | Ampicillin/cloxacillin (32 $\mu$ g) | Fluconazole (32 $\mu$ g) | Compound <b>4</b> (32 $\mu$ g) | Compound <b>6</b> (32 $\mu$ g) | DMSO (5%)     | Triton X-100 (1%) | SDS (1%)       |
|----------|-------------------------------------|--------------------------|--------------------------------|--------------------------------|---------------|-------------------|----------------|
| 0        | 0                                   | 0                        | 0                              | 0                              | 0             | 3 $\pm$ 0.11      | 5 $\pm$ 0.19   |
| 5        | 0                                   | 0                        | 0                              | 0                              | 0             | 20 $\pm$ 0.11     | 25 $\pm$ 0.44  |
| 10       | 0                                   | 0                        | 0                              | 0                              | 10 $\pm$ 0.39 | 60 $\pm$ 0.58     | 60 $\pm$ 0.61  |
| 15       | 0                                   | 0                        | 0                              | 0                              | 15 $\pm$ 0.46 | 80 $\pm$ 0.57     | 80 $\pm$ 0.62  |
| 20       | 0                                   | 1 $\pm$ 0.12             | 0                              | 2.6 $\pm$ 0.42                 | 22 $\pm$ 0.46 | 90 $\pm$ 0.61     | 100 $\pm$ 0.64 |
| 30       | 0                                   | 1 $\pm$ 0.19             | 0                              | 2.8 $\pm$ 0.44                 | 27 $\pm$ 0.56 | 100 $\pm$ 0.65    | 100 $\pm$ 0.79 |
